# Supplementary material for: Heterogeneous ethylene hydroformylation on polymer supported Rh-based catalysts: a DFT analysis of the mechanism and Rh–P effect
Source: Royal Society of Chemistry journal article supplement (doi:10.1039/d2cy00924b), 2022-01-01
Supplement: d2cy00924b1.pdf [file d2cy00924b1.pdf]

## Supporting Information

### **Ethylene heterogeneous hydroformylation on Polymer Supported Rh-based Catalyst: A DFT analysis of Mechanism and Rh-P Effect**

Jing Ma<sup>1,2</sup>, Meizhe Liu<sup>1,2</sup>, Mingxuan Zhu<sup>1,2</sup>, Yutong Wang<sup>1,2</sup>, Baohe Wang<sup>1,2\*</sup>

<sup>1</sup>Key Laboratory for Green Chemical Technology of Ministry of Education, R&D Center for Petrochemical  
Technology, Tianjin University, Tianjin 300072, China

<sup>2</sup>Collaborative Innovation Center of Chemical Science and Engineering, Tianjin University, Tianjin 300072, China

#### **Corresponding Author**

\*E-mail for Baohe Wang: wangbh@tju.edu.cn

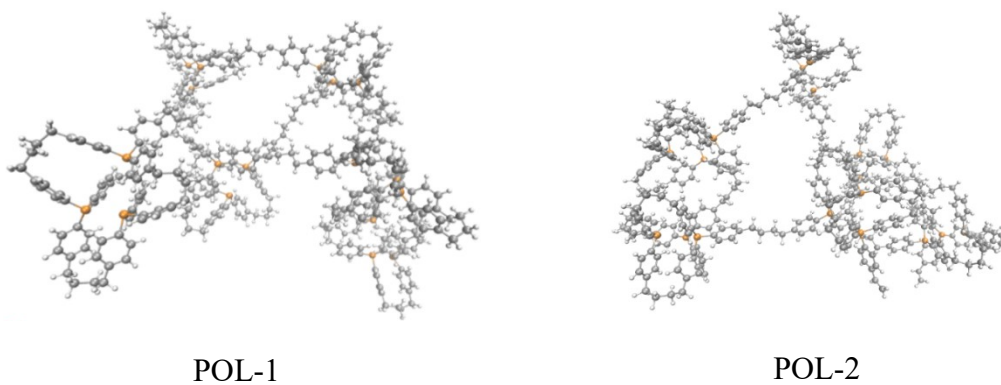

**Fig. S1.** Construction of 3V-PPh<sub>3</sub> polymer with different cross-linking methods

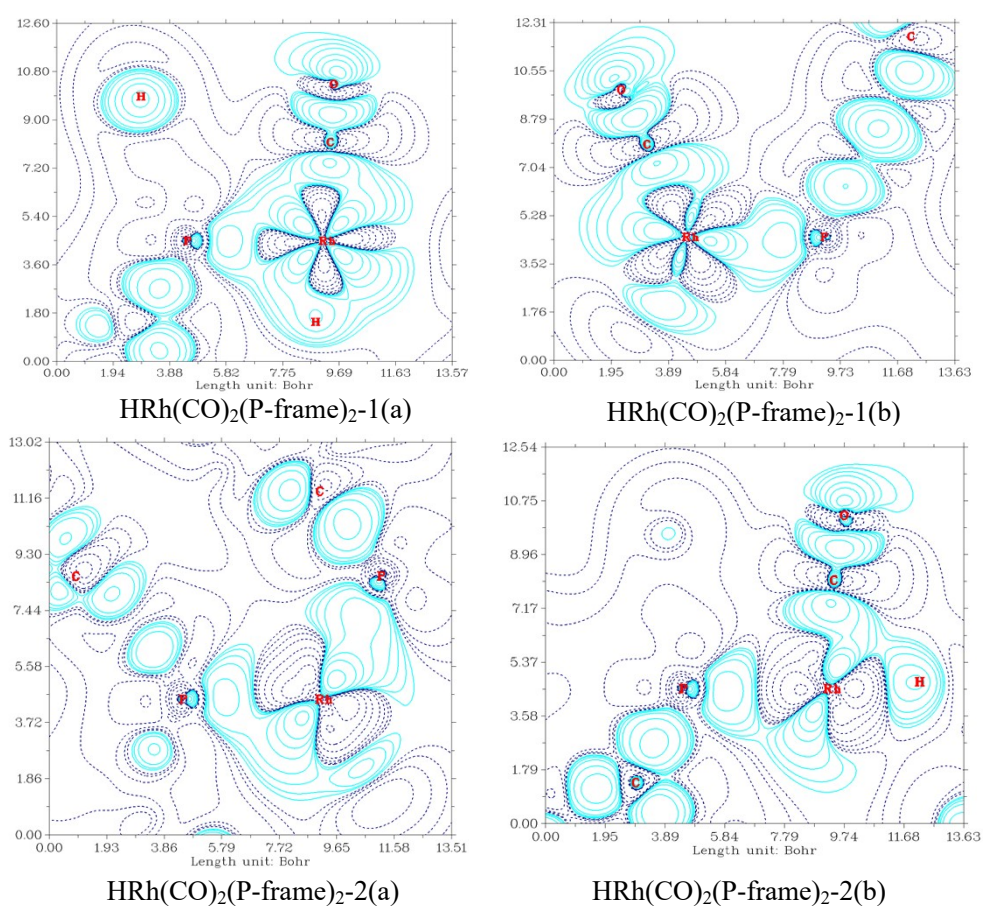

**Fig. S2.** Diagram of deformation density during the formation of HRh(CO)<sub>2</sub>(P-frame)<sub>2</sub>, where (I), (II), (III) and (IV) represent the different cross-sections of HRh(CO)<sub>2</sub>(P-frame)<sub>2</sub>-1(a), -1(b), -2(a) and -2(b), respectively (cyan and dark blue colors indicate regions with the increase and decrease of electron density, respectively)

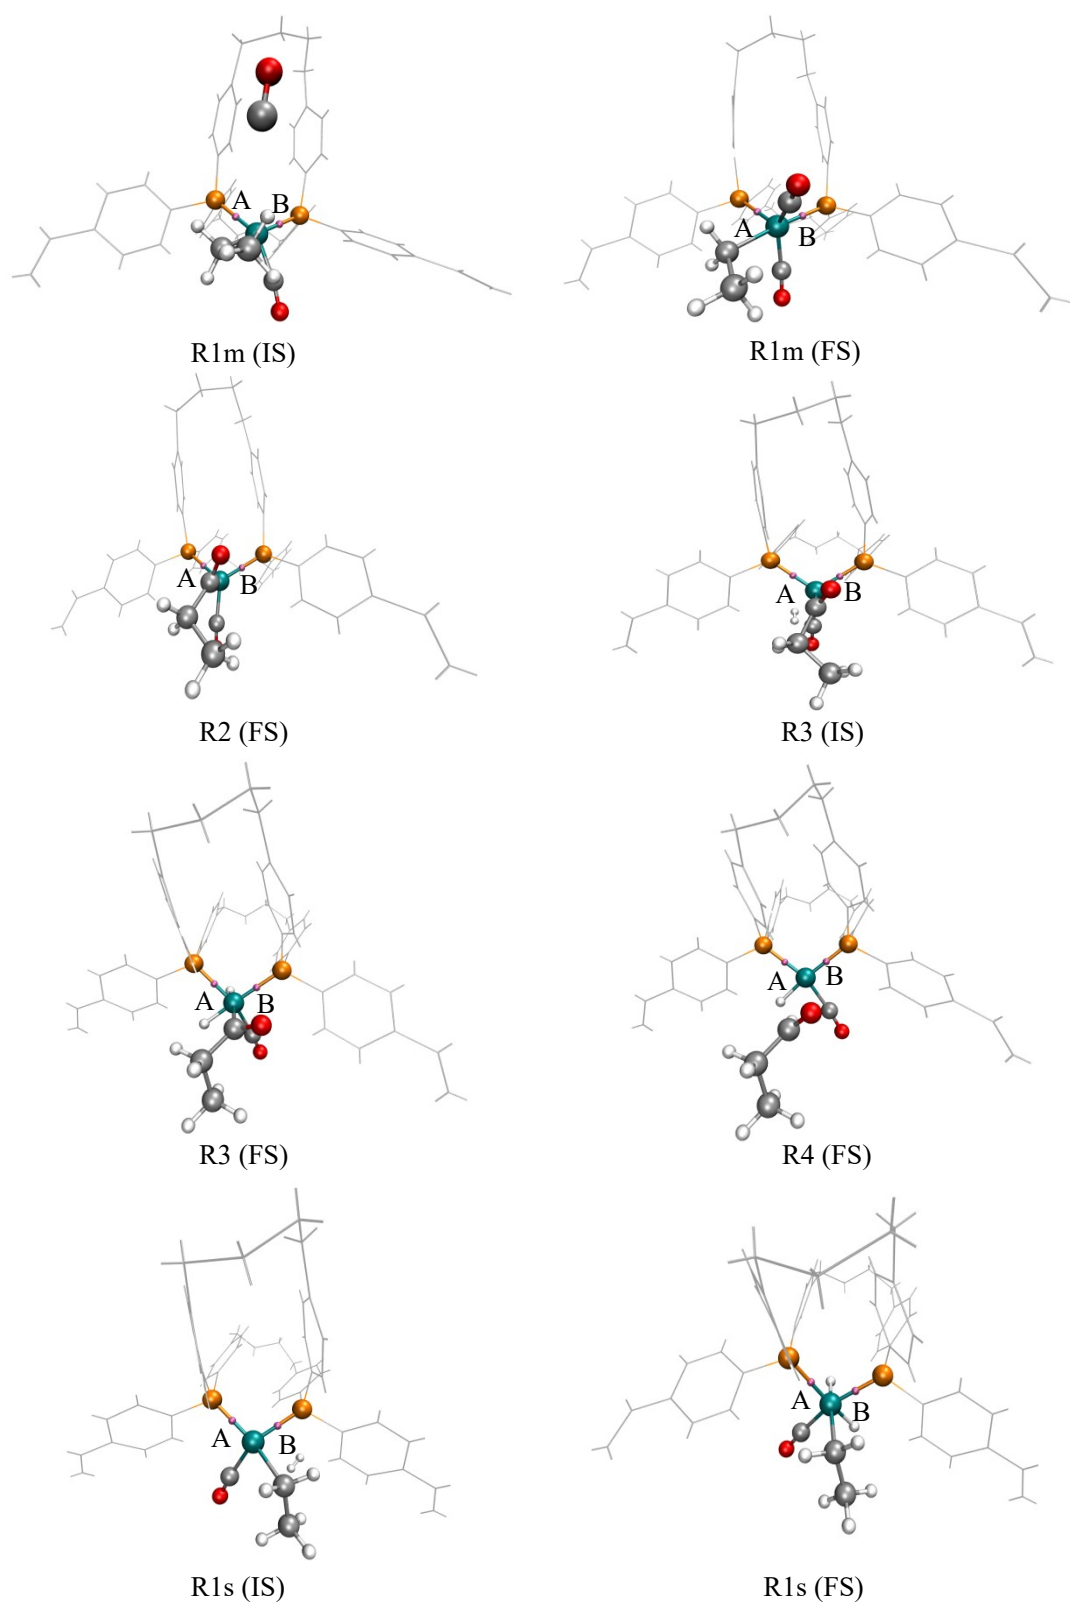

**Fig. S3.** AIM analysis of the stable configurations of reactants and products under the R1m-R4 and R1s path of cross-linking method 1 (Mauve balls represent the bond critical point)

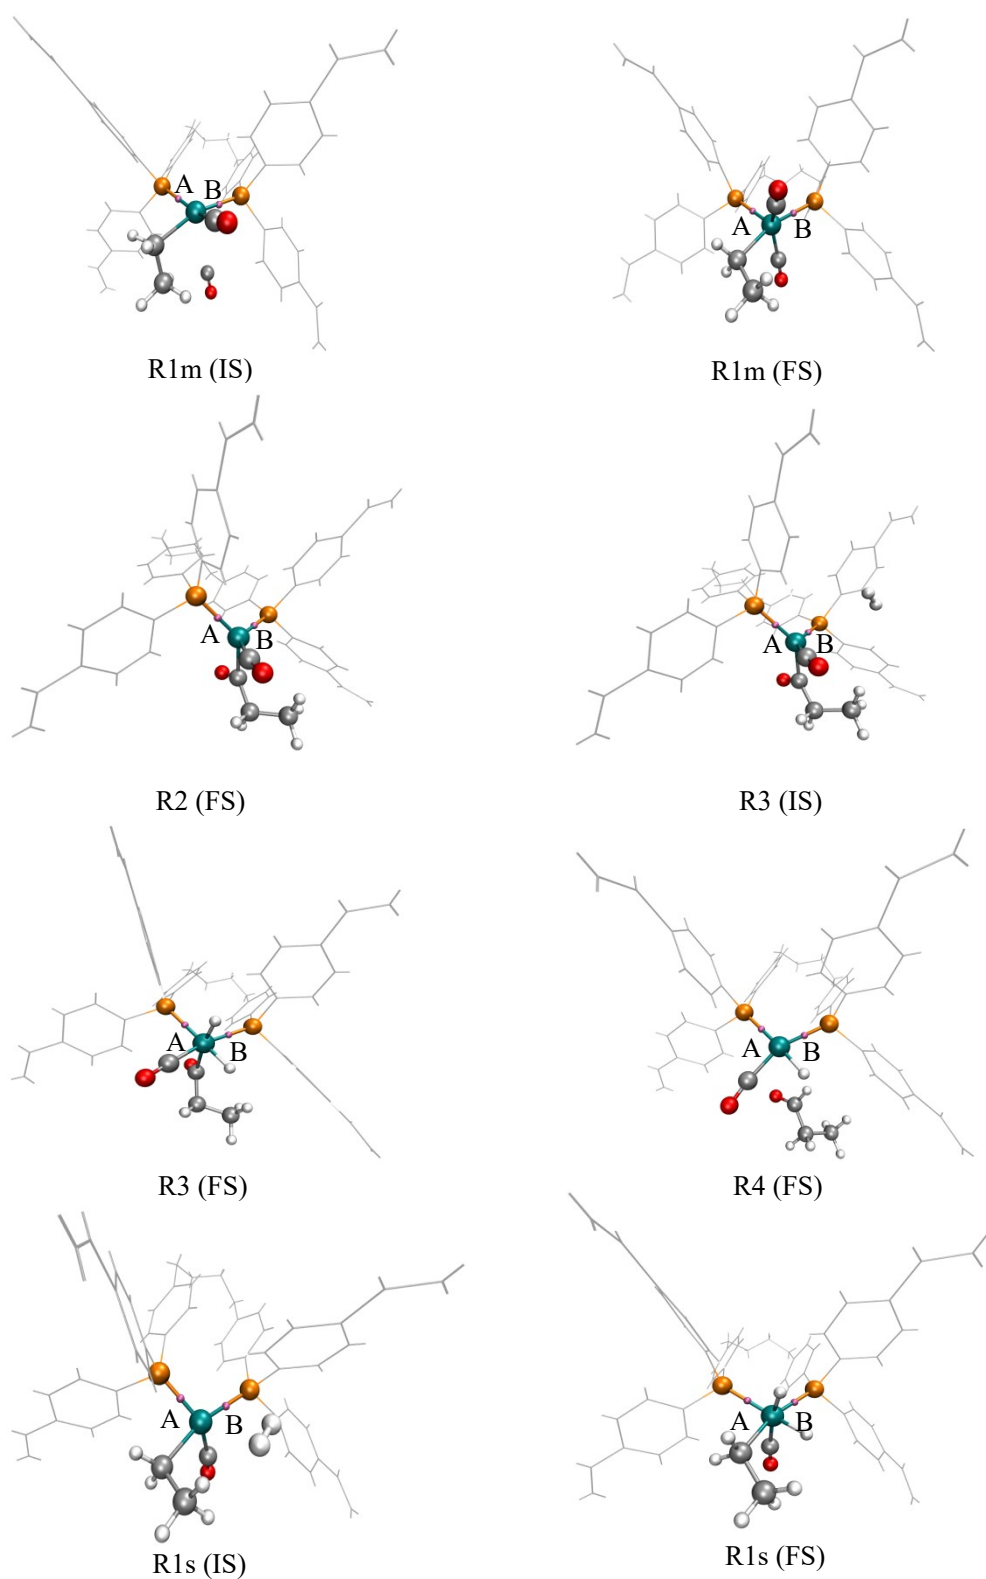

**Fig. S4.** AIM analysis of the stable configurations of reactants and products under the R1m-R4 and R1s path of cross-linking method 2 (Mauve balls represent the bond critical point)

**Table S1.** Topological parameters of the reactants and products in R1~R4 path of crosslinking method 2

| Reaction<br>/Status | BCP | $\rho(r)$<br>(au) | $\nabla^2\rho$<br>(au) | $G(r)$<br>(au) | $V(r)$<br>(au) | $H(r)$<br>(au) | $ V(r) /G(r)$ |
|---------------------|-----|-------------------|------------------------|----------------|----------------|----------------|---------------|
| R1m/IS              | A   | 0.087             | 0.145                  | 0.067          | -0.097         | -0.031         | 1.448         |
|                     | B   | 0.084             | 0.154                  | 0.067          | -0.096         | -0.029         | 1.433         |
| R1m/FS              | A   | 0.079             | 0.135                  | 0.060          | -0.087         | -0.026         | 1.450         |
|                     | B   | 0.082             | 0.131                  | 0.060          | -0.088         | -0.027         | 1.467         |
| R2/FS               | A   | 0.077             | 0.123                  | 0.056          | -0.081         | -0.025         | 1.446         |
|                     | B   | 0.084             | 0.144                  | 0.065          | -0.094         | -0.029         | 1.446         |
| R3/IS               | A   | 0.076             | 0.125                  | 0.056          | -0.081         | -0.025         | 1.446         |
|                     | B   | 0.082             | 0.143                  | 0.063          | -0.091         | -0.028         | 1.444         |
| R3 (FS)             | A   | 0.070             | 0.135                  | 0.054          | -0.075         | -0.021         | 1.389         |
|                     | B   | 0.083             | 0.127                  | 0.060          | -0.088         | -0.028         | 1.467         |
| R4/FS               | A   | 0.081             | 0.156                  | 0.066          | -0.092         | -0.027         | 1.394         |
|                     | B   | 0.089             | 0.143                  | 0.068          | -0.099         | -0.032         | 1.456         |
| R1s/IS              | A   | 0.089             | 0.149                  | 0.070          | -0.102         | -0.032         | 1.457         |
|                     | B   | 0.085             | 0.151                  | 0.067          | -0.096         | -0.029         | 1.433         |
| R1s/FS              | A   | 0.077             | 0.144                  | 0.060          | -0.084         | -0.024         | 1.400         |
|                     | B   | 0.084             | 0.138                  | 0.064          | -0.092         | -0.029         | 1.438         |

**The Cartesian coordinates of the reactants, intermediates and transition states:**

| <b>HRh(CO)<sub>2</sub>(P-frame)<sub>2</sub>-1(a)</b> |    |         |         |         |
|------------------------------------------------------|----|---------|---------|---------|
| ATOM                                                 | X  | Y       | Z       |         |
| P                                                    | 1  | 23.7482 | 5.5737  | 14.6312 |
| C                                                    | 2  | 22.9021 | 4.6865  | 13.2656 |
| C                                                    | 3  | 24.9150 | 4.4421  | 15.4662 |
| C                                                    | 4  | 24.7987 | 6.8048  | 13.7679 |
| C                                                    | 5  | 26.1789 | 6.9493  | 13.9708 |
| C                                                    | 6  | 26.8505 | 8.0825  | 13.5107 |
| C                                                    | 7  | 26.1793 | 9.1127  | 12.8307 |
| C                                                    | 8  | 24.8022 | 8.9353  | 12.5817 |
| C                                                    | 9  | 24.1289 | 7.8184  | 13.0488 |
| C                                                    | 10 | 25.6082 | 4.9635  | 16.5768 |
| C                                                    | 11 | 26.4165 | 4.1516  | 17.3641 |
| C                                                    | 12 | 26.5193 | 2.7726  | 17.1159 |
| C                                                    | 13 | 25.8178 | 2.2563  | 16.0167 |
| C                                                    | 14 | 25.0358 | 3.0727  | 15.1954 |
| C                                                    | 15 | 21.6033 | 4.2149  | 13.5270 |
| C                                                    | 16 | 20.7351 | 3.9046  | 12.4809 |
| C                                                    | 17 | 21.1165 | 4.0838  | 11.1449 |
| C                                                    | 18 | 22.4516 | 4.4358  | 10.8873 |
| C                                                    | 19 | 23.3319 | 4.7300  | 11.9277 |
| C                                                    | 20 | 27.2574 | 1.8515  | 18.0595 |
| C                                                    | 21 | 26.9153 | 10.3149 | 12.4347 |
| C                                                    | 22 | 20.0922 | 4.0568  | 10.0352 |
| C                                                    | 23 | 26.5114 | 1.6768  | 19.4073 |
| C                                                    | 24 | 19.8869 | 5.4537  | 9.3965  |
| C                                                    | 25 | 26.4068 | 11.4609 | 11.9421 |
| H                                                    | 26 | 26.7312 | 6.1786  | 14.5084 |
| H                                                    | 27 | 27.9221 | 8.1808  | 13.6975 |
| H                                                    | 28 | 24.2470 | 9.6986  | 12.0363 |
| H                                                    | 29 | 23.0523 | 7.7390  | 12.8863 |
| H                                                    | 30 | 25.4952 | 6.0168  | 16.8392 |
| H                                                    | 31 | 26.9424 | 4.5982  | 18.2083 |
| H                                                    | 32 | 25.8781 | 1.1871  | 15.8026 |
| H                                                    | 33 | 24.5070 | 2.6384  | 14.3458 |
| H                                                    | 34 | 21.2401 | 4.1744  | 14.5542 |
| H                                                    | 35 | 19.7129 | 3.5987  | 12.7112 |
| H                                                    | 36 | 22.7954 | 4.5344  | 9.8556  |
| H                                                    | 37 | 24.3441 | 5.0643  | 11.6981 |
| H                                                    | 38 | 28.2772 | 2.2258  | 18.2491 |
| H                                                    | 39 | 27.9981 | 10.2547 | 12.5799 |
| H                                                    | 40 | 19.1392 | 3.6769  | 10.4327 |
| H                                                    | 41 | 26.6528 | 0.6485  | 19.7767 |
| H                                                    | 42 | 25.4343 | 1.7848  | 19.2119 |
| H                                                    | 43 | 19.0788 | 5.3897  | 8.6495  |
| H                                                    | 44 | 20.7992 | 5.7073  | 8.8341  |
| H                                                    | 45 | 25.3357 | 11.6096 | 11.7949 |
| H                                                    | 46 | 27.0571 | 12.2967 | 11.6871 |
| P                                                    | 47 | 22.0899 | 7.5037  | 19.6661 |
| C                                                    | 48 | 23.1927 | 6.1363  | 20.2263 |
| C                                                    | 49 | 20.8355 | 7.6452  | 21.0046 |
| C                                                    | 50 | 23.1414 | 9.0135  | 19.8638 |
| C                                                    | 51 | 22.8014 | 10.0846 | 20.6977 |
| C                                                    | 52 | 23.3662 | 11.3486 | 20.4982 |
| C                                                    | 53 | 24.2907 | 11.5785 | 19.4757 |
| C                                                    | 54 | 24.7416 | 10.4631 | 18.7469 |
| C                                                    | 55 | 24.1751 | 9.2078  | 18.9298 |
| C                                                    | 56 | 20.6678 | 6.6993  | 22.0234 |
| C                                                    | 57 | 19.5830 | 6.7922  | 22.9016 |
| C                                                    | 58 | 18.6616 | 7.8461  | 22.8234 |
| C                                                    | 59 | 18.8727 | 8.8193  | 21.8338 |
| C                                                    | 60 | 19.9137 | 8.7025  | 20.9209 |
| C                                                    | 61 | 22.9013 | 4.7994  | 19.9163 |
| C                                                    | 62 | 23.7268 | 3.7653  | 20.3659 |
| C                                                    | 63 | 24.8828 | 4.0319  | 21.1155 |
| C                                                    | 64 | 25.1718 | 5.3725  | 21.4117 |
| C                                                    | 65 | 24.3432 | 6.4085  | 20.9841 |
| C                                                    | 66 | 17.4285 | 7.8647  | 23.6976 |
| C                                                    | 67 | 24.7386 | 12.9677 | 19.0856 |
| C                                                    | 68 | 25.8369 | 2.9461  | 21.5587 |
| C                                                    | 69 | 16.1675 | 7.3491  | 22.9566 |
| C                                                    | 70 | 26.9412 | 2.6545  | 20.5148 |
| C                                                    | 71 | 24.2471 | 13.4008 | 17.6733 |
| H                                                    | 72 | 22.0451 | 9.9584  | 21.4710 |
| H                                                    | 73 | 23.0397 | 12.1794 | 21.1272 |
| H                                                    | 74 | 25.5018 | 10.5904 | 17.9734 |
| H                                                    | 75 | 24.4888 | 8.3848  | 18.2881 |
| H                                                    | 76 | 21.3741 | 5.8751  | 22.1250 |
| H                                                    | 77 | 19.4543 | 6.0225  | 23.6661 |
| H                                                    | 78 | 18.1894 | 9.6648  | 21.7474 |
| H                                                    | 79 | 20.0027 | 9.4289  | 20.1128 |
| H                                                    | 80 | 22.0254 | 4.5581  | 19.3146 |
| H                                                    | 81 | 23.4626 | 2.7347  | 20.1257 |
| H                                                    | 82 | 26.0641 | 5.6094  | 21.9956 |
| H                                                    | 83 | 24.5911 | 7.4374  | 21.2430 |
| H                                                    | 84 | 17.2425 | 8.8827  | 24.0769 |

|   |     |         |         |         |
|---|-----|---------|---------|---------|
| H | 85  | 25.8395 | 13.0008 | 19.0945 |
| H | 86  | 25.2858 | 2.0187  | 21.7785 |
| H | 87  | 15.4834 | 6.8870  | 23.6855 |
| H | 88  | 16.4850 | 6.5397  | 22.2850 |
| H | 89  | 27.8267 | 2.2439  | 21.0260 |
| H | 90  | 27.2622 | 3.6125  | 20.0807 |
| H | 91  | 24.0257 | 12.4971 | 17.0878 |
| H | 92  | 25.0773 | 13.9009 | 17.1530 |
| P | 93  | 19.2097 | 8.6323  | 16.7742 |
| C | 94  | 19.5342 | 10.4459 | 16.8958 |
| C | 95  | 17.6977 | 8.3418  | 17.7849 |
| C | 96  | 18.6763 | 8.1983  | 15.0602 |
| C | 97  | 18.4223 | 6.8352  | 14.8345 |
| C | 98  | 18.1959 | 6.3502  | 13.5519 |
| C | 99  | 18.2365 | 7.1931  | 12.4318 |
| C | 100 | 18.4201 | 8.5635  | 12.6652 |
| C | 101 | 18.6285 | 9.0643  | 13.9572 |
| C | 102 | 17.6814 | 7.2099  | 18.6077 |
| C | 103 | 16.6491 | 7.0030  | 19.5211 |
| C | 104 | 15.6406 | 7.9602  | 19.6940 |
| C | 105 | 15.6159 | 9.0515  | 18.8080 |
| C | 106 | 16.6098 | 9.2283  | 17.8455 |
| C | 107 | 19.2103 | 11.1098 | 18.0943 |
| C | 108 | 19.9120 | 12.2427 | 18.4923 |
| C | 109 | 20.9466 | 12.7877 | 17.7146 |
| C | 110 | 21.1712 | 12.2072 | 16.4599 |
| C | 111 | 20.4885 | 11.0523 | 16.0598 |
| C | 112 | 14.6981 | 7.9097  | 20.8735 |
| C | 113 | 18.2042 | 6.6059  | 11.0396 |
| C | 114 | 21.7347 | 13.9486 | 18.2888 |
| C | 115 | 15.3883 | 8.4210  | 22.1668 |
| C | 116 | 23.0525 | 14.3702 | 17.6261 |
| C | 117 | 19.6141 | 6.5931  | 10.3911 |
| H | 118 | 18.4322 | 6.1322  | 15.6677 |
| H | 119 | 18.0209 | 5.2825  | 13.4092 |
| H | 120 | 18.4216 | 9.2601  | 11.8242 |
| H | 121 | 18.7698 | 10.1370 | 14.0939 |
| H | 122 | 18.5242 | 6.5173  | 18.5724 |
| H | 123 | 16.6702 | 6.1125  | 20.1493 |
| H | 124 | 14.8172 | 9.7920  | 18.8907 |
| H | 125 | 16.5652 | 10.0880 | 17.1756 |
| H | 126 | 18.4617 | 10.6922 | 18.7654 |
| H | 127 | 19.6802 | 12.6935 | 19.4601 |
| H | 128 | 21.9353 | 12.6115 | 15.7952 |

|                                                      |     |         |         |         |
|------------------------------------------------------|-----|---------|---------|---------|
| H                                                    | 129 | 20.7875 | 10.5715 | 15.1289 |
| H                                                    | 130 | 14.3203 | 6.8874  | 21.0337 |
| H                                                    | 131 | 17.5122 | 7.1694  | 10.3944 |
| H                                                    | 132 | 21.9223 | 13.7225 | 19.3511 |
| H                                                    | 133 | 14.6313 | 8.8668  | 22.8312 |
| H                                                    | 134 | 16.0588 | 9.2441  | 21.8815 |
| H                                                    | 135 | 23.3603 | 15.3141 | 18.1066 |
| H                                                    | 136 | 22.8638 | 14.6304 | 16.5717 |
| H                                                    | 137 | 20.3699 | 6.5487  | 11.1882 |
| H                                                    | 138 | 19.7763 | 7.5542  | 9.8802  |
| H                                                    | 139 | 17.6129 | 7.2347  | 24.5797 |
| H                                                    | 140 | 24.4070 | 13.6942 | 19.8434 |
| H                                                    | 141 | 13.8218 | 8.5382  | 20.6583 |
| H                                                    | 142 | 21.0722 | 14.8317 | 18.3012 |
| H                                                    | 143 | 27.3731 | 0.8729  | 17.5729 |
| H                                                    | 144 | 20.3987 | 3.3553  | 9.2431  |
| H                                                    | 145 | 26.3085 | 3.2614  | 22.5014 |
| H                                                    | 146 | 17.8104 | 5.5802  | 11.0980 |
| C                                                    | 147 | 20.9107 | 5.7564  | 17.0928 |
| O                                                    | 148 | 20.6959 | 4.6276  | 16.8830 |
| Rh                                                   | 149 | 21.2334 | 7.6264  | 17.4823 |
| H                                                    | 150 | 21.3837 | 9.1307  | 17.9726 |
| C                                                    | 151 | 22.5769 | 8.3152  | 16.2778 |
| O                                                    | 152 | 23.3430 | 8.9611  | 15.6870 |
| <b>HRh(CO)<sub>2</sub>(P-frame)<sub>2</sub>-1(b)</b> |     |         |         |         |
| ATOM                                                 | X   | Y       | Z       |         |
| P                                                    | 1   | 24.1356 | 3.4092  | 13.3001 |
| C                                                    | 2   | 23.4108 | 3.1843  | 14.9797 |
| C                                                    | 3   | 25.5779 | 2.2676  | 13.2364 |
| C                                                    | 4   | 22.8471 | 2.6664  | 12.2108 |
| C                                                    | 5   | 22.9465 | 1.3926  | 11.6378 |
| C                                                    | 6   | 21.9552 | 0.9345  | 10.7622 |
| C                                                    | 7   | 20.8382 | 1.7182  | 10.4407 |
| C                                                    | 8   | 20.7389 | 2.9854  | 11.0390 |
| C                                                    | 9   | 21.7273 | 3.4554  | 11.8979 |
| C                                                    | 10  | 26.4891 | 2.4355  | 12.1794 |
| C                                                    | 11  | 27.6945 | 1.7442  | 12.1588 |
| C                                                    | 12  | 28.0674 | 0.8923  | 13.2126 |
| C                                                    | 13  | 27.1302 | 0.6818  | 14.2324 |
| C                                                    | 14  | 25.9015 | 1.3534  | 14.2495 |
| C                                                    | 15  | 23.7598 | 4.0699  | 16.0122 |
| C                                                    | 16  | 23.1580 | 3.9785  | 17.2643 |
| C                                                    | 17  | 22.1579 | 3.0245  | 17.5285 |
| C                                                    | 18  | 21.8288 | 2.1231  | 16.4957 |

|   |    |         |         |         |
|---|----|---------|---------|---------|
| C | 19 | 22.4411 | 2.2016  | 15.2481 |
| C | 20 | 29.4339 | 0.2350  | 13.2193 |
| C | 21 | 19.7865 | 1.2162  | 9.4696  |
| C | 22 | 21.4824 | 3.0374  | 18.8295 |
| C | 23 | 30.6263 | 1.1786  | 12.9050 |
| C | 24 | 20.3269 | 2.4296  | 19.1495 |
| H | 25 | 23.8136 | 0.7656  | 11.8496 |
| H | 26 | 22.0654 | -0.0499 | 10.3025 |
| H | 27 | 19.8967 | 3.6379  | 10.8055 |
| H | 28 | 21.6551 | 4.4685  | 12.2942 |
| H | 29 | 26.2620 | 3.1442  | 11.3826 |
| H | 30 | 28.3772 | 1.9082  | 11.3242 |
| H | 31 | 27.3789 | 0.0083  | 15.0558 |
| H | 32 | 25.2175 | 1.1982  | 15.0845 |
| H | 33 | 24.4688 | 4.8756  | 15.8204 |
| H | 34 | 23.4330 | 4.6970  | 18.0387 |
| H | 35 | 21.0764 | 1.3530  | 16.6688 |
| H | 36 | 22.1424 | 1.5050  | 14.4647 |
| H | 37 | 29.4222 | -0.5666 | 12.4628 |
| C | 38 | 19.2448 | 2.2770  | 8.4765  |
| H | 39 | 21.9738 | 3.6454  | 19.5947 |
| H | 40 | 30.2485 | 2.0714  | 12.3859 |
| H | 41 | 31.2977 | 0.6799  | 12.1895 |
| H | 42 | 19.7510 | 1.8475  | 18.4289 |
| H | 43 | 19.9069 | 2.5194  | 20.1509 |
| P | 44 | 26.6105 | 6.5407  | 13.5269 |
| C | 45 | 27.9629 | 5.4732  | 14.1652 |
| C | 46 | 26.0815 | 7.6508  | 14.9083 |
| C | 47 | 27.3718 | 7.6504  | 12.2623 |
| C | 48 | 27.6311 | 9.0106  | 12.4834 |
| C | 49 | 27.7327 | 9.8971  | 11.4049 |
| C | 50 | 27.6149 | 9.4545  | 10.0806 |
| C | 51 | 27.5433 | 8.0668  | 9.8686  |
| C | 52 | 27.4060 | 7.1859  | 10.9355 |
| C | 53 | 26.1312 | 7.2647  | 16.2559 |
| C | 54 | 25.2986 | 7.8737  | 17.2070 |
| C | 55 | 24.4181 | 8.9024  | 16.8527 |
| C | 56 | 24.4796 | 9.3754  | 15.5317 |
| C | 57 | 25.2743 | 8.7573  | 14.5776 |
| C | 58 | 27.6226 | 4.4429  | 15.0573 |
| C | 59 | 28.5572 | 3.4863  | 15.4373 |
| C | 60 | 29.8544 | 3.4788  | 14.9077 |
| C | 61 | 30.2059 | 4.5269  | 14.0428 |
| C | 62 | 29.2812 | 5.5130  | 13.6806 |

|   |     |         |         |         |
|---|-----|---------|---------|---------|
| C | 63  | 23.3492 | 9.4424  | 17.7744 |
| C | 64  | 27.4335 | 10.4301 | 8.9357  |
| C | 65  | 30.7873 | 2.3414  | 15.2603 |
| C | 66  | 21.9167 | 9.0680  | 17.2881 |
| C | 67  | 31.4947 | 1.6314  | 14.0898 |
| C | 68  | 26.2728 | 10.0310 | 7.9875  |
| H | 69  | 27.6622 | 9.4016  | 13.5003 |
| H | 70  | 27.8434 | 10.9656 | 11.6051 |
| H | 71  | 27.5027 | 7.6728  | 8.8522  |
| H | 72  | 27.2264 | 6.1300  | 10.7325 |
| H | 73  | 26.7883 | 6.4527  | 16.5680 |
| H | 74  | 25.3183 | 7.5114  | 18.2376 |
| H | 75  | 23.8363 | 10.2033 | 15.2280 |
| H | 76  | 25.2222 | 9.1008  | 13.5454 |
| H | 77  | 26.6016 | 4.3567  | 15.4272 |
| H | 78  | 28.2547 | 2.6914  | 16.1197 |
| H | 79  | 31.2145 | 4.5716  | 13.6264 |
| H | 80  | 29.5821 | 6.3032  | 12.9919 |
| H | 81  | 23.4364 | 10.5408 | 17.8140 |
| H | 82  | 28.3653 | 10.5264 | 8.3533  |
| H | 83  | 30.2088 | 1.6021  | 15.8346 |
| H | 84  | 21.5387 | 8.2118  | 17.8702 |
| H | 85  | 21.9747 | 8.7121  | 16.2509 |
| H | 86  | 25.5600 | 9.4031  | 8.5417  |
| H | 87  | 26.6669 | 9.3933  | 7.1820  |
| P | 88  | 20.8516 | 7.9345  | 11.1073 |
| C | 89  | 21.7384 | 9.2944  | 10.2569 |
| C | 90  | 20.0468 | 8.6863  | 12.5784 |
| C | 91  | 19.5996 | 7.2333  | 9.9715  |
| C | 92  | 18.2939 | 6.9001  | 10.3758 |
| C | 93  | 17.5664 | 5.9253  | 9.6885  |
| C | 94  | 18.0916 | 5.2717  | 8.5627  |
| C | 95  | 19.3321 | 5.7158  | 8.0785  |
| C | 96  | 20.0827 | 6.6583  | 8.7778  |
| C | 97  | 19.5216 | 7.8071  | 13.5442 |
| C | 98  | 19.2848 | 8.2322  | 14.8499 |
| C | 99  | 19.5933 | 9.5376  | 15.2599 |
| C | 100 | 20.0357 | 10.4359 | 14.2763 |
| C | 101 | 20.2537 | 10.0251 | 12.9591 |
| C | 102 | 22.9401 | 9.6763  | 10.8824 |
| C | 103 | 23.8109 | 10.5797 | 10.2838 |
| C | 104 | 23.5458 | 11.1093 | 9.0108  |
| C | 105 | 22.3395 | 10.7415 | 8.3936  |
| C | 106 | 21.4421 | 9.8569  | 9.0040  |



|    |     |         |         |         |
|----|-----|---------|---------|---------|
| C  | 107 | 19.5363 | 9.9289  | 16.7223 |
| C  | 108 | 17.4105 | 4.0471  | 8.0019  |
| C  | 109 | 24.5716 | 11.9763 | 8.3193  |
| C  | 110 | 20.9177 | 10.2279 | 17.3516 |
| C  | 111 | 25.5007 | 11.1980 | 7.3541  |
| C  | 112 | 17.8187 | 2.7653  | 8.7717  |
| H  | 113 | 17.8617 | 7.3675  | 11.2613 |
| H  | 114 | 16.5753 | 5.6429  | 10.0524 |
| H  | 115 | 19.7492 | 5.2717  | 7.1729  |
| H  | 116 | 21.0870 | 6.9034  | 8.4278  |
| H  | 117 | 19.3690 | 6.7555  | 13.2973 |
| H  | 118 | 18.9230 | 7.5110  | 15.5848 |
| H  | 119 | 20.2492 | 11.4723 | 14.5469 |
| H  | 120 | 20.6335 | 10.7418 | 12.2306 |
| H  | 121 | 23.2073 | 9.2272  | 11.8400 |
| H  | 122 | 24.7381 | 10.8429 | 10.7964 |
| H  | 123 | 22.0926 | 11.1510 | 7.4108  |
| H  | 124 | 20.5129 | 9.5962  | 8.4947  |
| H  | 125 | 19.0466 | 9.1198  | 17.2863 |
| H  | 126 | 25.1778 | 12.4880 | 9.0829  |
| H  | 127 | 20.7637 | 10.5410 | 18.3977 |
| H  | 128 | 21.3599 | 11.0972 | 16.8366 |
| H  | 129 | 26.2018 | 11.9132 | 6.8923  |
| H  | 130 | 24.8838 | 10.7957 | 6.5349  |
| H  | 131 | 23.5175 | 9.0857  | 18.8012 |
| H  | 132 | 27.2473 | 11.4267 | 9.3642  |
| H  | 133 | 18.9047 | 10.8232 | 16.8465 |
| H  | 134 | 24.0668 | 12.7695 | 7.7463  |
| H  | 135 | 29.5904 | -0.2750 | 14.1823 |
| H  | 136 | 31.5667 | 2.7037  | 15.9520 |
| H  | 137 | 18.9432 | 0.7956  | 10.0456 |
| H  | 138 | 20.2143 | 0.3665  | 8.9185  |
| H  | 139 | 19.2644 | 1.8653  | 7.4553  |
| H  | 140 | 19.9343 | 3.1334  | 8.4668  |
| H  | 141 | 32.0259 | 0.7608  | 14.5092 |
| H  | 142 | 32.2806 | 2.2907  | 13.6867 |
| H  | 143 | 17.6496 | 3.9255  | 6.9334  |
| H  | 144 | 16.3186 | 4.1666  | 8.0712  |
| H  | 145 | 17.1059 | 1.9597  | 8.5297  |
| H  | 146 | 17.7035 | 2.9606  | 9.8507  |
| C  | 147 | 24.5691 | 5.3323  | 10.7640 |
| O  | 148 | 24.5386 | 5.2470  | 9.6003  |
| Rh | 149 | 24.5240 | 5.6804  | 12.6472 |
| H  | 150 | 24.5356 | 7.1908  | 12.1212 |

|                                                      |     |         |         |         |
|------------------------------------------------------|-----|---------|---------|---------|
| C                                                    | 151 | 23.1469 | 6.3226  | 13.7956 |
| O                                                    | 152 | 22.3161 | 6.7635  | 14.4814 |
| <b>HRh(CO)<sub>2</sub>(P-frame)<sub>2</sub>-2(a)</b> |     |         |         |         |
| ATOM                                                 |     | X       | Y       | Z       |
| P                                                    | 1   | 2.9169  | 1.0396  | -0.7850 |
| C                                                    | 2   | 4.2626  | -0.2186 | -0.7688 |
| C                                                    | 3   | 3.1493  | 1.8563  | 0.8556  |
| C                                                    | 4   | 3.4919  | 2.3494  | -1.9538 |
| C                                                    | 5   | 3.9597  | 3.5950  | -1.5094 |
| C                                                    | 6   | 4.2483  | 4.6121  | -2.4187 |
| C                                                    | 7   | 4.0892  | 4.4317  | -3.8035 |
| C                                                    | 8   | 3.6532  | 3.1670  | -4.2458 |
| C                                                    | 9   | 3.3542  | 2.1554  | -3.3426 |
| C                                                    | 10  | 2.0663  | 2.4880  | 1.4841  |
| C                                                    | 11  | 2.2271  | 3.1255  | 2.7125  |
| C                                                    | 12  | 3.4745  | 3.1702  | 3.3639  |
| C                                                    | 13  | 4.5601  | 2.5392  | 2.7238  |
| C                                                    | 14  | 4.4029  | 1.9038  | 1.4968  |
| C                                                    | 15  | 4.2322  | -1.1574 | 0.2764  |
| C                                                    | 16  | 5.1568  | -2.1917 | 0.3380  |
| C                                                    | 17  | 6.1197  | -2.3751 | -0.6663 |
| C                                                    | 18  | 6.1421  | -1.4412 | -1.7114 |
| C                                                    | 19  | 5.2392  | -0.3713 | -1.7612 |
| C                                                    | 20  | 3.5829  | 3.8603  | 4.6527  |
| C                                                    | 21  | 4.3566  | 5.5531  | -4.7104 |
| C                                                    | 22  | 7.1378  | -3.4990 | -0.5811 |
| C                                                    | 23  | 4.6984  | 4.0823  | 5.3702  |
| C                                                    | 24  | 4.0989  | 5.6098  | -6.0290 |
| H                                                    | 25  | 4.0803  | 3.7865  | -0.4441 |
| H                                                    | 26  | 4.5907  | 5.5795  | -2.0469 |
| H                                                    | 27  | 3.5314  | 2.9748  | -5.3119 |
| H                                                    | 28  | 2.9843  | 1.2043  | -3.7223 |
| H                                                    | 29  | 1.0856  | 2.4663  | 1.0104  |
| H                                                    | 30  | 1.3666  | 3.6037  | 3.1844  |
| H                                                    | 31  | 5.5453  | 2.5444  | 3.1899  |
| H                                                    | 32  | 5.2641  | 1.4260  | 1.0304  |
| H                                                    | 33  | 3.4764  | -1.0777 | 1.0591  |
| H                                                    | 34  | 5.1050  | -2.8808 | 1.1803  |
| H                                                    | 35  | 6.8877  | -1.5394 | -2.5039 |
| H                                                    | 36  | 5.3029  | 0.3461  | -2.5799 |
| H                                                    | 37  | 2.6348  | 4.2367  | 5.0468  |
| H                                                    | 38  | 4.7957  | 6.4323  | -4.2308 |
| H                                                    | 39  | 4.6505  | 4.6133  | 6.3204  |
| H                                                    | 40  | 5.6853  | 3.7519  | 5.0440  |

|   |    |         |         |         |
|---|----|---------|---------|---------|
| H | 41 | 3.6367  | 4.7830  | -6.5696 |
| H | 42 | 4.3276  | 6.5057  | -6.6053 |
| P | 43 | -3.6134 | 1.5446  | 0.7325  |
| C | 44 | -3.4919 | 3.3673  | 0.8554  |
| C | 45 | -4.1768 | 0.9356  | 2.3653  |
| C | 46 | -4.9034 | 1.1456  | -0.5108 |
| C | 47 | -6.0730 | 0.4111  | -0.2576 |
| C | 48 | -6.7317 | -0.2575 | -1.2981 |
| C | 49 | -6.2575 | -0.2040 | -2.6154 |
| C | 50 | -5.1794 | 0.6582  | -2.8814 |
| C | 51 | -4.5028 | 1.3029  | -1.8549 |
| C | 52 | -4.0789 | 1.7164  | 3.5292  |
| C | 53 | -4.0761 | 1.1142  | 4.7901  |
| C | 54 | -4.2086 | -0.2735 | 4.9403  |
| C | 55 | -4.4473 | -1.0307 | 3.7820  |
| C | 56 | -4.3933 | -0.4484 | 2.5184  |
| C | 57 | -2.2808 | 3.8685  | 1.3643  |
| C | 58 | -2.0145 | 5.2324  | 1.3653  |
| C | 59 | -2.9310 | 6.1528  | 0.8237  |
| C | 60 | -4.1462 | 5.6465  | 0.3235  |
| C | 61 | -4.4253 | 4.2827  | 0.3402  |
| C | 62 | -3.9271 | -0.9292 | 6.2700  |
| C | 63 | -6.8031 | -1.0804 | -3.7209 |
| C | 64 | -2.5710 | 7.5732  | 0.7862  |
| C | 65 | -2.4545 | -1.4173 | 6.3397  |
| C | 66 | -3.2133 | 8.5662  | 0.1426  |
| C | 67 | -5.7361 | -1.9817 | -4.4093 |
| H | 68 | -6.4382 | 0.3066  | 0.7649  |
| H | 69 | -7.6046 | -0.8727 | -1.0677 |
| H | 70 | -4.8117 | 0.7635  | -3.9038 |
| H | 71 | -3.6063 | 1.8799  | -2.0844 |
| H | 72 | -3.9506 | 2.7962  | 3.4484  |
| H | 73 | -3.9338 | 1.7346  | 5.6778  |
| H | 74 | -4.6123 | -2.1061 | 3.8613  |
| H | 75 | -4.4789 | -1.0898 | 1.6404  |
| H | 76 | -1.5285 | 3.1694  | 1.7343  |
| H | 77 | -1.0610 | 5.5961  | 1.7527  |
| H | 78 | -4.8899 | 6.3350  | -0.0788 |
| H | 79 | -5.3715 | 3.9187  | -0.0613 |
| H | 80 | -4.6059 | -1.7787 | 6.4474  |
| H | 81 | -7.2487 | -0.4298 | -4.4909 |
| H | 82 | -1.6562 | 7.8220  | 1.3328  |
| H | 83 | -2.1014 | -1.3843 | 7.3827  |
| H | 84 | -1.8311 | -0.7049 | 5.7768  |

|   |     |         |         |         |
|---|-----|---------|---------|---------|
| H | 85  | -4.1145 | 8.3959  | -0.4475 |
| H | 86  | -2.8366 | 9.5881  | 0.1761  |
| H | 87  | -4.7398 | -1.5346 | -4.2741 |
| H | 88  | -5.9227 | -1.9729 | -5.4938 |
| P | 89  | 0.3177  | -1.9798 | -0.5869 |
| C | 90  | -1.2785 | -2.5953 | -1.2782 |
| C | 91  | 0.0447  | -2.3284 | 1.2118  |
| C | 92  | 1.5932  | -3.2256 | -1.0776 |
| C | 93  | 2.1093  | -4.2038 | -0.2147 |
| C | 94  | 3.2347  | -4.9555 | -0.5723 |
| C | 95  | 3.8893  | -4.7435 | -1.7915 |
| C | 96  | 3.3210  | -3.8190 | -2.6798 |
| C | 97  | 2.2039  | -3.0720 | -2.3327 |
| C | 98  | 0.5342  | -1.4768 | 2.2096  |
| C | 99  | 0.2901  | -1.7419 | 3.5621  |
| C | 100 | -0.4529 | -2.8590 | 3.9614  |
| C | 101 | -0.9324 | -3.7151 | 2.9556  |
| C | 102 | -0.6950 | -3.4562 | 1.6084  |
| C | 103 | -2.4036 | -1.8232 | -0.9555 |
| C | 104 | -3.6720 | -2.2200 | -1.3576 |
| C | 105 | -3.8704 | -3.3745 | -2.1305 |
| C | 106 | -2.7383 | -4.1257 | -2.4782 |
| C | 107 | -1.4559 | -3.7517 | -2.0509 |
| C | 108 | -0.7718 | -3.1562 | 5.4108  |
| C | 109 | 5.1819  | -5.4179 | -2.1941 |
| C | 110 | -5.2725 | -3.7802 | -2.5316 |
| C | 111 | -2.2396 | -2.8360 | 5.7929  |
| C | 112 | -5.6902 | -3.4571 | -3.9824 |
| H | 113 | 1.6598  | -4.3570 | 0.7659  |
| H | 114 | 3.6229  | -5.6859 | 0.1393  |
| H | 115 | 3.8031  | -3.6405 | -3.6427 |
| H | 116 | 1.8362  | -2.3259 | -3.0329 |
| H | 117 | 1.0901  | -0.5809 | 1.9301  |
| H | 118 | 0.6763  | -1.0529 | 4.3157  |
| H | 119 | -1.5115 | -4.5996 | 3.2312  |
| H | 120 | -1.0976 | -4.1354 | 0.8562  |
| H | 121 | -2.2824 | -0.9035 | -0.3790 |
| H | 122 | -4.5327 | -1.6172 | -1.0731 |
| H | 123 | -2.8559 | -5.0349 | -3.0727 |
| H | 124 | -0.5968 | -4.3733 | -2.3079 |
| H | 125 | -0.0873 | -2.5994 | 6.0690  |
| H | 126 | -5.9849 | -3.3139 | -1.8336 |
| H | 127 | -2.5908 | -3.5597 | 6.5451  |
| H | 128 | -2.8632 | -2.9938 | 4.9015  |

|                                |     |         |         |         |
|--------------------------------|-----|---------|---------|---------|
| H                              | 129 | -6.6833 | -3.9072 | -4.1514 |
| H                              | 130 | -5.0017 | -3.9823 | -4.6651 |
| H                              | 131 | -4.1099 | -0.2048 | 7.0771  |
| H                              | 132 | -7.6286 | -1.6979 | -3.3331 |
| H                              | 133 | -0.5802 | -4.2245 | 5.5944  |
| H                              | 134 | -5.3809 | -4.8682 | -2.3954 |
| C                              | 135 | 6.6286  | -4.8588 | -0.0539 |
| H                              | 136 | 7.9379  | -3.1571 | 0.0973  |
| H                              | 137 | 7.6239  | -3.6265 | -1.5612 |
| H                              | 138 | 5.8351  | -4.6842 | 0.6854  |
| H                              | 139 | 7.4451  | -5.3402 | 0.5057  |
| C                              | 140 | 6.1428  | -5.8879 | -1.0931 |
| H                              | 141 | 5.7176  | -4.7262 | -2.8634 |
| H                              | 142 | 4.9446  | -6.2951 | -2.8210 |
| H                              | 143 | 7.0221  | -6.3126 | -1.6045 |
| H                              | 144 | 5.6929  | -6.7324 | -0.5463 |
| C                              | 145 | 0.8160  | -0.1029 | -3.1642 |
| O                              | 146 | 0.7732  | -0.2891 | -4.3128 |
| Rh                             | 147 | 0.7169  | 0.2703  | -1.2690 |
| H                              | 148 | 0.4058  | 0.5632  | 0.2772  |
| C                              | 149 | -0.5087 | 1.7103  | -1.5191 |
| O                              | 150 | -1.2077 | 2.6228  | -1.7030 |
| <b>HRh(CO)<sub>2</sub>(P-</b>  |     |         |         |         |
| <b>frame)<sub>2</sub>-2(b)</b> |     |         |         |         |
| ATOM                           | X   | Y       | Z       |         |
| P                              | 1   | 22.1127 | 4.4137  | 20.0617 |
| C                              | 2   | 23.7413 | 3.6933  | 19.5912 |
| C                              | 3   | 20.9315 | 3.0131  | 19.9398 |
| C                              | 4   | 22.2428 | 4.7326  | 21.8666 |
| C                              | 5   | 21.5684 | 4.0082  | 22.8605 |
| C                              | 6   | 21.6177 | 4.4182  | 24.1934 |
| C                              | 7   | 22.3515 | 5.5501  | 24.5914 |
| C                              | 8   | 23.0227 | 6.2760  | 23.5871 |
| C                              | 9   | 22.9582 | 5.8842  | 22.2564 |
| C                              | 10  | 19.6112 | 3.3495  | 19.5992 |
| C                              | 11  | 18.6368 | 2.3659  | 19.4573 |
| C                              | 12  | 18.9444 | 1.0040  | 19.6321 |
| C                              | 13  | 20.2734 | 0.6714  | 19.9666 |
| C                              | 14  | 21.2462 | 1.6531  | 20.1213 |
| C                              | 15  | 23.8683 | 3.1684  | 18.2903 |
| C                              | 16  | 25.1187 | 2.8837  | 17.7473 |
| C                              | 17  | 26.2993 | 3.1396  | 18.4651 |
| C                              | 18  | 26.1662 | 3.6052  | 19.7785 |
| C                              | 19  | 24.9137 | 3.8688  | 20.3415 |
| C                              | 20  | 17.8841 | 0.0085  | 19.4505 |

|   |    |         |         |         |
|---|----|---------|---------|---------|
| C | 21 | 22.3749 | 5.9290  | 26.0082 |
| C | 22 | 27.6615 | 3.0008  | 17.8191 |
| C | 23 | 17.9991 | -1.3312 | 19.4734 |
| C | 24 | 23.1009 | 6.9092  | 26.5753 |
| H | 25 | 20.9903 | 3.1230  | 22.5931 |
| H | 26 | 21.0779 | 3.8444  | 24.9494 |
| H | 27 | 23.5817 | 7.1779  | 23.8377 |
| H | 28 | 23.4451 | 6.4968  | 21.4973 |
| H | 29 | 19.3570 | 4.3966  | 19.4264 |
| H | 30 | 17.6181 | 2.6508  | 19.1888 |
| H | 31 | 20.5460 | -0.3728 | 20.1209 |
| H | 32 | 22.2667 | 1.3678  | 20.3799 |
| H | 33 | 22.9752 | 3.0120  | 17.6823 |
| H | 34 | 25.1737 | 2.4989  | 16.7273 |
| H | 35 | 27.0648 | 3.7881  | 20.3722 |
| H | 36 | 24.8605 | 4.2507  | 21.3613 |
| H | 37 | 16.8926 | 0.4339  | 19.2693 |
| H | 38 | 21.7335 | 5.3216  | 26.6529 |
| H | 39 | 18.9495 | -1.8403 | 19.6361 |
| H | 40 | 17.1241 | -1.9626 | 19.3232 |
| H | 41 | 23.7776 | 7.5402  | 25.9976 |
| H | 42 | 23.0438 | 7.0986  | 27.6464 |
| P | 43 | 21.6474 | 10.6816 | 18.9631 |
| C | 44 | 20.3548 | 10.3233 | 20.2296 |
| C | 45 | 20.6881 | 10.9863 | 17.4224 |
| C | 46 | 22.3241 | 12.3107 | 19.5008 |
| C | 47 | 22.1131 | 13.5424 | 18.8659 |
| C | 48 | 22.8455 | 14.6736 | 19.2449 |
| C | 49 | 23.7887 | 14.6199 | 20.2767 |
| C | 50 | 23.9004 | 13.4139 | 20.9874 |
| C | 51 | 23.1946 | 12.2819 | 20.6039 |
| C | 52 | 19.4473 | 10.3709 | 17.2007 |
| C | 53 | 18.8653 | 10.3902 | 15.9292 |
| C | 54 | 19.4820 | 11.0328 | 14.8461 |
| C | 55 | 20.6862 | 11.7072 | 15.0950 |
| C | 56 | 21.2893 | 11.6631 | 16.3496 |
| C | 57 | 20.2691 | 9.0500  | 20.8091 |
| C | 58 | 19.2931 | 8.7709  | 21.7645 |
| C | 59 | 18.3739 | 9.7471  | 22.1865 |
| C | 60 | 18.4724 | 11.0294 | 21.6042 |
| C | 61 | 19.4407 | 11.3110 | 20.6473 |
| C | 62 | 18.9218 | 10.8989 | 13.4481 |
| C | 63 | 24.6825 | 15.7897 | 20.6329 |
| C | 64 | 17.3807 | 9.3879  | 23.2033 |

|   |     |         |         |         |
|---|-----|---------|---------|---------|
| C | 65  | 19.6738 | 9.8159  | 12.6247 |
| C | 66  | 16.4660 | 10.1887 | 23.7775 |
| C | 67  | 26.1938 | 15.4387 | 20.6576 |
| H | 68  | 21.4019 | 13.6222 | 18.0448 |
| H | 69  | 22.6951 | 15.6078 | 18.6995 |
| H | 70  | 24.5828 | 13.3439 | 21.8357 |
| H | 71  | 23.3479 | 11.3558 | 21.1547 |
| H | 72  | 18.9426 | 9.8512  | 18.0149 |
| H | 73  | 17.9179 | 9.8705  | 15.7741 |
| H | 74  | 21.1853 | 12.2438 | 14.2872 |
| H | 75  | 22.2476 | 12.1533 | 16.4933 |
| H | 76  | 20.9837 | 8.2810  | 20.5154 |
| H | 77  | 19.2521 | 7.7721  | 22.2028 |
| H | 78  | 17.7792 | 11.8153 | 21.9039 |
| H | 79  | 19.4919 | 12.3142 | 20.2218 |
| H | 80  | 18.9657 | 11.8639 | 12.9182 |
| H | 81  | 24.3941 | 16.1455 | 21.6351 |
| H | 82  | 17.4152 | 8.3411  | 23.5185 |
| H | 83  | 18.9642 | 9.3138  | 11.9485 |
| H | 84  | 20.0224 | 9.0472  | 13.3290 |
| H | 85  | 16.3705 | 11.2466 | 23.5297 |
| H | 86  | 15.7744 | 9.7997  | 24.5243 |
| H | 87  | 26.2986 | 14.3619 | 20.8531 |
| H | 88  | 26.6645 | 15.9443 | 21.5137 |
| P | 89  | 24.8247 | 9.5067  | 17.0500 |
| C | 90  | 25.4893 | 11.2260 | 17.1785 |
| C | 91  | 24.2125 | 9.3620  | 15.3080 |
| C | 92  | 26.3485 | 8.4498  | 17.0343 |
| C | 93  | 27.0939 | 8.2385  | 15.8614 |
| C | 94  | 28.1552 | 7.3335  | 15.8410 |
| C | 95  | 28.5110 | 6.6011  | 16.9850 |
| C | 96  | 27.8031 | 6.8605  | 18.1641 |
| C | 97  | 26.7366 | 7.7606  | 18.1910 |
| C | 98  | 23.2396 | 8.3836  | 15.0609 |
| C | 99  | 22.5974 | 8.2927  | 13.8279 |
| C | 100 | 22.8710 | 9.2087  | 12.8036 |
| C | 101 | 23.9167 | 10.1211 | 13.0149 |
| C | 102 | 24.5926 | 10.1872 | 14.2350 |
| C | 103 | 24.8625 | 12.3010 | 16.5287 |
| C | 104 | 25.2069 | 13.6165 | 16.8194 |
| C | 105 | 26.1910 | 13.9277 | 17.7676 |
| C | 106 | 26.8502 | 12.8552 | 18.3850 |
| C | 107 | 26.5068 | 11.5294 | 18.1000 |
| C | 108 | 21.9990 | 9.3148  | 11.5757 |

|                                              |     |         |         |         |
|----------------------------------------------|-----|---------|---------|---------|
| C                                            | 109 | 29.5573 | 5.5113  | 16.9336 |
| C                                            | 110 | 26.4871 | 15.3886 | 18.0371 |
| C                                            | 111 | 20.8585 | 10.3425 | 11.7936 |
| C                                            | 112 | 27.0197 | 15.8098 | 19.4148 |
| H                                            | 113 | 26.8266 | 8.7607  | 14.9428 |
| H                                            | 114 | 28.6968 | 7.1717  | 14.9068 |
| H                                            | 115 | 28.0545 | 6.3129  | 19.0745 |
| H                                            | 116 | 26.1764 | 7.8957  | 19.1141 |
| H                                            | 117 | 22.9530 | 7.7040  | 15.8598 |
| H                                            | 118 | 21.8346 | 7.5253  | 13.6840 |
| H                                            | 119 | 24.1951 | 10.8128 | 12.2165 |
| H                                            | 120 | 25.3957 | 10.9140 | 14.3558 |
| H                                            | 121 | 24.0864 | 12.1119 | 15.7917 |
| H                                            | 122 | 24.6848 | 14.4289 | 16.3098 |
| H                                            | 123 | 27.6406 | 13.0471 | 19.1126 |
| H                                            | 124 | 27.0249 | 10.7216 | 18.6184 |
| H                                            | 125 | 21.5740 | 8.3334  | 11.3134 |
| H                                            | 126 | 25.5674 | 15.9548 | 17.8221 |
| H                                            | 127 | 20.4890 | 10.6869 | 10.8148 |
| H                                            | 128 | 21.3003 | 11.2251 | 12.2791 |
| H                                            | 129 | 27.1392 | 16.9052 | 19.3822 |
| H                                            | 130 | 28.0376 | 15.4107 | 19.5558 |
| H                                            | 131 | 17.8584 | 10.6286 | 13.5172 |
| H                                            | 132 | 24.4889 | 16.6315 | 19.9502 |
| H                                            | 133 | 22.6105 | 9.6367  | 10.7193 |
| H                                            | 134 | 27.2171 | 15.7377 | 17.2864 |
| C                                            | 135 | 27.7533 | 3.7093  | 16.4462 |
| H                                            | 136 | 27.9220 | 1.9356  | 17.6984 |
| H                                            | 137 | 28.4104 | 3.4133  | 18.5115 |
| H                                            | 138 | 27.0172 | 4.5260  | 16.4218 |
| H                                            | 139 | 27.4495 | 3.0073  | 15.6553 |
| C                                            | 140 | 29.1292 | 4.2875  | 16.0896 |
| H                                            | 141 | 29.7945 | 5.1972  | 17.9609 |
| H                                            | 142 | 30.4946 | 5.9092  | 16.5135 |
| H                                            | 143 | 29.9092 | 3.5123  | 16.1686 |
| H                                            | 144 | 29.1068 | 4.5898  | 15.0305 |
| C                                            | 145 | 24.0822 | 9.0080  | 20.4261 |
| O                                            | 146 | 24.6629 | 8.9945  | 21.4414 |
| Rh                                           | 147 | 23.2136 | 8.8374  | 18.7310 |
| H                                            | 148 | 24.0151 | 7.4633  | 18.6612 |
| C                                            | 149 | 21.8139 | 7.7352  | 18.0484 |
| O                                            | 150 | 20.9698 | 7.0562  | 17.6170 |
| <b>HRh(CO)(P-frame)<sub>3</sub>-1(a)(IS)</b> |     |         |         |         |
| ATOM                                         | X   | Y       | Z       |         |

|     |         |         |         |
|-----|---------|---------|---------|
| P1  | 22.9739 | 5.9891  | 15.5343 |
| C2  | 22.2363 | 5.1733  | 14.0397 |
| C3  | 24.2185 | 4.7783  | 16.1486 |
| C4  | 24.0113 | 7.2553  | 14.6711 |
| C5  | 25.4075 | 7.2094  | 14.5592 |
| C6  | 26.0952 | 8.1882  | 13.8381 |
| C7  | 25.4230 | 9.2368  | 13.1873 |
| C8  | 24.0163 | 9.2694  | 13.2977 |
| C9  | 23.3314 | 8.3024  | 14.0198 |
| C10 | 25.1559 | 5.2052  | 17.1060 |
| C11 | 26.0727 | 4.3149  | 17.6541 |
| C12 | 26.0532 | 2.9507  | 17.3201 |
| C13 | 25.1119 | 2.5287  | 16.3713 |
| C14 | 24.2148 | 3.4262  | 15.7827 |
| C15 | 20.8986 | 4.7687  | 14.0693 |
| C16 | 20.2516 | 4.3562  | 12.9045 |
| C17 | 20.8987 | 4.3772  | 11.6645 |
| C18 | 22.2637 | 4.7112  | 11.6487 |
| C19 | 22.9251 | 5.0964  | 12.8145 |
| C20 | 26.9427 | 1.9508  | 18.0237 |
| C21 | 26.1905 | 10.2188 | 12.4163 |
| C22 | 20.1114 | 4.1537  | 10.3939 |
| C23 | 26.4934 | 1.6708  | 19.4819 |
| C24 | 20.0788 | 5.3780  | 9.4447  |
| C25 | 25.7270 | 11.3259 | 11.8097 |
| H26 | 25.9674 | 6.3992  | 15.0244 |
| H27 | 27.1829 | 8.1282  | 13.7630 |
| H28 | 23.4514 | 10.0535 | 12.7931 |
| H29 | 22.2419 | 8.3347  | 14.0642 |
| H30 | 25.1636 | 6.2439  | 17.4377 |
| H31 | 26.7954 | 4.6869  | 18.3801 |
| H32 | 25.0754 | 1.4754  | 16.0848 |
| H33 | 23.5023 | 3.0672  | 15.0396 |
| H34 | 20.3383 | 4.8447  | 15.0003 |
| H35 | 19.1990 | 4.0747  | 12.9515 |
| H36 | 22.8105 | 4.7108  | 10.7032 |
| H37 | 23.9732 | 5.3916  | 12.7602 |
| H38 | 27.9889 | 2.2970  | 18.0221 |
| H39 | 27.2610 | 10.0055 | 12.3465 |
| H40 | 19.0852 | 3.8688  | 10.6687 |
| H41 | 26.7496 | 0.6326  | 19.7414 |
| H42 | 25.3955 | 1.7273  | 19.5083 |
| H43 | 19.3400 | 5.1781  | 8.6507  |
| H44 | 21.0534 | 5.4519  | 8.9363  |

|      |         |         |         |
|------|---------|---------|---------|
| H45  | 24.6779 | 11.6225 | 11.8431 |
| H46  | 26.3968 | 11.9782 | 11.2501 |
| Rh47 | 21.4871 | 6.7892  | 17.1552 |
| P48  | 22.2522 | 7.3174  | 19.3374 |
| C49  | 23.3816 | 6.0768  | 20.1163 |
| C50  | 20.9382 | 7.5267  | 20.6339 |
| C51  | 23.1968 | 8.9064  | 19.4557 |
| C52  | 23.0619 | 9.8278  | 20.5052 |
| C53  | 23.6290 | 11.1037 | 20.4110 |
| C54  | 24.3733 | 11.4933 | 19.2924 |
| C55  | 24.6119 | 10.5225 | 18.3071 |
| C56  | 24.0208 | 9.2648  | 18.3762 |
| C57  | 20.6232 | 6.5308  | 21.5720 |
| C58  | 19.5307 | 6.6773  | 22.4319 |
| C59  | 18.7272 | 7.8266  | 22.4175 |
| C60  | 19.0708 | 8.8353  | 21.5046 |
| C61  | 20.1355 | 8.6801  | 20.6174 |
| C62  | 23.0412 | 4.7145  | 20.0826 |
| C63  | 23.8883 | 3.7514  | 20.6295 |
| C64  | 25.1298 | 4.1003  | 21.1812 |
| C65  | 25.4660 | 5.4617  | 21.2122 |
| C66  | 24.6035 | 6.4366  | 20.7057 |
| C67  | 17.5220 | 7.9304  | 23.3257 |
| C68  | 24.8801 | 12.9081 | 19.1109 |
| C69  | 26.1114 | 3.0551  | 21.6568 |
| C70  | 16.2196 | 7.3643  | 22.7055 |
| C71  | 27.0963 | 2.6102  | 20.5502 |
| C72  | 24.3938 | 13.5988 | 17.8151 |
| H73  | 22.4713 | 9.5761  | 21.3851 |
| H74  | 23.4596 | 11.8182 | 21.2200 |
| H75  | 25.2263 | 10.7663 | 17.4383 |
| H76  | 24.1554 | 8.5693  | 17.5480 |
| H77  | 21.2348 | 5.6321  | 21.6477 |
| H78  | 19.3081 | 5.8787  | 23.1437 |
| H79  | 18.4882 | 9.7586  | 21.4713 |
| H80  | 20.3484 | 9.4752  | 19.9045 |
| H81  | 22.1136 | 4.3937  | 19.6111 |
| H82  | 23.5806 | 2.7046  | 20.6088 |
| H83  | 26.4203 | 5.7694  | 21.6460 |
| H84  | 24.8943 | 7.4861  | 20.7544 |
| H85  | 17.3583 | 8.9790  | 23.6211 |
| H86  | 25.9819 | 12.8775 | 19.0778 |
| H87  | 25.5734 | 2.1761  | 22.0461 |
| H88  | 15.5418 | 7.0665  | 23.5204 |

|      |         |         |         |
|------|---------|---------|---------|
| H89  | 16.4729 | 6.4339  | 22.1774 |
| H90  | 27.9554 | 2.1110  | 21.0246 |
| H91  | 27.5051 | 3.5154  | 20.0777 |
| H92  | 24.4086 | 12.8558 | 17.0066 |
| H93  | 25.1431 | 14.3501 | 17.5226 |
| P94  | 19.6544 | 8.1912  | 16.6325 |
| C95  | 20.0632 | 9.9793  | 16.9369 |
| C96  | 18.1042 | 7.9180  | 17.5967 |
| C97  | 19.0186 | 8.0950  | 14.8997 |
| C98  | 18.1764 | 7.0201  | 14.5676 |
| C99  | 17.9052 | 6.7067  | 13.2367 |
| C100 | 18.4891 | 7.4235  | 12.1835 |
| C101 | 19.2352 | 8.5631  | 12.5199 |
| C102 | 19.4945 | 8.8988  | 13.8500 |
| C103 | 18.0763 | 6.9056  | 18.5619 |
| C104 | 16.9843 | 6.7472  | 19.4122 |
| C105 | 15.9073 | 7.6406  | 19.3736 |
| C106 | 15.8970 | 8.6062  | 18.3508 |
| C107 | 16.9620 | 8.7285  | 17.4580 |
| C108 | 19.4209 | 10.7493 | 17.9223 |
| C109 | 19.9680 | 11.9539 | 18.3664 |
| C110 | 21.1660 | 12.4598 | 17.8396 |
| C111 | 21.7349 | 11.7547 | 16.7726 |
| C112 | 21.2127 | 10.5319 | 16.3481 |
| C113 | 14.8802 | 7.6717  | 20.4786 |
| C114 | 18.4069 | 6.9298  | 10.7552 |
| C115 | 21.8071 | 13.6655 | 18.4957 |
| C116 | 15.4648 | 8.3271  | 21.7604 |
| C117 | 23.0359 | 14.3334 | 17.8577 |
| C118 | 19.8055 | 6.7406  | 10.1002 |
| H119 | 17.7545 | 6.3981  | 15.3586 |
| H120 | 17.2739 | 5.8446  | 13.0115 |
| H121 | 19.6584 | 9.1836  | 11.7271 |
| H122 | 20.0834 | 9.7903  | 14.0652 |
| H123 | 18.9444 | 6.2609  | 18.6778 |
| H124 | 17.0062 | 5.9493  | 20.1538 |
| H125 | 15.0473 | 9.2872  | 18.2666 |
| H126 | 16.9237 | 9.4852  | 16.6730 |
| H127 | 18.5120 | 10.3820 | 18.3946 |
| H128 | 19.4719 | 12.4881 | 19.1802 |
| H129 | 22.6394 | 12.1233 | 16.2936 |
| H130 | 21.7712 | 9.9704  | 15.6010 |
| H131 | 14.5234 | 6.6567  | 20.7161 |
| H132 | 17.8094 | 7.6277  | 10.1469 |

|                                              |         |         |         |
|----------------------------------------------|---------|---------|---------|
| H133                                         | 22.0588 | 13.3768 | 19.5301 |
| H134                                         | 14.6470 | 8.8082  | 22.3188 |
| H135                                         | 16.1328 | 9.1415  | 21.4424 |
| H136                                         | 23.1908 | 15.2715 | 18.4151 |
| H137                                         | 22.7863 | 14.6429 | 16.8295 |
| H138                                         | 20.5795 | 6.9134  | 10.8624 |
| H139                                         | 19.9595 | 7.5184  | 9.3367  |
| H140                                         | 17.7346 | 7.3767  | 24.2524 |
| H141                                         | 24.6211 | 13.5152 | 19.9928 |
| H142                                         | 14.0036 | 8.2452  | 20.1430 |
| H143                                         | 21.0328 | 14.4439 | 18.5994 |
| H144                                         | 26.9270 | 1.0094  | 17.4547 |
| H145                                         | 20.5244 | 3.2994  | 9.8326  |
| H146                                         | 26.6901 | 3.4668  | 22.4980 |
| H147                                         | 17.8513 | 5.9798  | 10.7463 |
| H148                                         | 22.2234 | 8.1559  | 16.7900 |
| C149                                         | 20.6854 | 5.0766  | 17.5163 |
| O150                                         | 20.2487 | 4.0104  | 17.7202 |
| C149                                         | 27.4602 | 12.1349 | 15.1668 |
| O150                                         | 28.2127 | 11.2722 | 15.1630 |
| <b>HRh(CO)(P-frame)<sub>3</sub>-1(a)(TS)</b> |         |         |         |
| ATOM                                         | X       | Y       | Z       |
| C149                                         | 27.3481 | 12.0681 | 15.4981 |
| O150                                         | 28.2259 | 11.6417 | 16.0946 |
| P1                                           | 23.9284 | 6.4135  | 15.2848 |
| C2                                           | 22.8925 | 5.7772  | 13.9018 |
| C3                                           | 24.8573 | 4.9468  | 15.8952 |
| C4                                           | 25.2137 | 7.3923  | 14.3997 |
| C5                                           | 26.4605 | 6.9020  | 13.9797 |
| C6                                           | 27.3667 | 7.7363  | 13.3261 |
| C7                                           | 27.0656 | 9.0837  | 13.0511 |
| C8                                           | 25.8122 | 9.5702  | 13.4771 |
| C9                                           | 24.9145 | 8.7446  | 14.1418 |
| C10                                          | 25.8515 | 5.1583  | 16.8667 |
| C11                                          | 26.4891 | 4.0881  | 17.4910 |
| C12                                          | 26.1313 | 2.7619  | 17.2010 |
| C13                                          | 25.1497 | 2.5567  | 16.2220 |
| C14                                          | 24.5245 | 3.6230  | 15.5721 |
| C15                                          | 21.5888 | 5.3733  | 14.2240 |
| C16                                          | 20.7018 | 4.9620  | 13.2321 |
| C17                                          | 21.0612 | 4.9829  | 11.8781 |
| C18                                          | 22.3714 | 5.3737  | 11.5587 |
| C19                                          | 23.2758 | 5.7610  | 12.5511 |
| C20                                          | 26.6937 | 1.5895  | 17.9710 |

|      |         |         |         |
|------|---------|---------|---------|
| C21  | 28.0556 | 9.9158  | 12.3632 |
| C22  | 20.0471 | 4.5916  | 10.8235 |
| C23  | 25.9044 | 1.3161  | 19.2761 |
| C24  | 19.9233 | 5.5209  | 9.6023  |
| C25  | 27.9253 | 11.2010 | 11.9866 |
| H26  | 26.7251 | 5.8623  | 14.1737 |
| H27  | 28.3327 | 7.3367  | 13.0106 |
| H28  | 25.5434 | 10.6103 | 13.2953 |
| H29  | 23.9575 | 9.1495  | 14.4755 |
| H30  | 26.1313 | 6.1760  | 17.1448 |
| H31  | 27.2687 | 4.2921  | 18.2271 |
| H32  | 24.8625 | 1.5356  | 15.9612 |
| H33  | 23.7654 | 3.4227  | 14.8148 |
| H34  | 21.2527 | 5.4207  | 15.2652 |
| H35  | 19.6931 | 4.6612  | 13.5146 |
| H36  | 22.6962 | 5.3915  | 10.5166 |
| H37  | 24.2814 | 6.0724  | 12.2665 |
| H38  | 27.7570 | 1.7553  | 18.2069 |
| H39  | 28.9992 | 9.4080  | 12.1431 |
| H40  | 19.0659 | 4.4937  | 11.3115 |
| H41  | 25.9675 | 0.2451  | 19.5273 |
| H42  | 24.8430 | 1.5247  | 19.0753 |
| H43  | 19.1493 | 5.0986  | 8.9396  |
| H44  | 20.8594 | 5.4809  | 9.0214  |
| H45  | 27.0163 | 11.7767 | 12.1639 |
| H46  | 28.7421 | 11.7180 | 11.4844 |
| Rh47 | 20.8606 | 6.7807  | 17.5257 |
| P48  | 21.8333 | 7.0293  | 19.6096 |
| C49  | 22.7780 | 5.6466  | 20.3820 |
| C50  | 20.4722 | 7.4162  | 20.8004 |
| C51  | 22.9561 | 8.4922  | 19.7631 |
| C52  | 22.8776 | 9.4416  | 20.7909 |
| C53  | 23.5648 | 10.6570 | 20.6899 |
| C54  | 24.3655 | 10.9524 | 19.5808 |
| C55  | 24.5402 | 9.9418  | 18.6209 |
| C56  | 23.8358 | 8.7455  | 18.6976 |
| C57  | 19.9764 | 6.4910  | 21.7296 |
| C58  | 18.8525 | 6.7974  | 22.5040 |
| C59  | 18.1938 | 8.0324  | 22.3967 |
| C60  | 18.7158 | 8.9626  | 21.4854 |
| C61  | 19.8187 | 8.6563  | 20.6914 |
| C62  | 22.4124 | 4.3251  | 20.0846 |
| C63  | 23.1799 | 3.2496  | 20.5323 |
| C64  | 24.3646 | 3.4597  | 21.2533 |

|      |         |         |         |
|------|---------|---------|---------|
| C65  | 24.7085 | 4.7820  | 21.5736 |
| C66  | 23.9290 | 5.8611  | 21.1581 |
| C67  | 16.9438 | 8.3108  | 23.2049 |
| C68  | 25.0136 | 12.3090 | 19.3911 |
| C69  | 25.3099 | 2.3310  | 21.5850 |
| C70  | 15.6295 | 7.9174  | 22.4815 |
| C71  | 26.3809 | 2.1350  | 20.4853 |
| C72  | 24.7136 | 12.9905 | 18.0340 |
| H73  | 22.2374 | 9.2651  | 21.6547 |
| H74  | 23.4439 | 11.4036 | 21.4785 |
| H75  | 25.1937 | 10.1109 | 17.7632 |
| H76  | 23.9148 | 8.0215  | 17.8848 |
| H77  | 20.4707 | 5.5275  | 21.8573 |
| H78  | 18.4865 | 6.0579  | 23.2197 |
| H79  | 18.2452 | 9.9422  | 21.3838 |
| H80  | 20.1742 | 9.3913  | 19.9702 |
| H81  | 21.5339 | 4.1379  | 19.4663 |
| H82  | 22.8706 | 2.2335  | 20.2825 |
| H83  | 25.6177 | 4.9715  | 22.1485 |
| H84  | 24.2332 | 6.8762  | 21.4133 |
| H85  | 16.9043 | 9.3743  | 23.4888 |
| H86  | 26.1061 | 12.1806 | 19.4675 |
| H87  | 24.7532 | 1.3930  | 21.7355 |
| H88  | 14.8707 | 7.6648  | 23.2388 |
| H89  | 15.8171 | 6.9854  | 21.9318 |
| H90  | 27.2652 | 1.6448  | 20.9226 |
| H91  | 26.7104 | 3.1321  | 20.1579 |
| H92  | 24.6710 | 12.2160 | 17.2568 |
| H93  | 25.5762 | 13.6197 | 17.7663 |
| P94  | 19.3482 | 8.2619  | 16.5949 |
| C95  | 19.9603 | 9.9890  | 16.8894 |
| C96  | 17.7235 | 8.2032  | 17.4680 |
| C97  | 18.8579 | 8.1721  | 14.8166 |
| C98  | 18.0635 | 7.0831  | 14.4216 |
| C99  | 17.8260 | 6.8228  | 13.0729 |
| C100 | 18.3987 | 7.6142  | 12.0678 |
| C101 | 19.1379 | 8.7355  | 12.4704 |
| C102 | 19.3635 | 9.0176  | 13.8173 |
| C103 | 17.5191 | 7.2190  | 18.4402 |
| C104 | 16.3813 | 7.2192  | 19.2406 |
| C105 | 15.4449 | 8.2554  | 19.1568 |
| C106 | 15.6099 | 9.2007  | 18.1295 |
| C107 | 16.7155 | 9.1637  | 17.2773 |
| C108 | 19.4120 | 10.8215 | 17.8773 |

|                                              |         |         |         |
|----------------------------------------------|---------|---------|---------|
| C109                                         | 20.1114 | 11.9374 | 18.3398 |
| C110                                         | 21.3703 | 12.2904 | 17.8315 |
| C111                                         | 21.8582 | 11.5281 | 16.7611 |
| C112                                         | 21.1822 | 10.3895 | 16.3196 |
| C113                                         | 14.3995 | 8.4473  | 20.2296 |
| C114                                         | 18.2564 | 7.2841  | 10.5989 |
| C115                                         | 22.1284 | 13.4099 | 18.5166 |
| C116                                         | 15.0448 | 8.9907  | 21.5351 |
| C117                                         | 23.4713 | 13.9023 | 17.9584 |
| C118                                         | 19.5968 | 6.9982  | 9.8681  |
| H119                                         | 17.6447 | 6.4158  | 15.1770 |
| H120                                         | 17.2094 | 5.9648  | 12.7964 |
| H121                                         | 19.5567 | 9.4029  | 11.7142 |
| H122                                         | 19.9401 | 9.9027  | 14.0833 |
| H123                                         | 18.2917 | 6.4707  | 18.6039 |
| H124                                         | 16.2655 | 6.4299  | 19.9826 |
| H125                                         | 14.8713 | 9.9971  | 18.0138 |
| H126                                         | 16.8105 | 9.9123  | 16.4891 |
| H127                                         | 18.4604 | 10.5687 | 18.3414 |
| H128                                         | 19.6814 | 12.5261 | 19.1539 |
| H129                                         | 22.8124 | 11.7784 | 16.2995 |
| H130                                         | 21.6634 | 9.7573  | 15.5732 |
| H131                                         | 13.8685 | 7.5056  | 20.4408 |
| H132                                         | 17.7646 | 8.1347  | 10.1014 |
| H133                                         | 22.2738 | 13.1038 | 19.5664 |
| H134                                         | 14.2962 | 9.5789  | 22.0882 |
| H135                                         | 15.8301 | 9.7034  | 21.2418 |
| H136                                         | 23.7065 | 14.8261 | 18.5119 |
| H137                                         | 23.3408 | 14.2153 | 16.9092 |
| H138                                         | 20.4212 | 7.4582  | 10.4335 |
| H139                                         | 19.5829 | 7.5031  | 8.8901  |
| H140                                         | 17.0098 | 7.7434  | 24.1456 |
| H141                                         | 24.7331 | 12.9754 | 20.2218 |
| H142                                         | 13.6440 | 9.1626  | 19.8748 |
| H143                                         | 21.4569 | 14.2829 | 18.5697 |
| H144                                         | 26.6501 | 0.6948  | 17.3323 |
| H145                                         | 20.2946 | 3.5825  | 10.4508 |
| H146                                         | 25.8149 | 2.5536  | 22.5370 |
| H147                                         | 17.5721 | 6.4300  | 10.4778 |
| H148                                         | 21.7510 | 8.0795  | 17.2752 |
| C149                                         | 19.8899 | 5.1108  | 17.5340 |
| O150                                         | 19.3436 | 4.0847  | 17.4074 |
| <b>HRh(CO)(P-frame)<sub>3</sub>-1(a)(FS)</b> |         |         |         |
| ATOM                                         | X       | Y       | Z       |

|      |         |         |         |
|------|---------|---------|---------|
| C149 | 22.5769 | 8.3152  | 16.2778 |
| O150 | 23.3430 | 8.9611  | 15.6870 |
| P1   | 23.7482 | 5.5737  | 14.6312 |
| C2   | 22.9021 | 4.6865  | 13.2656 |
| C3   | 24.9150 | 4.4421  | 15.4662 |
| C4   | 24.7987 | 6.8048  | 13.7679 |
| C5   | 26.1789 | 6.9493  | 13.9708 |
| C6   | 26.8505 | 8.0825  | 13.5107 |
| C7   | 26.1793 | 9.1127  | 12.8307 |
| C8   | 24.8022 | 8.9353  | 12.5817 |
| C9   | 24.1289 | 7.8184  | 13.0488 |
| C10  | 25.6082 | 4.9635  | 16.5768 |
| C11  | 26.4165 | 4.1516  | 17.3641 |
| C12  | 26.5193 | 2.7726  | 17.1159 |
| C13  | 25.8178 | 2.2563  | 16.0167 |
| C14  | 25.0358 | 3.0727  | 15.1954 |
| C15  | 21.6033 | 4.2149  | 13.5270 |
| C16  | 20.7351 | 3.9046  | 12.4809 |
| C17  | 21.1165 | 4.0838  | 11.1449 |
| C18  | 22.4516 | 4.4358  | 10.8873 |
| C19  | 23.3319 | 4.7300  | 11.9277 |
| C20  | 27.2574 | 1.8515  | 18.0595 |
| C21  | 26.9153 | 10.3149 | 12.4347 |
| C22  | 20.0922 | 4.0568  | 10.0352 |
| C23  | 26.5114 | 1.6768  | 19.4073 |
| C24  | 19.8869 | 5.4537  | 9.3965  |
| C25  | 26.4068 | 11.4609 | 11.9421 |
| H26  | 26.7312 | 6.1786  | 14.5084 |
| H27  | 27.9221 | 8.1808  | 13.6975 |
| H28  | 24.2470 | 9.6986  | 12.0363 |
| H29  | 23.0523 | 7.7390  | 12.8863 |
| H30  | 25.4952 | 6.0168  | 16.8392 |
| H31  | 26.9424 | 4.5982  | 18.2083 |
| H32  | 25.8781 | 1.1871  | 15.8026 |
| H33  | 24.5070 | 2.6384  | 14.3458 |
| H34  | 21.2401 | 4.1744  | 14.5542 |
| H35  | 19.7129 | 3.5987  | 12.7112 |
| H36  | 22.7954 | 4.5344  | 9.8556  |
| H37  | 24.3441 | 5.0643  | 11.6981 |
| H38  | 28.2772 | 2.2258  | 18.2491 |
| H39  | 27.9981 | 10.2547 | 12.5799 |
| H40  | 19.1392 | 3.6769  | 10.4327 |
| H41  | 26.6528 | 0.6485  | 19.7767 |
| H42  | 25.4343 | 1.7848  | 19.2119 |



|      |         |         |         |
|------|---------|---------|---------|
| H43  | 19.0788 | 5.3897  | 8.6495  |
| H44  | 20.7992 | 5.7073  | 8.8341  |
| H45  | 25.3357 | 11.6096 | 11.7949 |
| H46  | 27.0571 | 12.2967 | 11.6871 |
| Rh47 | 21.2334 | 7.6264  | 17.4823 |
| P48  | 22.0899 | 7.5037  | 19.6661 |
| C49  | 23.1927 | 6.1363  | 20.2263 |
| C50  | 20.8355 | 7.6452  | 21.0046 |
| C51  | 23.1414 | 9.0135  | 19.8638 |
| C52  | 22.8014 | 10.0846 | 20.6977 |
| C53  | 23.3662 | 11.3486 | 20.4982 |
| C54  | 24.2907 | 11.5785 | 19.4757 |
| C55  | 24.7416 | 10.4631 | 18.7469 |
| C56  | 24.1751 | 9.2078  | 18.9298 |
| C57  | 20.6678 | 6.6993  | 22.0234 |
| C58  | 19.5830 | 6.7922  | 22.9016 |
| C59  | 18.6616 | 7.8461  | 22.8234 |
| C60  | 18.8727 | 8.8193  | 21.8338 |
| C61  | 19.9137 | 8.7025  | 20.9209 |
| C62  | 22.9013 | 4.7994  | 19.9163 |
| C63  | 23.7268 | 3.7653  | 20.3659 |
| C64  | 24.8828 | 4.0319  | 21.1155 |
| C65  | 25.1718 | 5.3725  | 21.4117 |
| C66  | 24.3432 | 6.4085  | 20.9841 |
| C67  | 17.4285 | 7.8647  | 23.6976 |
| C68  | 24.7386 | 12.9677 | 19.0856 |
| C69  | 25.8369 | 2.9461  | 21.5587 |
| C70  | 16.1675 | 7.3491  | 22.9566 |
| C71  | 26.9412 | 2.6545  | 20.5148 |
| C72  | 24.2471 | 13.4008 | 17.6733 |
| H73  | 22.0451 | 9.9584  | 21.4710 |
| H74  | 23.0397 | 12.1794 | 21.1272 |
| H75  | 25.5018 | 10.5904 | 17.9734 |
| H76  | 24.4888 | 8.3848  | 18.2881 |
| H77  | 21.3741 | 5.8751  | 22.1250 |
| H78  | 19.4543 | 6.0225  | 23.6661 |
| H79  | 18.1894 | 9.6648  | 21.7474 |
| H80  | 20.0027 | 9.4289  | 20.1128 |
| H81  | 22.0254 | 4.5581  | 19.3146 |
| H82  | 23.4626 | 2.7347  | 20.1257 |
| H83  | 26.0641 | 5.6094  | 21.9956 |
| H84  | 24.5911 | 7.4374  | 21.2430 |
| H85  | 17.2425 | 8.8827  | 24.0769 |
| H86  | 25.8395 | 13.0008 | 19.0945 |

|      |         |         |         |
|------|---------|---------|---------|
| H87  | 25.2858 | 2.0187  | 21.7785 |
| H88  | 15.4834 | 6.8870  | 23.6855 |
| H89  | 16.4850 | 6.5397  | 22.2850 |
| H90  | 27.8267 | 2.2439  | 21.0260 |
| H91  | 27.2622 | 3.6125  | 20.0807 |
| H92  | 24.0257 | 12.4971 | 17.0878 |
| H93  | 25.0773 | 13.9009 | 17.1530 |
| P94  | 19.2097 | 8.6323  | 16.7742 |
| C95  | 19.5342 | 10.4459 | 16.8958 |
| C96  | 17.6977 | 8.3418  | 17.7849 |
| C97  | 18.6763 | 8.1983  | 15.0602 |
| C98  | 18.4223 | 6.8352  | 14.8345 |
| C99  | 18.1959 | 6.3502  | 13.5519 |
| C100 | 18.2365 | 7.1931  | 12.4318 |
| C101 | 18.4201 | 8.5635  | 12.6652 |
| C102 | 18.6285 | 9.0643  | 13.9572 |
| C103 | 17.6814 | 7.2099  | 18.6077 |
| C104 | 16.6491 | 7.0030  | 19.5211 |
| C105 | 15.6406 | 7.9602  | 19.6940 |
| C106 | 15.6159 | 9.0515  | 18.8080 |
| C107 | 16.6098 | 9.2283  | 17.8455 |
| C108 | 19.2103 | 11.1098 | 18.0943 |
| C109 | 19.9120 | 12.2427 | 18.4923 |
| C110 | 20.9466 | 12.7877 | 17.7146 |
| C111 | 21.1712 | 12.2072 | 16.4599 |
| C112 | 20.4885 | 11.0523 | 16.0598 |
| C113 | 14.6981 | 7.9097  | 20.8735 |
| C114 | 18.2042 | 6.6059  | 11.0396 |
| C115 | 21.7347 | 13.9486 | 18.2888 |
| C116 | 15.3883 | 8.4210  | 22.1668 |
| C117 | 23.0525 | 14.3702 | 17.6261 |
| C118 | 19.6141 | 6.5931  | 10.3911 |
| H119 | 18.4322 | 6.1322  | 15.6677 |
| H120 | 18.0209 | 5.2825  | 13.4092 |
| H121 | 18.4216 | 9.2601  | 11.8242 |
| H122 | 18.7698 | 10.1370 | 14.0939 |
| H123 | 18.5242 | 6.5173  | 18.5724 |
| H124 | 16.6702 | 6.1125  | 20.1493 |
| H125 | 14.8172 | 9.7920  | 18.8907 |
| H126 | 16.5652 | 10.0880 | 17.1756 |
| H127 | 18.4617 | 10.6922 | 18.7654 |
| H128 | 19.6802 | 12.6935 | 19.4601 |
| H129 | 21.9353 | 12.6115 | 15.7952 |
| H130 | 20.7875 | 10.5715 | 15.1289 |

|      |         |         |         |
|------|---------|---------|---------|
| H131 | 14.3203 | 6.8874  | 21.0337 |
| H132 | 17.5122 | 7.1694  | 10.3944 |
| H133 | 21.9223 | 13.7225 | 19.3511 |
| H134 | 14.6313 | 8.8668  | 22.8312 |
| H135 | 16.0588 | 9.2441  | 21.8815 |
| H136 | 23.3603 | 15.3141 | 18.1066 |
| H137 | 22.8638 | 14.6304 | 16.5717 |
| H138 | 20.3699 | 6.5487  | 11.1882 |
| H139 | 19.7763 | 7.5542  | 9.8802  |
| H140 | 17.6129 | 7.2347  | 24.5797 |
| H141 | 24.4070 | 13.6942 | 19.8434 |
| H142 | 13.8218 | 8.5382  | 20.6583 |
| H143 | 21.0722 | 14.8317 | 18.3012 |
| H144 | 27.3731 | 0.8729  | 17.5729 |
| H145 | 20.3987 | 3.3553  | 9.2431  |
| H146 | 26.3085 | 3.2614  | 22.5014 |
| H147 | 17.8104 | 5.5802  | 11.0980 |
| H148 | 21.3837 | 9.1307  | 17.9726 |
| C149 | 20.9107 | 5.7564  | 17.0928 |
| O150 | 20.6959 | 4.6276  | 16.8830 |

**HRh(CO)(P-frame)<sub>3</sub>-1(b)(IS)**

ATOM X Y Z

|     |         |        |         |
|-----|---------|--------|---------|
| P1  | 23.6988 | 3.8171 | 12.8501 |
| C2  | 23.0657 | 3.7227 | 14.5856 |
| C3  | 25.1182 | 2.6118 | 12.8915 |
| C4  | 22.3806 | 2.8926 | 11.9435 |
| C5  | 22.6778 | 1.9466 | 10.9521 |
| C6  | 21.6528 | 1.3121 | 10.2477 |
| C7  | 20.3019 | 1.5867 | 10.5072 |
| C8  | 20.0143 | 2.5297 | 11.5047 |
| C9  | 21.0311 | 3.1828 | 12.1975 |
| C10 | 26.1298 | 2.7520 | 11.9310 |
| C11 | 27.2734 | 1.9614 | 11.9649 |
| C12 | 27.4819 | 1.0222 | 12.9830 |
| C13 | 26.4492 | 0.8463 | 13.9143 |
| C14 | 25.2861 | 1.6211 | 13.8705 |
| C15 | 23.3301 | 4.7769 | 15.4714 |
| C16 | 22.9101 | 4.7234 | 16.8000 |
| C17 | 22.1922 | 3.6192 | 17.2980 |
| C18 | 21.9117 | 2.5697 | 16.3975 |
| C19 | 22.3372 | 2.6181 | 15.0755 |
| C20 | 28.7857 | 0.2530 | 13.0634 |
| C21 | 19.2192 | 0.9295 | 9.6836  |
| C22 | 21.7575 | 3.6139 | 18.6961 |

|      |         |         |         |
|------|---------|---------|---------|
| C23  | 30.0657 | 1.1105  | 12.8948 |
| C24  | 21.1101 | 2.6297  | 19.3506 |
| H25  | 23.7150 | 1.6906  | 10.7350 |
| H26  | 21.9146 | 0.5762  | 9.4840  |
| H27  | 18.9784 | 2.7644  | 11.7525 |
| H28  | 20.7522 | 3.9109  | 12.9588 |
| H29  | 26.0456 | 3.5248  | 11.1708 |
| H30  | 28.0354 | 2.1158  | 11.1996 |
| H31  | 26.5660 | 0.1121  | 14.7151 |
| H32  | 24.5318 | 1.4774  | 14.6433 |
| H33  | 23.8437 | 5.6680  | 15.1086 |
| H34  | 23.1357 | 5.5617  | 17.4616 |
| H35  | 21.3406 | 1.7041  | 16.7342 |
| H36  | 22.0836 | 1.7957  | 14.4067 |
| H37  | 28.7779 | -0.5093 | 12.2671 |
| C38  | 18.7852 | 1.7788  | 8.4646  |
| H39  | 21.9989 | 4.5244  | 19.2527 |
| H40  | 29.8325 | 1.9814  | 12.2665 |
| H41  | 30.8082 | 0.5277  | 12.3289 |
| H42  | 20.8372 | 1.6865  | 18.8756 |
| H43  | 20.8390 | 2.7446  | 20.3994 |
| Rh44 | 24.3114 | 5.9411  | 11.8120 |
| P45  | 26.0753 | 6.7480  | 13.2482 |
| C46  | 27.3420 | 5.5840  | 13.9107 |
| C47  | 25.5558 | 7.6934  | 14.7577 |
| C48  | 26.9993 | 8.0006  | 12.2494 |
| C49  | 26.9779 | 9.3630  | 12.5707 |
| C50  | 27.2239 | 10.3281 | 11.5879 |
| C51  | 27.5220 | 9.9678  | 10.2694 |
| C52  | 27.7218 | 8.6014  | 10.0047 |
| C53  | 27.4497 | 7.6344  | 10.9667 |
| C54  | 26.1023 | 7.5961  | 16.0453 |
| C55  | 25.4620 | 8.2125  | 17.1310 |
| C56  | 24.2929 | 8.9711  | 16.9683 |
| C57  | 23.8116 | 9.1409  | 15.6602 |
| C58  | 24.4134 | 8.4893  | 14.5945 |
| C59  | 26.9261 | 4.6458  | 14.8703 |
| C60  | 27.7827 | 3.6421  | 15.3042 |
| C61  | 29.0750 | 3.5015  | 14.7806 |
| C62  | 29.5066 | 4.4647  | 13.8575 |
| C63  | 28.6570 | 5.4927  | 13.4306 |
| C64  | 23.5041 | 9.4973  | 18.1504 |
| C65  | 27.4867 | 10.9760 | 9.1409  |
| C66  | 29.9187 | 2.3285  | 15.2329 |

|      |         |         |         |
|------|---------|---------|---------|
| C67  | 22.0158 | 9.0539  | 18.1253 |
| C68  | 30.7645 | 1.5958  | 14.1760 |
| C69  | 26.6197 | 10.4904 | 7.9442  |
| H70  | 26.6737 | 9.6839  | 13.5665 |
| H71  | 27.1070 | 11.3841 | 11.8417 |
| H72  | 28.0074 | 8.2786  | 9.0024  |
| H73  | 27.4856 | 6.5825  | 10.6822 |
| H74  | 27.0051 | 7.0103  | 16.2177 |
| H75  | 25.8743 | 8.0759  | 18.1336 |
| H76  | 22.9154 | 9.7289  | 15.4722 |
| H77  | 23.9595 | 8.5398  | 13.6082 |
| H78  | 25.9138 | 4.6791  | 15.2709 |
| H79  | 27.4218 | 2.9163  | 16.0342 |
| H80  | 30.5174 | 4.4147  | 13.4476 |
| H81  | 29.0226 | 6.2217  | 12.7073 |
| H82  | 23.5599 | 10.5987 | 18.1898 |
| H83  | 28.5085 | 11.1960 | 8.7892  |
| H84  | 29.2453 | 1.6052  | 15.7182 |
| H85  | 21.6854 | 8.8383  | 19.1535 |
| H86  | 21.9600 | 8.0971  | 17.5854 |
| H87  | 26.0485 | 9.6059  | 8.2617  |
| H88  | 27.2786 | 10.1451 | 7.1334  |
| P89  | 22.2773 | 7.1823  | 11.5538 |
| C90  | 22.6709 | 8.7131  | 10.5690 |
| C91  | 21.2962 | 7.8448  | 12.9853 |
| C92  | 20.9743 | 6.3604  | 10.5287 |
| C93  | 19.6025 | 6.5004  | 10.7893 |
| C94  | 18.6589 | 5.8340  | 10.0062 |
| C95  | 19.0414 | 5.0342  | 8.9188  |
| C96  | 20.4113 | 4.9305  | 8.6405  |
| C97  | 21.3618 | 5.5597  | 9.4438  |
| C98  | 21.1385 | 7.0064  | 14.0997 |
| C99  | 20.5875 | 7.4762  | 15.2916 |
| C100 | 20.2000 | 8.8178  | 15.4307 |
| C101 | 20.2765 | 9.6320  | 14.2893 |
| C102 | 20.8007 | 9.1564  | 13.0841 |
| C103 | 23.3152 | 9.7895  | 11.1995 |
| C104 | 23.8583 | 10.8377 | 10.4627 |
| C105 | 23.7954 | 10.8628 | 9.0635  |
| C106 | 23.1062 | 9.8163  | 8.4352  |
| C107 | 22.5489 | 8.7636  | 9.1711  |
| C108 | 19.8208 | 9.4030  | 16.7719 |
| C109 | 18.0083 | 4.2513  | 8.1446  |
| C110 | 24.4951 | 11.9669 | 8.2997  |

|                                              |         |         |         |
|----------------------------------------------|---------|---------|---------|
| C111                                         | 21.0271 | 10.0574 | 17.4944 |
| C112                                         | 25.6253 | 11.4984 | 7.3537  |
| C113                                         | 17.7275 | 2.8641  | 8.7691  |
| H114                                         | 19.2678 | 7.1269  | 11.6160 |
| H115                                         | 17.5981 | 5.9443  | 10.2437 |
| H116                                         | 20.7484 | 4.3286  | 7.7951  |
| H117                                         | 22.4204 | 5.4111  | 9.2352  |
| H118                                         | 21.5002 | 5.9801  | 14.0574 |
| H119                                         | 20.5009 | 6.7937  | 16.1388 |
| H120                                         | 19.9361 | 10.6690 | 14.3444 |
| H121                                         | 20.8542 | 9.8264  | 12.2263 |
| H122                                         | 23.4254 | 9.8130  | 12.2809 |
| H123                                         | 24.3673 | 11.6475 | 10.9881 |
| H124                                         | 23.0088 | 9.8046  | 7.3475  |
| H125                                         | 22.0366 | 7.9602  | 8.6427  |
| H126                                         | 19.3870 | 8.6238  | 17.4182 |
| H127                                         | 24.8964 | 12.6852 | 9.0301  |
| H128                                         | 20.6492 | 10.7356 | 18.2755 |
| H129                                         | 21.5471 | 10.7046 | 16.7715 |
| H130                                         | 26.1529 | 12.3915 | 6.9787  |
| H131                                         | 25.1695 | 11.0263 | 6.4689  |
| H132                                         | 23.9802 | 9.1389  | 19.0744 |
| H133                                         | 27.0993 | 11.9263 | 9.5365  |
| H134                                         | 19.0402 | 10.1664 | 16.6300 |
| H135                                         | 23.7642 | 12.5318 | 7.6982  |
| H136                                         | 28.8253 | -0.3097 | 14.0097 |
| H137                                         | 30.6078 | 2.6644  | 16.0272 |
| H138                                         | 18.3385 | 0.7132  | 10.3088 |
| H139                                         | 19.5914 | -0.0418 | 9.3257  |
| H140                                         | 18.3909 | 1.1042  | 7.6892  |
| H141                                         | 19.6870 | 2.2373  | 8.0336  |
| H142                                         | 31.2285 | 0.7329  | 14.6811 |
| H143                                         | 31.6053 | 2.2394  | 13.8693 |
| H144                                         | 18.3277 | 4.1269  | 7.0979  |
| H145                                         | 17.0688 | 4.8247  | 8.1197  |
| H146                                         | 16.7430 | 2.5143  | 8.4225  |
| H147                                         | 17.6285 | 3.0006  | 9.8564  |
| H148                                         | 24.7833 | 7.2522  | 11.0851 |
| C149                                         | 24.8003 | 5.2245  | 10.1337 |
| O150                                         | 25.1358 | 4.9626  | 9.0405  |
| C149                                         | 18.0718 | 4.8282  | 13.9069 |
| O150                                         | 17.0356 | 5.3130  | 13.8989 |
| <b>HRh(CO)(P-frame)<sub>3</sub>-1(b)(TS)</b> |         |         |         |
| ATOM                                         | X       | Y       | Z       |

|      |         |         |         |
|------|---------|---------|---------|
| C149 | 20.6535 | 4.9297  | 14.6161 |
| O150 | 19.9430 | 4.0903  | 14.2989 |
| P1   | 24.1800 | 2.7457  | 13.2796 |
| C2   | 23.5418 | 2.2825  | 14.9389 |
| C3   | 25.8719 | 2.0140  | 13.2097 |
| C4   | 23.1278 | 1.7399  | 12.1429 |
| C5   | 23.6211 | 1.2529  | 10.9262 |
| C6   | 22.7421 | 0.8782  | 9.9061  |
| C7   | 21.3509 | 0.9679  | 10.0640 |
| C8   | 20.8686 | 1.3496  | 11.3256 |
| C9   | 21.7368 | 1.7411  | 12.3423 |
| C10  | 26.7539 | 2.5534  | 12.2584 |
| C11  | 28.0954 | 2.1839  | 12.2371 |
| C12  | 28.6229 | 1.2925  | 13.1838 |
| C13  | 27.7324 | 0.7290  | 14.1061 |
| C14  | 26.3789 | 1.0782  | 14.1211 |
| C15  | 23.3889 | 3.2746  | 15.9186 |
| C16  | 22.9305 | 2.9508  | 17.1949 |
| C17  | 22.5920 | 1.6285  | 17.5383 |
| C18  | 22.7313 | 0.6395  | 16.5423 |
| C19  | 23.1905 | 0.9589  | 15.2709 |
| C20  | 30.1037 | 0.9693  | 13.1920 |
| C21  | 20.4253 | 0.7570  | 8.8896  |
| C22  | 22.1048 | 1.3377  | 18.8892 |
| C23  | 31.0437 | 2.1986  | 13.1711 |
| C24  | 21.6483 | 0.1612  | 19.3611 |
| H25  | 24.6968 | 1.2088  | 10.7514 |
| H26  | 23.1492 | 0.5433  | 8.9499  |
| H27  | 19.7937 | 1.3765  | 11.5089 |
| H28  | 21.3227 | 2.0877  | 13.2879 |
| H29  | 26.3860 | 3.3069  | 11.5585 |
| H30  | 28.7510 | 2.6306  | 11.4881 |
| H31  | 28.1057 | 0.0200  | 14.8486 |
| H32  | 25.7298 | 0.6478  | 14.8832 |
| H33  | 23.6157 | 4.3133  | 15.6718 |
| H34  | 22.8224 | 3.7403  | 17.9411 |
| H35  | 22.4759 | -0.3956 | 16.7681 |
| H36  | 23.2633 | 0.1758  | 14.5147 |
| H37  | 30.3190 | 0.3606  | 12.2987 |
| C38  | 19.9235 | 2.0820  | 8.2505  |
| H39  | 22.1189 | 2.1913  | 19.5727 |
| H40  | 30.5598 | 3.0069  | 12.6045 |
| H41  | 31.9502 | 1.9398  | 12.6024 |
| H42  | 21.5839 | -0.7373 | 18.7461 |

|      |         |         |         |
|------|---------|---------|---------|
| H43  | 21.3102 | 0.0730  | 20.3931 |
| Rh44 | 23.9874 | 5.0285  | 12.5988 |
| P45  | 25.6175 | 6.3766  | 13.6169 |
| C46  | 27.1233 | 5.6190  | 14.3520 |
| C47  | 24.8982 | 7.4758  | 14.9141 |
| C48  | 26.2757 | 7.5620  | 12.3622 |
| C49  | 26.6089 | 8.8896  | 12.6620 |
| C50  | 26.8914 | 9.7959  | 11.6351 |
| C51  | 26.8676 | 9.4104  | 10.2868 |
| C52  | 26.6201 | 8.0576  | 10.0054 |
| C53  | 26.3152 | 7.1542  | 11.0210 |
| C54  | 25.3286 | 7.5263  | 16.2471 |
| C55  | 24.6184 | 8.2751  | 17.1940 |
| C56  | 23.4788 | 9.0134  | 16.8444 |
| C57  | 23.0844 | 8.9911  | 15.4972 |
| C58  | 23.7636 | 8.2240  | 14.5564 |
| C59  | 26.9688 | 4.6183  | 15.3251 |
| C60  | 28.0551 | 3.8519  | 15.7314 |
| C61  | 29.3299 | 4.0284  | 15.1728 |
| C62  | 29.4930 | 5.0631  | 14.2429 |
| C63  | 28.4081 | 5.8474  | 13.8381 |
| C64  | 22.6896 | 9.7800  | 17.8907 |
| C65  | 27.0094 | 10.4358 | 9.1776  |
| C66  | 30.4428 | 3.0875  | 15.5812 |
| C67  | 21.1556 | 9.7867  | 17.6741 |
| C68  | 31.5136 | 2.7449  | 14.5308 |
| C69  | 26.0838 | 10.1712 | 7.9669  |
| H70  | 26.5914 | 9.2391  | 13.6951 |
| H71  | 27.0945 | 10.8390 | 11.8882 |
| H72  | 26.6043 | 7.7091  | 8.9721  |
| H73  | 26.0319 | 6.1296  | 10.7721 |
| H74  | 26.2119 | 6.9666  | 16.5574 |
| H75  | 24.9596 | 8.2739  | 18.2318 |
| H76  | 22.2034 | 9.5456  | 15.1742 |
| H77  | 23.3879 | 8.1799  | 13.5330 |
| H78  | 25.9823 | 4.3960  | 15.7331 |
| H79  | 27.8999 | 3.0549  | 16.4608 |
| H80  | 30.4716 | 5.2498  | 13.7977 |
| H81  | 28.5581 | 6.6225  | 13.0859 |
| H82  | 23.0553 | 10.8212 | 17.9292 |
| H83  | 28.0572 | 10.4753 | 8.8342  |
| H84  | 29.9783 | 2.1567  | 15.9419 |
| H85  | 20.6485 | 9.6137  | 18.6362 |
| H86  | 20.8927 | 8.9283  | 17.0392 |

|      |         |         |         |
|------|---------|---------|---------|
| H87  | 25.2156 | 9.5885  | 8.3078  |
| H88  | 26.6079 | 9.5332  | 7.2388  |
| P89  | 21.1857 | 8.3315  | 11.2271 |
| C90  | 21.9058 | 9.7078  | 10.2526 |
| C91  | 20.1827 | 9.1340  | 12.5392 |
| C92  | 20.0839 | 7.3522  | 10.1407 |
| C93  | 18.7983 | 6.9428  | 10.5322 |
| C94  | 18.1619 | 5.8826  | 9.8830  |
| C95  | 18.7696 | 5.2028  | 8.8170  |
| C96  | 20.0113 | 5.6778  | 8.3703  |
| C97  | 20.6683 | 6.7123  | 9.0303  |
| C98  | 19.7817 | 8.3327  | 13.6246 |
| C99  | 19.3482 | 8.9006  | 14.8215 |
| C100 | 19.3597 | 10.2922 | 15.0055 |
| C101 | 19.6782 | 11.0900 | 13.8958 |
| C102 | 20.0689 | 10.5285 | 12.6788 |
| C103 | 22.9551 | 10.3947 | 10.8891 |
| C104 | 23.7430 | 11.3009 | 10.1905 |
| C105 | 23.5593 | 11.5187 | 8.8171  |
| C106 | 22.4824 | 10.8718 | 8.1929  |
| C107 | 21.6555 | 9.9912  | 8.9005  |
| C108 | 19.2125 | 10.9153 | 16.3739 |
| C109 | 18.1331 | 3.9650  | 8.2290  |
| C110 | 24.5867 | 12.3095 | 8.0425  |
| C111 | 20.5938 | 11.0817 | 17.0598 |
| C112 | 25.5582 | 11.4112 | 7.2288  |
| C113 | 18.6305 | 2.6378  | 8.8608  |
| H114 | 18.3031 | 7.4353  | 11.3697 |
| H115 | 17.1749 | 5.5645  | 10.2259 |
| H116 | 20.5008 | 5.1956  | 7.5231  |
| H117 | 21.6712 | 6.9926  | 8.7068  |
| H118 | 19.8796 | 7.2484  | 13.5596 |
| H119 | 19.0695 | 8.2465  | 15.6493 |
| H120 | 19.6546 | 12.1776 | 13.9969 |
| H121 | 20.3399 | 11.1807 | 11.8487 |
| H122 | 23.1859 | 10.1853 | 11.9347 |
| H123 | 24.5625 | 11.8026 | 10.7071 |
| H124 | 22.2940 | 11.0414 | 7.1300  |
| H125 | 20.8306 | 9.4949  | 8.3881  |
| H126 | 18.5544 | 10.3056 | 17.0118 |
| H127 | 25.1597 | 12.9315 | 8.7464  |
| H128 | 20.5212 | 11.8498 | 17.8466 |
| H129 | 21.3004 | 11.4794 | 16.3141 |
| H130 | 26.3930 | 12.0352 | 6.8686  |

|                                              |         |         |         |
|----------------------------------------------|---------|---------|---------|
| H131                                         | 25.0300 | 11.0579 | 6.3286  |
| H132                                         | 22.9281 | 9.3515  | 18.8752 |
| H133                                         | 26.8035 | 11.4283 | 9.6051  |
| H134                                         | 18.7384 | 11.9035 | 16.2788 |
| H135                                         | 24.0983 | 13.0074 | 7.3442  |
| H136                                         | 30.3362 | 0.3263  | 14.0551 |
| H137                                         | 30.9616 | 3.5118  | 16.4584 |
| H138                                         | 19.5558 | 0.1479  | 9.1875  |
| H139                                         | 20.9610 | 0.1785  | 8.1228  |
| H140                                         | 19.7426 | 1.9024  | 7.1776  |
| H141                                         | 20.7260 | 2.8321  | 8.3124  |
| H142                                         | 32.1956 | 2.0111  | 14.9919 |
| H143                                         | 32.1338 | 3.6350  | 14.3366 |
| H144                                         | 18.3022 | 3.9310  | 7.1403  |
| H145                                         | 17.0438 | 4.0310  | 8.3701  |
| H146                                         | 17.8400 | 1.8774  | 8.7441  |
| H147                                         | 18.7560 | 2.7908  | 9.9438  |
| H148                                         | 23.6567 | 6.5179  | 12.1111 |
| C149                                         | 23.1209 | 4.6364  | 10.9884 |
| O150                                         | 22.7773 | 4.4849  | 9.8840  |
| <b>HRh(CO)(P-frame)<sub>3</sub>-1(b)(FS)</b> |         |         |         |
| ATOM                                         | X       | Y       | Z       |
| C149                                         | 23.1469 | 6.3226  | 13.7956 |
| O150                                         | 22.3161 | 6.7635  | 14.4814 |
| P1                                           | 24.1356 | 3.4092  | 13.3001 |
| C2                                           | 23.4108 | 3.1843  | 14.9797 |
| C3                                           | 25.5779 | 2.2676  | 13.2364 |
| C4                                           | 22.8471 | 2.6664  | 12.2108 |
| C5                                           | 22.9465 | 1.3926  | 11.6378 |
| C6                                           | 21.9552 | 0.9345  | 10.7622 |
| C7                                           | 20.8382 | 1.7182  | 10.4407 |
| C8                                           | 20.7389 | 2.9854  | 11.0390 |
| C9                                           | 21.7273 | 3.4554  | 11.8979 |
| C10                                          | 26.4891 | 2.4355  | 12.1794 |
| C11                                          | 27.6945 | 1.7442  | 12.1588 |
| C12                                          | 28.0674 | 0.8923  | 13.2126 |
| C13                                          | 27.1302 | 0.6818  | 14.2324 |
| C14                                          | 25.9015 | 1.3534  | 14.2495 |
| C15                                          | 23.7598 | 4.0699  | 16.0122 |
| C16                                          | 23.1580 | 3.9785  | 17.2643 |
| C17                                          | 22.1579 | 3.0245  | 17.5285 |
| C18                                          | 21.8288 | 2.1231  | 16.4957 |
| C19                                          | 22.4411 | 2.2016  | 15.2481 |
| C20                                          | 29.4339 | 0.2350  | 13.2193 |

|      |         |         |         |
|------|---------|---------|---------|
| C21  | 19.7865 | 1.2162  | 9.4696  |
| C22  | 21.4824 | 3.0374  | 18.8295 |
| C23  | 30.6263 | 1.1786  | 12.9050 |
| C24  | 20.3269 | 2.4296  | 19.1495 |
| H25  | 23.8136 | 0.7656  | 11.8496 |
| H26  | 22.0654 | -0.0499 | 10.3025 |
| H27  | 19.8967 | 3.6379  | 10.8055 |
| H28  | 21.6551 | 4.4685  | 12.2942 |
| H29  | 26.2620 | 3.1442  | 11.3826 |
| H30  | 28.3772 | 1.9082  | 11.3242 |
| H31  | 27.3789 | 0.0083  | 15.0558 |
| H32  | 25.2175 | 1.1982  | 15.0845 |
| H33  | 24.4688 | 4.8756  | 15.8204 |
| H34  | 23.4330 | 4.6970  | 18.0387 |
| H35  | 21.0764 | 1.3530  | 16.6688 |
| H36  | 22.1424 | 1.5050  | 14.4647 |
| H37  | 29.4222 | -0.5666 | 12.4628 |
| C38  | 19.2448 | 2.2770  | 8.4765  |
| H39  | 21.9738 | 3.6454  | 19.5947 |
| H40  | 30.2485 | 2.0714  | 12.3859 |
| H41  | 31.2977 | 0.6799  | 12.1895 |
| H42  | 19.7510 | 1.8475  | 18.4289 |
| H43  | 19.9069 | 2.5194  | 20.1509 |
| Rh44 | 24.5240 | 5.6804  | 12.6472 |
| P45  | 26.6105 | 6.5407  | 13.5269 |
| C46  | 27.9629 | 5.4732  | 14.1652 |
| C47  | 26.0815 | 7.6508  | 14.9083 |
| C48  | 27.3718 | 7.6504  | 12.2623 |
| C49  | 27.6311 | 9.0106  | 12.4834 |
| C50  | 27.7327 | 9.8971  | 11.4049 |
| C51  | 27.6149 | 9.4545  | 10.0806 |
| C52  | 27.5433 | 8.0668  | 9.8686  |
| C53  | 27.4060 | 7.1859  | 10.9355 |
| C54  | 26.1312 | 7.2647  | 16.2559 |
| C55  | 25.2986 | 7.8737  | 17.2070 |
| C56  | 24.4181 | 8.9024  | 16.8527 |
| C57  | 24.4796 | 9.3754  | 15.5317 |
| C58  | 25.2743 | 8.7573  | 14.5776 |
| C59  | 27.6226 | 4.4429  | 15.0573 |
| C60  | 28.5572 | 3.4863  | 15.4373 |
| C61  | 29.8544 | 3.4788  | 14.9077 |
| C62  | 30.2059 | 4.5269  | 14.0428 |
| C63  | 29.2812 | 5.5130  | 13.6806 |
| C64  | 23.3492 | 9.4424  | 17.7744 |

|      |         |         |         |
|------|---------|---------|---------|
| C65  | 27.4335 | 10.4301 | 8.9357  |
| C66  | 30.7873 | 2.3414  | 15.2603 |
| C67  | 21.9167 | 9.0680  | 17.2881 |
| C68  | 31.4947 | 1.6314  | 14.0898 |
| C69  | 26.2728 | 10.0310 | 7.9875  |
| H70  | 27.6622 | 9.4016  | 13.5003 |
| H71  | 27.8434 | 10.9656 | 11.6051 |
| H72  | 27.5027 | 7.6728  | 8.8522  |
| H73  | 27.2264 | 6.1300  | 10.7325 |
| H74  | 26.7883 | 6.4527  | 16.5680 |
| H75  | 25.3183 | 7.5114  | 18.2376 |
| H76  | 23.8363 | 10.2033 | 15.2280 |
| H77  | 25.2222 | 9.1008  | 13.5454 |
| H78  | 26.6016 | 4.3567  | 15.4272 |
| H79  | 28.2547 | 2.6914  | 16.1197 |
| H80  | 31.2145 | 4.5716  | 13.6264 |
| H81  | 29.5821 | 6.3032  | 12.9919 |
| H82  | 23.4364 | 10.5408 | 17.8140 |
| H83  | 28.3653 | 10.5264 | 8.3533  |
| H84  | 30.2088 | 1.6021  | 15.8346 |
| H85  | 21.5387 | 8.2118  | 17.8702 |
| H86  | 21.9747 | 8.7121  | 16.2509 |
| H87  | 25.5600 | 9.4031  | 8.5417  |
| H88  | 26.6669 | 9.3933  | 7.1820  |
| P89  | 20.8516 | 7.9345  | 11.1073 |
| C90  | 21.7384 | 9.2944  | 10.2569 |
| C91  | 20.0468 | 8.6863  | 12.5784 |
| C92  | 19.5996 | 7.2333  | 9.9715  |
| C93  | 18.2939 | 6.9001  | 10.3758 |
| C94  | 17.5664 | 5.9253  | 9.6885  |
| C95  | 18.0916 | 5.2717  | 8.5627  |
| C96  | 19.3321 | 5.7158  | 8.0785  |
| C97  | 20.0827 | 6.6583  | 8.7778  |
| C98  | 19.5216 | 7.8071  | 13.5442 |
| C99  | 19.2848 | 8.2322  | 14.8499 |
| C100 | 19.5933 | 9.5376  | 15.2599 |
| C101 | 20.0357 | 10.4359 | 14.2763 |
| C102 | 20.2537 | 10.0251 | 12.9591 |
| C103 | 22.9401 | 9.6763  | 10.8824 |
| C104 | 23.8109 | 10.5797 | 10.2838 |
| C105 | 23.5458 | 11.1093 | 9.0108  |
| C106 | 22.3395 | 10.7415 | 8.3936  |
| C107 | 21.4421 | 9.8569  | 9.0040  |
| C108 | 19.5363 | 9.9289  | 16.7223 |

|                                              |         |         |         |
|----------------------------------------------|---------|---------|---------|
| C109                                         | 17.4105 | 4.0471  | 8.0019  |
| C110                                         | 24.5716 | 11.9763 | 8.3193  |
| C111                                         | 20.9177 | 10.2279 | 17.3516 |
| C112                                         | 25.5007 | 11.1980 | 7.3541  |
| C113                                         | 17.8187 | 2.7653  | 8.7717  |
| H114                                         | 17.8617 | 7.3675  | 11.2613 |
| H115                                         | 16.5753 | 5.6429  | 10.0524 |
| H116                                         | 19.7492 | 5.2717  | 7.1729  |
| H117                                         | 21.0870 | 6.9034  | 8.4278  |
| H118                                         | 19.3690 | 6.7555  | 13.2973 |
| H119                                         | 18.9230 | 7.5110  | 15.5848 |
| H120                                         | 20.2492 | 11.4723 | 14.5469 |
| H121                                         | 20.6335 | 10.7418 | 12.2306 |
| H122                                         | 23.2073 | 9.2272  | 11.8400 |
| H123                                         | 24.7381 | 10.8429 | 10.7964 |
| H124                                         | 22.0926 | 11.1510 | 7.4108  |
| H125                                         | 20.5129 | 9.5962  | 8.4947  |
| H126                                         | 19.0466 | 9.1198  | 17.2863 |
| H127                                         | 25.1778 | 12.4880 | 9.0829  |
| H128                                         | 20.7637 | 10.5410 | 18.3977 |
| H129                                         | 21.3599 | 11.0972 | 16.8366 |
| H130                                         | 26.2018 | 11.9132 | 6.8923  |
| H131                                         | 24.8838 | 10.7957 | 6.5349  |
| H132                                         | 23.5175 | 9.0857  | 18.8012 |
| H133                                         | 27.2473 | 11.4267 | 9.3642  |
| H134                                         | 18.9047 | 10.8232 | 16.8465 |
| H135                                         | 24.0668 | 12.7695 | 7.7463  |
| H136                                         | 29.5904 | -0.2750 | 14.1823 |
| H137                                         | 31.5667 | 2.7037  | 15.9520 |
| H138                                         | 18.9432 | 0.7956  | 10.0456 |
| H139                                         | 20.2143 | 0.3665  | 8.9185  |
| H140                                         | 19.2644 | 1.8653  | 7.4553  |
| H141                                         | 19.9343 | 3.1334  | 8.4668  |
| H142                                         | 32.0259 | 0.7608  | 14.5092 |
| H143                                         | 32.2806 | 2.2907  | 13.6867 |
| H144                                         | 17.6496 | 3.9255  | 6.9334  |
| H145                                         | 16.3186 | 4.1666  | 8.0712  |
| H146                                         | 17.1059 | 1.9597  | 8.5297  |
| H147                                         | 17.7035 | 2.9606  | 9.8507  |
| H148                                         | 24.5356 | 7.1908  | 12.1212 |
| C149                                         | 24.5691 | 5.3323  | 10.7640 |
| O150                                         | 24.5386 | 5.2470  | 9.6003  |
| <b>HRh(CO)(P-frame)<sub>3</sub>-2(b)(IS)</b> |         |         |         |
| ATOM                                         | X       | Y       | Z       |

|     |         |        |         |
|-----|---------|--------|---------|
| C1  | 24.4343 | 9.5299 | 21.0476 |
| O2  | 25.0996 | 9.9455 | 21.9200 |
| P3  | 23.0529 | 6.3209 | 19.7742 |
| C4  | 24.4357 | 5.2366 | 19.1785 |
| C5  | 21.5599 | 5.5134 | 19.0315 |
| C6  | 22.8843 | 5.7442 | 21.5352 |
| C7  | 22.1320 | 4.6132 | 21.8878 |
| C8  | 22.0491 | 4.2010 | 23.2172 |
| C9  | 22.7103 | 4.8928 | 24.2480 |
| C10 | 23.4690 | 6.0218 | 23.8850 |
| C11 | 23.5446 | 6.4409 | 22.5611 |
| C12 | 20.3214 | 6.1544 | 19.1916 |
| C13 | 19.1478 | 5.5875 | 18.7014 |
| C14 | 19.1582 | 4.3601 | 18.0102 |
| C15 | 20.4040 | 3.7242 | 17.8473 |
| C16 | 21.5758 | 4.2796 | 18.3528 |
| C17 | 24.6444 | 5.0587 | 17.8014 |
| C18 | 25.7443 | 4.3477 | 17.3258 |
| C19 | 26.7127 | 3.8249 | 18.1946 |
| C20 | 26.5007 | 4.0050 | 19.5681 |
| C21 | 25.3807 | 4.6858 | 20.0559 |
| C22 | 17.8997 | 3.8064 | 17.5026 |
| C23 | 22.5757 | 4.4278 | 25.6330 |
| C24 | 27.9105 | 3.0413 | 17.6818 |
| C25 | 17.7263 | 2.6587 | 16.8236 |
| C26 | 23.0666 | 5.0147 | 26.7385 |
| H27 | 21.6013 | 4.0487 | 21.1219 |
| H28 | 21.4518 | 3.3212 | 23.4651 |
| H29 | 24.0039 | 6.5885 | 24.6471 |
| H30 | 24.1178 | 7.3338 | 22.3126 |
| H31 | 20.2733 | 7.1076 | 19.7182 |
| H32 | 18.1993 | 6.1055 | 18.8534 |
| H33 | 20.4620 | 2.7654 | 17.3315 |
| H34 | 22.5127 | 3.7393 | 18.2263 |
| H35 | 23.9432 | 5.4777 | 17.0801 |
| H36 | 25.8491 | 4.2252 | 16.2478 |
| H37 | 27.2287 | 3.6098 | 20.2803 |
| H38 | 25.2565 | 4.7973 | 21.1331 |
| H39 | 17.0151 | 4.4126 | 17.7179 |
| H40 | 21.9997 | 3.5059 | 25.7535 |
| H41 | 18.5532 | 1.9945 | 16.5694 |
| H42 | 16.7337 | 2.3463 | 16.5011 |
| H43 | 23.6389 | 5.9427 | 26.7066 |
| H44 | 22.9039 | 4.5744 | 27.7215 |

Rh45 23.6828 8.6241 19.5717

P46 21.7131 10.0694 19.3987

C47 20.4717 9.9053 20.7573

C48 20.6669 10.0119 17.8765

C49 22.1450 11.8689 19.5906

C50 21.9304 12.8727 18.6400

C51 22.5024 14.1407 18.7982

C52 23.2916 14.4532 19.9064

C53 23.3943 13.4828 20.9176

C54 22.8380 12.2204 20.7628

C55 19.4143 9.3790 17.8364

C56 18.7217 9.2408 16.6309

C57 19.2274 9.7466 15.4252

C58 20.4593 10.4145 15.4770

C59 21.1754 10.5138 16.6677

C60 20.6522 8.9550 21.7678

C61 19.7450 8.8611 22.8238

C62 18.6264 9.7086 22.9053

C63 18.4599 10.6729 21.8887

C64 19.3651 10.7733 20.8416

C65 18.5068 9.4908 14.1218

C66 24.0778 15.7396 20.0169

C67 17.7061 9.5716 24.0391

C68 19.0891 8.2856 13.3379

C69 16.5586 10.2422 24.2427

C70 25.6141 15.5076 20.0665

H71 21.3404 12.6763 17.7476

H72 22.3606 14.8859 18.0119

H73 23.9534 13.7029 21.8291

H74 22.9582 11.4919 21.5622

H75 18.9708 8.9863 18.7502

H76 17.7596 8.7241 16.6308

H77 20.8884 10.8400 14.5692

H78 22.1546 10.9843 16.6518

H79 21.5215 8.2966 21.7316

H80 19.9086 8.1166 23.6051

H81 17.6211 11.3675 21.9300

H82 19.2243 11.5448 20.0831

H83 18.5317 10.3893 13.4844

H84 23.7748 16.2594 20.9399

H85 18.0123 8.8330 24.7852

H86 18.2823 7.8302 12.7438

H87 19.3862 7.5227 14.0711

H88 16.1822 10.9876 23.5410

H89 15.9571 10.0598 25.1325

H90 25.7952 14.4758 20.4000

H91 26.0486 16.1546 20.8438

P92 24.7752 9.0379 17.4923

C93 25.2637 10.8178 17.2857

C94 23.9128 8.5963 15.9142

C95 26.4042 8.1530 17.3388

C96 26.8922 7.6322 16.1317

C97 28.0364 6.8298 16.1039

C98 28.7303 6.5101 17.2780

C99 28.2872 7.1039 18.4674

C100 27.1531 7.9067 18.5002

C101 22.8255 7.7179 16.0210

C102 22.0836 7.3363 14.9050

C103 22.3627 7.8670 13.6385

C104 23.4706 8.7242 13.5234

C105 24.2445 9.0715 14.6316

C106 24.6378 11.7077 16.3994

C107 24.8812 13.0790 16.4670

C108 25.7654 13.6267 17.4037

C109 26.4482 12.7297 18.2383

C110 26.1914 11.3587 18.1915

C111 21.4595 7.6192 12.4553

C112 29.8817 5.5318 17.3362

C113 25.9230 15.1320 17.4651

C114 20.2739 8.6149 12.3999

C115 26.4057 15.7772 18.7743

H116 26.3501 7.8010 15.2028

H117 28.3628 6.4161 15.1480

H118 28.8151 6.8920 19.3992

H119 26.8119 8.2955 19.4581

H120 22.5322 7.3648 17.0112

H121 21.2504 6.6448 15.0363

H122 23.7327 9.1296 12.5429

H123 25.1027 9.7297 14.4937

H124 23.9305 11.3416 15.6580

H125 24.3383 13.7439 15.7910

H126 27.1710 13.0998 18.9663

H127 26.7078 10.7066 18.8958

H128 21.0738 6.5882 12.4728

H129 24.9557 15.5767 17.1809

H130 19.9060 8.6617 11.3634

H131 20.6673 9.6183 12.6229

H132 26.4291 16.8654 18.5980



|      |         |         |         |
|------|---------|---------|---------|
| H133 | 27.4544 | 15.4924 | 18.9598 |
| H134 | 17.4472 | 9.2941  | 14.3406 |
| H135 | 23.8141 | 16.4155 | 19.1892 |
| H136 | 22.0465 | 7.7210  | 11.5301 |
| H137 | 26.6239 | 15.4457 | 16.6719 |
| C138 | 28.5223 | 3.5018  | 16.3366 |
| H139 | 27.5873 | 1.9922  | 17.5729 |
| H140 | 28.6841 | 3.0219  | 18.4650 |
| H141 | 27.7745 | 4.0771  | 15.7754 |
| H142 | 28.7297 | 2.6147  | 15.7195 |
| C143 | 29.8292 | 4.3132  | 16.3976 |
| H144 | 29.9565 | 5.1804  | 18.3768 |
| H145 | 30.8276 | 6.0658  | 17.1416 |
| H146 | 30.6529 | 3.6435  | 16.6951 |
| H147 | 30.0708 | 4.6286  | 15.3695 |
| H148 | 24.9731 | 7.7493  | 19.8141 |

|    |         |        |         |
|----|---------|--------|---------|
| C1 | 18.0481 | 5.1615 | 23.1079 |
| O2 | 18.4050 | 5.4697 | 24.1496 |

**HRh(CO)(P-frame)<sub>3</sub>-2(b)(TS)**

| ATOM | X | Y | Z |
|------|---|---|---|
|------|---|---|---|

|     |         |        |         |
|-----|---------|--------|---------|
| C1  | 19.4874 | 6.0641 | 16.6229 |
| O2  | 18.5497 | 6.1982 | 17.2618 |
| C1  | 24.2697 | 9.0459 | 20.9441 |
| O2  | 24.8439 | 9.1922 | 21.9567 |
| P3  | 22.3470 | 5.1299 | 20.1792 |
| C4  | 23.9101 | 4.4215 | 19.5193 |
| C5  | 21.0721 | 3.8544 | 19.8161 |
| C6  | 22.5313 | 4.9983 | 22.0072 |
| C7  | 21.9827 | 3.9738 | 22.7943 |
| C8  | 22.0917 | 4.0158 | 24.1842 |
| C9  | 22.7497 | 5.0707 | 24.8429 |
| C10 | 23.3146 | 6.0850 | 24.0439 |
| C11 | 23.1967 | 6.0533 | 22.6607 |
| C12 | 19.7375 | 4.1995 | 20.0956 |
| C13 | 18.6988 | 3.3137 | 19.8299 |
| C14 | 18.9395 | 2.0568 | 19.2416 |
| C15 | 20.2759 | 1.7230 | 18.9504 |
| C16 | 21.3202 | 2.5986 | 19.2343 |
| C17 | 24.0711 | 4.3804 | 18.1251 |
| C18 | 25.2887 | 4.0131 | 17.5517 |
| C19 | 26.4074 | 3.7206 | 18.3438 |
| C20 | 26.2327 | 3.7383 | 19.7364 |
| C21 | 25.0101 | 4.0727 | 20.3183 |
| C22 | 17.8051 | 1.1730 | 18.9568 |

|      |         |         |         |
|------|---------|---------|---------|
| C23  | 22.8022 | 5.0843  | 26.3085 |
| C24  | 27.7907 | 3.4555  | 17.7718 |
| C25  | 17.8248 | 0.0017  | 18.2971 |
| C26  | 23.3025 | 6.0531  | 27.0946 |
| H27  | 21.4637 | 3.1411  | 22.3194 |
| H28  | 21.6524 | 3.2118  | 24.7783 |
| H29  | 23.8362 | 6.9225  | 24.5067 |
| H30  | 23.6205 | 6.8651  | 22.0713 |
| H31  | 19.5104 | 5.1772  | 20.5260 |
| H32  | 17.6732 | 3.6021  | 20.0668 |
| H33  | 20.5084 | 0.7552  | 18.5051 |
| H34  | 22.3447 | 2.3058  | 19.0039 |
| H35  | 23.2418 | 4.6589  | 17.4721 |
| H36  | 25.3676 | 3.9987  | 16.4655 |
| H37  | 27.0823 | 3.5064  | 20.3828 |
| H38  | 24.9182 | 4.0925  | 21.4043 |
| H39  | 16.8414 | 1.5378  | 19.3237 |
| H40  | 22.3644 | 4.2054  | 26.7902 |
| H41  | 18.7396 | -0.4244 | 17.8834 |
| H42  | 16.9092 | -0.5683 | 18.1442 |
| H43  | 23.7417 | 6.9665  | 26.6922 |
| H44  | 23.2806 | 5.9572  | 28.1796 |
| Rh45 | 23.7413 | 8.9578  | 19.1611 |
| P46  | 21.9057 | 10.5471 | 19.2367 |
| C47  | 20.7015 | 10.0950 | 20.5555 |
| C48  | 20.8013 | 10.7002 | 17.7629 |
| C49  | 22.4348 | 12.2535 | 19.6996 |
| C50  | 22.1082 | 13.4385 | 19.0278 |
| C51  | 22.7887 | 14.6287 | 19.3149 |
| C52  | 23.7932 | 14.6788 | 20.2869 |
| C53  | 24.0149 | 13.5180 | 21.0469 |
| C54  | 23.3649 | 12.3291 | 20.7518 |
| C55  | 19.6342 | 9.9216  | 17.6809 |
| C56  | 18.8648 | 9.9076  | 16.5174 |
| C57  | 19.2136 | 10.6730 | 15.3959 |
| C58  | 20.3652 | 11.4670 | 15.4903 |
| C59  | 21.1546 | 11.4657 | 16.6402 |
| C60  | 20.6896 | 8.7825  | 21.0450 |
| C61  | 19.7771 | 8.4027  | 22.0294 |
| C62  | 18.8528 | 9.3186  | 22.5614 |
| C63  | 18.8749 | 10.6378 | 22.0611 |
| C64  | 19.7791 | 11.0189 | 21.0772 |
| C65  | 18.4058 | 10.5778 | 14.1225 |
| C66  | 24.6706 | 15.8903 | 20.5151 |

|      |         |         |         |
|------|---------|---------|---------|
| C67  | 17.9271 | 8.8743  | 23.6094 |
| C68  | 18.9236 | 9.4758  | 13.1664 |
| C69  | 17.0097 | 9.6131  | 24.2565 |
| C70  | 26.1828 | 15.5898 | 20.3549 |
| H71  | 21.3446 | 13.4405 | 18.2518 |
| H72  | 22.5536 | 15.5272 | 18.7396 |
| H73  | 24.7502 | 13.5277 | 21.8530 |
| H74  | 23.6079 | 11.4380 | 21.3265 |
| H75  | 19.3193 | 9.3195  | 18.5328 |
| H76  | 17.9677 | 9.2852  | 16.4825 |
| H77  | 20.6587 | 12.0970 | 14.6490 |
| H78  | 22.0577 | 12.0704 | 16.6612 |
| H79  | 21.4088 | 8.0558  | 20.6595 |
| H80  | 19.7936 | 7.3780  | 22.4065 |
| H81  | 18.1718 | 11.3763 | 22.4463 |
| H82  | 19.7763 | 12.0473 | 20.7136 |
| H83  | 18.3980 | 11.5473 | 13.5996 |
| H84  | 24.4994 | 16.2538 | 21.5416 |
| H85  | 18.0212 | 7.8188  | 23.8801 |
| H86  | 18.1009 | 9.1611  | 12.5059 |
| H87  | 19.1732 | 8.5946  | 13.7758 |
| H88  | 16.8550 | 10.6736 | 24.0533 |
| H89  | 16.3784 | 9.1680  | 25.0250 |
| H90  | 26.3604 | 14.5467 | 20.6523 |
| H91  | 26.7474 | 16.2030 | 21.0738 |
| P92  | 24.7855 | 9.2958  | 17.1120 |
| C93  | 25.3346 | 11.0639 | 17.1039 |
| C94  | 23.8769 | 9.0575  | 15.5269 |
| C95  | 26.3528 | 8.3321  | 16.8701 |
| C96  | 26.8050 | 7.8940  | 15.6157 |
| C97  | 27.9314 | 7.0743  | 15.5085 |
| C98  | 28.6467 | 6.6597  | 16.6421 |
| C99  | 28.2196 | 7.1452  | 17.8844 |
| C100 | 27.0950 | 7.9612  | 17.9990 |
| C101 | 22.7462 | 8.2283  | 15.5696 |
| C102 | 21.9282 | 8.0637  | 14.4513 |
| C103 | 22.1837 | 8.7640  | 13.2643 |
| C104 | 23.3415 | 9.5559  | 13.2081 |
| C105 | 24.1872 | 9.6886  | 14.3093 |
| C106 | 24.6643 | 12.0597 | 16.3759 |
| C107 | 24.9326 | 13.4077 | 16.5923 |
| C108 | 25.8814 | 13.8337 | 17.5332 |
| C109 | 26.5905 | 12.8374 | 18.2175 |
| C110 | 26.3199 | 11.4816 | 18.0143 |

|                                              |         |         |         |
|----------------------------------------------|---------|---------|---------|
| C111                                         | 21.2046 | 8.7804  | 12.1157 |
| C112                                         | 29.7697 | 5.6506  | 16.5562 |
| C113                                         | 26.0817 | 15.3235 | 17.7223 |
| C114                                         | 20.1321 | 9.8842  | 12.2986 |
| C115                                         | 26.8045 | 15.8474 | 18.9697 |
| H116                                         | 26.2527 | 8.1492  | 14.7118 |
| H117                                         | 28.2354 | 6.7255  | 14.5192 |
| H118                                         | 28.7517 | 6.8464  | 18.7902 |
| H119                                         | 26.7521 | 8.2621  | 18.9887 |
| H120                                         | 22.4934 | 7.7209  | 16.5033 |
| H121                                         | 21.0634 | 7.4036  | 14.5261 |
| H122                                         | 23.5761 | 10.0929 | 12.2860 |
| H123                                         | 25.0773 | 10.3130 | 14.2238 |
| H124                                         | 23.9103 | 11.7803 | 15.6435 |
| H125                                         | 24.3722 | 14.1555 | 16.0264 |
| H126                                         | 27.3538 | 13.1147 | 18.9457 |
| H127                                         | 26.8681 | 10.7428 | 18.5986 |
| H128                                         | 20.7140 | 7.8012  | 12.0061 |
| H129                                         | 25.0906 | 15.8001 | 17.6549 |
| H130                                         | 19.7723 | 10.2029 | 11.3083 |
| H131                                         | 20.6304 | 10.7615 | 12.7361 |
| H132                                         | 26.9007 | 16.9374 | 18.8353 |
| H133                                         | 27.8389 | 15.4673 | 18.9852 |
| H134                                         | 17.3605 | 10.3554 | 14.3829 |
| H135                                         | 24.3651 | 16.7111 | 19.8479 |
| H136                                         | 21.7548 | 8.9645  | 11.1813 |
| H137                                         | 26.6356 | 15.7026 | 16.8452 |
| C138                                         | 27.9851 | 3.7734  | 16.2806 |
| H139                                         | 28.0652 | 2.4044  | 17.9651 |
| H140                                         | 28.4975 | 4.0491  | 18.3717 |
| H141                                         | 27.2553 | 4.5333  | 15.9726 |
| H142                                         | 27.7657 | 2.8803  | 15.6757 |
| C143                                         | 29.3757 | 4.3014  | 15.8992 |
| H144                                         | 30.1485 | 5.4721  | 17.5737 |
| H145                                         | 30.6177 | 6.0740  | 15.9935 |
| H146                                         | 30.1538 | 3.5602  | 16.1451 |
| H147                                         | 29.4030 | 4.4136  | 14.8041 |
| H148                                         | 24.7197 | 7.7063  | 19.1810 |
| <b>HRh(CO)(P-frame)<sub>3</sub>-2(b)(FS)</b> |         |         |         |
| ATOM                                         | X       | Y       | Z       |
| C1                                           | 21.8139 | 7.7352  | 18.0484 |
| O2                                           | 20.9698 | 7.0562  | 17.6170 |
| C1                                           | 24.0822 | 9.0080  | 20.4261 |
| O2                                           | 24.6629 | 8.9945  | 21.4414 |

|      |         |         |         |
|------|---------|---------|---------|
| P3   | 22.1127 | 4.4137  | 20.0617 |
| C4   | 23.7413 | 3.6933  | 19.5912 |
| C5   | 20.9315 | 3.0131  | 19.9398 |
| C6   | 22.2428 | 4.7326  | 21.8666 |
| C7   | 21.5684 | 4.0082  | 22.8605 |
| C8   | 21.6177 | 4.4182  | 24.1934 |
| C9   | 22.3515 | 5.5501  | 24.5914 |
| C10  | 23.0227 | 6.2760  | 23.5871 |
| C11  | 22.9582 | 5.8842  | 22.2564 |
| C12  | 19.6112 | 3.3495  | 19.5992 |
| C13  | 18.6368 | 2.3659  | 19.4573 |
| C14  | 18.9444 | 1.0040  | 19.6321 |
| C15  | 20.2734 | 0.6714  | 19.9666 |
| C16  | 21.2462 | 1.6531  | 20.1213 |
| C17  | 23.8683 | 3.1684  | 18.2903 |
| C18  | 25.1187 | 2.8837  | 17.7473 |
| C19  | 26.2993 | 3.1396  | 18.4651 |
| C20  | 26.1662 | 3.6052  | 19.7785 |
| C21  | 24.9137 | 3.8688  | 20.3415 |
| C22  | 17.8841 | 0.0085  | 19.4505 |
| C23  | 22.3749 | 5.9290  | 26.0082 |
| C24  | 27.6615 | 3.0008  | 17.8191 |
| C25  | 17.9991 | -1.3312 | 19.4734 |
| C26  | 23.1009 | 6.9092  | 26.5753 |
| H27  | 20.9903 | 3.1230  | 22.5931 |
| H28  | 21.0779 | 3.8444  | 24.9494 |
| H29  | 23.5817 | 7.1779  | 23.8377 |
| H30  | 23.4451 | 6.4968  | 21.4973 |
| H31  | 19.3570 | 4.3966  | 19.4264 |
| H32  | 17.6181 | 2.6508  | 19.1888 |
| H33  | 20.5460 | -0.3728 | 20.1209 |
| H34  | 22.2667 | 1.3678  | 20.3799 |
| H35  | 22.9752 | 3.0120  | 17.6823 |
| H36  | 25.1737 | 2.4989  | 16.7273 |
| H37  | 27.0648 | 3.7881  | 20.3722 |
| H38  | 24.8605 | 4.2507  | 21.3613 |
| H39  | 16.8926 | 0.4339  | 19.2693 |
| H40  | 21.7335 | 5.3216  | 26.6529 |
| H41  | 18.9495 | -1.8403 | 19.6361 |
| H42  | 17.1241 | -1.9626 | 19.3232 |
| H43  | 23.7776 | 7.5402  | 25.9976 |
| H44  | 23.0438 | 7.0986  | 27.6464 |
| Rh45 | 23.2136 | 8.8374  | 18.7310 |
| P46  | 21.6474 | 10.6816 | 18.9631 |

|     |         |         |         |
|-----|---------|---------|---------|
| C47 | 20.3548 | 10.3233 | 20.2296 |
| C48 | 20.6881 | 10.9863 | 17.4224 |
| C49 | 22.3241 | 12.3107 | 19.5008 |
| C50 | 22.1131 | 13.5424 | 18.8659 |
| C51 | 22.8455 | 14.6736 | 19.2449 |
| C52 | 23.7887 | 14.6199 | 20.2767 |
| C53 | 23.9004 | 13.4139 | 20.9874 |
| C54 | 23.1946 | 12.2819 | 20.6039 |
| C55 | 19.4473 | 10.3709 | 17.2007 |
| C56 | 18.8653 | 10.3902 | 15.9292 |
| C57 | 19.4820 | 11.0328 | 14.8461 |
| C58 | 20.6862 | 11.7072 | 15.0950 |
| C59 | 21.2893 | 11.6631 | 16.3496 |
| C60 | 20.2691 | 9.0500  | 20.8091 |
| C61 | 19.2931 | 8.7709  | 21.7645 |
| C62 | 18.3739 | 9.7471  | 22.1865 |
| C63 | 18.4724 | 11.0294 | 21.6042 |
| C64 | 19.4407 | 11.3110 | 20.6473 |
| C65 | 18.9218 | 10.8989 | 13.4481 |
| C66 | 24.6825 | 15.7897 | 20.6329 |
| C67 | 17.3807 | 9.3879  | 23.2033 |
| C68 | 19.6738 | 9.8159  | 12.6247 |
| C69 | 16.4660 | 10.1887 | 23.7775 |
| C70 | 26.1938 | 15.4387 | 20.6576 |
| H71 | 21.4019 | 13.6222 | 18.0448 |
| H72 | 22.6951 | 15.6078 | 18.6995 |
| H73 | 24.5828 | 13.3439 | 21.8357 |
| H74 | 23.3479 | 11.3558 | 21.1547 |
| H75 | 18.9426 | 9.8512  | 18.0149 |
| H76 | 17.9179 | 9.8705  | 15.7741 |
| H77 | 21.1853 | 12.2438 | 14.2872 |
| H78 | 22.2476 | 12.1533 | 16.4933 |
| H79 | 20.9837 | 8.2810  | 20.5154 |
| H80 | 19.2521 | 7.7721  | 22.2028 |
| H81 | 17.7792 | 11.8153 | 21.9039 |
| H82 | 19.4919 | 12.3142 | 20.2218 |
| H83 | 18.9657 | 11.8639 | 12.9182 |
| H84 | 24.3941 | 16.1455 | 21.6351 |
| H85 | 17.4152 | 8.3411  | 23.5185 |
| H86 | 18.9642 | 9.3138  | 11.9485 |
| H87 | 20.0224 | 9.0472  | 13.3290 |
| H88 | 16.3705 | 11.2466 | 23.5297 |
| H89 | 15.7744 | 9.7997  | 24.5243 |
| H90 | 26.2986 | 14.3619 | 20.8531 |

|      |         |         |         |
|------|---------|---------|---------|
| H91  | 26.6645 | 15.9443 | 21.5137 |
| P92  | 24.8247 | 9.5067  | 17.0500 |
| C93  | 25.4893 | 11.2260 | 17.1785 |
| C94  | 24.2125 | 9.3620  | 15.3080 |
| C95  | 26.3485 | 8.4498  | 17.0343 |
| C96  | 27.0939 | 8.2385  | 15.8614 |
| C97  | 28.1552 | 7.3335  | 15.8410 |
| C98  | 28.5110 | 6.6011  | 16.9850 |
| C99  | 27.8031 | 6.8605  | 18.1641 |
| C100 | 26.7366 | 7.7606  | 18.1910 |
| C101 | 23.2396 | 8.3836  | 15.0609 |
| C102 | 22.5974 | 8.2927  | 13.8279 |
| C103 | 22.8710 | 9.2087  | 12.8036 |
| C104 | 23.9167 | 10.1211 | 13.0149 |
| C105 | 24.5926 | 10.1872 | 14.2350 |
| C106 | 24.8625 | 12.3010 | 16.5287 |
| C107 | 25.2069 | 13.6165 | 16.8194 |
| C108 | 26.1910 | 13.9277 | 17.7676 |
| C109 | 26.8502 | 12.8552 | 18.3850 |
| C110 | 26.5068 | 11.5294 | 18.1000 |
| C111 | 21.9990 | 9.3148  | 11.5757 |
| C112 | 29.5573 | 5.5113  | 16.9336 |
| C113 | 26.4871 | 15.3886 | 18.0371 |
| C114 | 20.8585 | 10.3425 | 11.7936 |
| C115 | 27.0197 | 15.8098 | 19.4148 |
| H116 | 26.8266 | 8.7607  | 14.9428 |
| H117 | 28.6968 | 7.1717  | 14.9068 |
| H118 | 28.0545 | 6.3129  | 19.0745 |
| H119 | 26.1764 | 7.8957  | 19.1141 |
| H120 | 22.9530 | 7.7040  | 15.8598 |
| H121 | 21.8346 | 7.5253  | 13.6840 |
| H122 | 24.1951 | 10.8128 | 12.2165 |
| H123 | 25.3957 | 10.9140 | 14.3558 |
| H124 | 24.0864 | 12.1119 | 15.7917 |
| H125 | 24.6848 | 14.4289 | 16.3098 |
| H126 | 27.6406 | 13.0471 | 19.1126 |
| H127 | 27.0249 | 10.7216 | 18.6184 |
| H128 | 21.5740 | 8.3334  | 11.3134 |
| H129 | 25.5674 | 15.9548 | 17.8221 |
| H130 | 20.4890 | 10.6869 | 10.8148 |
| H131 | 21.3003 | 11.2251 | 12.2791 |
| H132 | 27.1392 | 16.9052 | 19.3822 |
| H133 | 28.0376 | 15.4107 | 19.5558 |
| H134 | 17.8584 | 10.6286 | 13.5172 |

|      |         |         |         |
|------|---------|---------|---------|
| H135 | 24.4889 | 16.6315 | 19.9502 |
| H136 | 22.6105 | 9.6367  | 10.7193 |
| H137 | 27.2171 | 15.7377 | 17.2864 |
| C138 | 27.7533 | 3.7093  | 16.4462 |
| H139 | 27.9220 | 1.9356  | 17.6984 |
| H140 | 28.4104 | 3.4133  | 18.5115 |
| H141 | 27.0172 | 4.5260  | 16.4218 |
| H142 | 27.4495 | 3.0073  | 15.6553 |
| C143 | 29.1292 | 4.2875  | 16.0896 |
| H144 | 29.7945 | 5.1972  | 17.9609 |
| H145 | 30.4946 | 5.9092  | 16.5135 |
| H146 | 29.9092 | 3.5123  | 16.1686 |
| H147 | 29.1068 | 4.5898  | 15.0305 |
| H148 | 24.0151 | 7.4633  | 18.6612 |

**R1m (IS) Crosslinking mode 1**

| ATOM | X  | Y       | Z       |         |
|------|----|---------|---------|---------|
| P    | 1  | 22.1906 | 7.4580  | 19.2595 |
| C    | 2  | 23.4197 | 6.3386  | 20.0709 |
| C    | 3  | 20.8331 | 7.4615  | 20.5177 |
| C    | 4  | 23.0197 | 9.1029  | 19.3401 |
| C    | 5  | 22.9351 | 10.0641 | 20.3588 |
| C    | 6  | 23.5078 | 11.3299 | 20.1887 |
| C    | 7  | 24.2091 | 11.6666 | 19.0233 |
| C    | 8  | 24.3735 | 10.6654 | 18.0562 |
| C    | 9  | 23.7731 | 9.4214  | 18.1982 |
| C    | 10 | 20.4642 | 6.2461  | 21.1223 |
| C    | 11 | 19.3784 | 6.1774  | 21.9899 |
| C    | 12 | 18.6139 | 7.3110  | 22.3063 |
| C    | 13 | 18.9913 | 8.5227  | 21.7152 |
| C    | 14 | 20.0720 | 8.5969  | 20.8310 |
| C    | 15 | 23.3195 | 4.9493  | 19.8664 |
| C    | 16 | 24.2107 | 4.0675  | 20.4659 |
| C    | 17 | 25.2560 | 4.5376  | 21.2867 |
| C    | 18 | 25.3632 | 5.9293  | 21.4652 |
| C    | 19 | 24.4616 | 6.8156  | 20.8777 |
| C    | 20 | 17.4169 | 7.1779  | 23.2183 |
| C    | 21 | 24.7837 | 13.0494 | 18.7835 |
| C    | 22 | 26.2327 | 3.6574  | 21.9349 |
| C    | 23 | 16.1508 | 6.6838  | 22.4778 |
| C    | 24 | 26.2448 | 2.3134  | 21.9415 |
| C    | 25 | 24.4926 | 13.6391 | 17.3824 |
| H    | 26 | 22.3929 | 9.8466  | 21.2788 |
| H    | 27 | 23.3909 | 12.0774 | 20.9770 |
| H    | 28 | 24.9442 | 10.8708 | 17.1512 |

|   |    |         |         |         |
|---|----|---------|---------|---------|
| H | 29 | 23.8568 | 8.6874  | 17.3943 |
| H | 30 | 21.0359 | 5.3403  | 20.9284 |
| H | 31 | 19.1240 | 5.2165  | 22.4430 |
| H | 32 | 18.4336 | 9.4332  | 21.9434 |
| H | 33 | 20.3238 | 9.5564  | 20.3865 |
| H | 34 | 22.5518 | 4.5664  | 19.1917 |
| H | 35 | 24.1051 | 2.9991  | 20.2765 |
| H | 36 | 26.1721 | 6.3241  | 22.0831 |
| H | 37 | 24.5826 | 7.8876  | 21.0357 |
| H | 38 | 17.2066 | 8.1348  | 23.7207 |
| H | 39 | 25.8780 | 12.9830 | 18.9009 |
| H | 40 | 15.4890 | 6.1765  | 23.1968 |
| H | 41 | 16.4651 | 5.9115  | 21.7611 |
| H | 42 | 27.0366 | 1.7693  | 22.4551 |
| H | 43 | 25.4831 | 1.7144  | 21.4413 |
| H | 44 | 24.4861 | 12.8215 | 16.6489 |
| H | 45 | 25.3385 | 14.2806 | 17.0925 |
| P | 46 | 19.7161 | 8.3343  | 16.7070 |
| C | 47 | 20.1772 | 10.1092 | 16.9420 |
| C | 48 | 18.1560 | 8.1018  | 17.6510 |
| C | 49 | 19.1887 | 8.3339  | 14.9328 |
| C | 50 | 20.1033 | 7.9180  | 13.9482 |
| C | 51 | 19.7627 | 7.9318  | 12.5994 |
| C | 52 | 18.4885 | 8.3524  | 12.1754 |
| C | 53 | 17.5766 | 8.7597  | 13.1680 |
| C | 54 | 17.9175 | 8.7539  | 14.5183 |
| C | 55 | 17.9760 | 6.8442  | 18.2441 |
| C | 56 | 16.8614 | 6.5778  | 19.0385 |
| C | 57 | 15.9115 | 7.5735  | 19.3032 |
| C | 58 | 16.0720 | 8.8175  | 18.6719 |
| C | 59 | 17.1667 | 9.0796  | 17.8487 |
| C | 60 | 19.8400 | 10.8297 | 18.0986 |
| C | 61 | 20.3998 | 12.0793 | 18.3460 |
| C | 62 | 21.3134 | 12.6716 | 17.4621 |
| C | 63 | 21.5971 | 11.9831 | 16.2762 |
| C | 64 | 21.0466 | 10.7220 | 16.0243 |
| C | 65 | 14.8351 | 7.3943  | 20.3458 |
| C | 66 | 18.0673 | 8.3769  | 10.7716 |
| C | 67 | 21.9087 | 14.0073 | 17.8578 |
| C | 68 | 15.3527 | 7.7882  | 21.7526 |
| C | 69 | 23.2169 | 14.4905 | 17.2178 |
| C | 70 | 18.8047 | 8.0724  | 9.6870  |
| H | 71 | 21.0890 | 7.5625  | 14.2548 |
| H | 72 | 20.4961 | 7.5938  | 11.8676 |

|                                     |     |         |         |         |
|-------------------------------------|-----|---------|---------|---------|
| H                                   | 73  | 16.5786 | 9.0853  | 12.8691 |
| H                                   | 74  | 17.1764 | 9.0689  | 15.2512 |
| H                                   | 75  | 18.7442 | 6.0806  | 18.1064 |
| H                                   | 76  | 16.7542 | 5.5902  | 19.4886 |
| H                                   | 77  | 15.3339 | 9.6042  | 18.8449 |
| H                                   | 78  | 17.2614 | 10.0621 | 17.3856 |
| H                                   | 79  | 19.1451 | 10.4075 | 18.8214 |
| H                                   | 80  | 20.1428 | 12.6030 | 19.2698 |
| H                                   | 81  | 22.2813 | 12.4122 | 15.5425 |
| H                                   | 82  | 21.3094 | 10.2055 | 15.1001 |
| H                                   | 83  | 14.4697 | 6.3561  | 20.3599 |
| H                                   | 84  | 17.0292 | 8.6823  | 10.6134 |
| H                                   | 85  | 22.0329 | 13.9946 | 18.9525 |
| H                                   | 86  | 14.4979 | 8.0842  | 22.3801 |
| H                                   | 87  | 15.9724 | 8.6905  | 21.6380 |
| H                                   | 88  | 23.4110 | 15.4892 | 17.6427 |
| H                                   | 89  | 23.0624 | 14.6611 | 16.1397 |
| H                                   | 90  | 19.8470 | 7.7572  | 9.7503  |
| H                                   | 91  | 18.3745 | 8.1306  | 8.6877  |
| H                                   | 92  | 17.6652 | 6.4573  | 24.0126 |
| H                                   | 93  | 24.4421 | 13.7404 | 19.5698 |
| H                                   | 94  | 13.9741 | 8.0291  | 20.0893 |
| H                                   | 95  | 21.1500 | 14.7879 | 17.6699 |
| H                                   | 96  | 27.0347 | 4.1792  | 22.4649 |
| C                                   | 97  | 20.7797 | 5.4410  | 16.0324 |
| O                                   | 98  | 20.3000 | 4.4857  | 15.5592 |
| Rh                                  | 99  | 21.5015 | 6.8058  | 17.0887 |
| C                                   | 100 | 23.8532 | 6.1422  | 15.3576 |
| C                                   | 101 | 23.3791 | 5.8010  | 16.7686 |
| H                                   | 102 | 23.2204 | 5.6802  | 14.5855 |
| H                                   | 103 | 24.8895 | 5.7944  | 15.1885 |
| H                                   | 104 | 23.3011 | 4.7116  | 16.8943 |
| H                                   | 105 | 24.1082 | 6.1491  | 17.5127 |
| H                                   | 106 | 23.8610 | 7.2276  | 15.1678 |
| C                                   | 107 | 26.2442 | 9.2350  | 14.7637 |
| O                                   | 108 | 26.4997 | 10.3386 | 14.9280 |
| <b>R1m (TS) Crosslinking mode 1</b> |     |         |         |         |
| ATOM                                | X   | Y       | Z       |         |
| P                                   | 1   | 22.311  | 7.622   | 19.319  |
| C                                   | 2   | 23.530  | 6.658   | 20.328  |
| C                                   | 3   | 20.852  | 7.679   | 20.467  |
| C                                   | 4   | 23.033  | 9.324   | 19.384  |
| C                                   | 5   | 22.814  | 10.295  | 20.372  |
| C                                   | 6   | 23.321  | 11.590  | 20.220  |

|   |    |        |        |        |
|---|----|--------|--------|--------|
| C | 7  | 24.083 | 11.952 | 19.103 |
| C | 8  | 24.384 | 10.947 | 18.171 |
| C | 9  | 23.850 | 9.670  | 18.296 |
| C | 10 | 20.502 | 6.569  | 21.252 |
| C | 11 | 19.347 | 6.575  | 22.031 |
| C | 12 | 18.490 | 7.685  | 22.068 |
| C | 13 | 18.852 | 8.799  | 21.303 |
| C | 14 | 20.004 | 8.796  | 20.512 |
| C | 15 | 23.411 | 5.257  | 20.418 |
| C | 16 | 24.294 | 4.505  | 21.184 |
| C | 17 | 25.357 | 5.117  | 21.874 |
| C | 18 | 25.486 | 6.512  | 21.760 |
| C | 19 | 24.591 | 7.271  | 21.006 |
| C | 20 | 17.216 | 7.628  | 22.882 |
| C | 21 | 24.553 | 13.373 | 18.872 |
| C | 22 | 26.328 | 4.375  | 22.686 |
| C | 23 | 16.064 | 6.888  | 22.159 |
| C | 24 | 26.341 | 3.056  | 22.948 |
| C | 25 | 24.173 | 13.955 | 17.490 |
| H | 26 | 22.223 | 10.057 | 21.256 |
| H | 27 | 23.092 | 12.340 | 20.981 |
| H | 28 | 25.008 | 11.174 | 17.305 |
| H | 29 | 24.051 | 8.927  | 17.522 |
| H | 30 | 21.141 | 5.689  | 21.278 |
| H | 31 | 19.112 | 5.693  | 22.631 |
| H | 32 | 18.223 | 9.692  | 21.320 |
| H | 33 | 20.244 | 9.680  | 19.928 |
| H | 34 | 22.617 | 4.751  | 19.868 |
| H | 35 | 24.166 | 3.423  | 21.227 |
| H | 36 | 26.310 | 7.012  | 22.273 |
| H | 37 | 24.726 | 8.350  | 20.947 |
| H | 38 | 16.891 | 8.643  | 23.158 |
| H | 39 | 25.652 | 13.392 | 18.957 |
| H | 40 | 15.378 | 6.477  | 22.915 |
| H | 41 | 16.498 | 6.019  | 21.644 |
| H | 42 | 27.122 | 2.623  | 23.570 |
| H | 43 | 25.586 | 2.369  | 22.564 |
| H | 44 | 24.261 | 13.156 | 16.742 |
| H | 45 | 24.929 | 14.702 | 17.205 |
| P | 46 | 20.000 | 8.200  | 16.506 |
| C | 47 | 20.246 | 10.010 | 16.778 |
| C | 48 | 18.386 | 7.818  | 17.311 |
| C | 49 | 19.597 | 8.184  | 14.694 |
| C | 50 | 19.927 | 7.073  | 13.904 |

|   |    |        |        |        |
|---|----|--------|--------|--------|
| C | 51 | 19.599 | 7.029  | 12.553 |
| C | 52 | 18.935 | 8.099  | 11.928 |
| C | 53 | 18.619 | 9.218  | 12.720 |
| C | 54 | 18.941 | 9.261  | 14.075 |
| C | 55 | 18.342 | 6.688  | 18.137 |
| C | 56 | 17.199 | 6.380  | 18.874 |
| C | 57 | 16.077 | 7.216  | 18.842 |
| C | 58 | 16.100 | 8.310  | 17.959 |
| C | 59 | 17.226 | 8.601  | 17.191 |
| C | 60 | 19.599 | 10.732 | 17.793 |
| C | 61 | 20.014 | 12.019 | 18.128 |
| C | 62 | 21.072 | 12.652 | 17.459 |
| C | 63 | 21.639 | 11.972 | 16.374 |
| C | 64 | 21.248 | 10.671 | 16.049 |
| C | 65 | 14.933 | 7.059  | 19.812 |
| C | 66 | 18.587 | 8.107  | 10.502 |
| C | 67 | 21.556 | 13.991 | 17.977 |
| C | 68 | 15.250 | 7.748  | 21.165 |
| C | 69 | 22.800 | 14.650 | 17.365 |
| C | 70 | 18.683 | 7.084  | 9.636  |
| H | 71 | 20.466 | 6.240  | 14.352 |
| H | 72 | 19.884 | 6.153  | 11.972 |
| H | 73 | 18.118 | 10.071 | 12.260 |
| H | 74 | 18.703 | 10.157 | 14.648 |
| H | 75 | 19.235 | 6.067  | 18.230 |
| H | 76 | 17.202 | 5.497  | 19.513 |
| H | 77 | 15.222 | 8.955  | 17.884 |
| H | 78 | 17.204 | 9.456  | 16.515 |
| H | 79 | 18.778 | 10.275 | 18.342 |
| H | 80 | 19.520 | 12.535 | 18.955 |
| H | 81 | 22.430 | 12.441 | 15.790 |
| H | 82 | 21.744 | 10.158 | 15.225 |
| H | 83 | 14.704 | 5.996  | 19.984 |
| H | 84 | 18.206 | 9.062  | 10.130 |
| H | 85 | 21.708 | 13.881 | 19.063 |
| H | 86 | 14.305 | 8.049  | 21.643 |
| H | 87 | 15.790 | 8.682  | 20.948 |
| H | 88 | 22.882 | 15.641 | 17.840 |
| H | 89 | 22.620 | 14.855 | 16.297 |
| H | 90 | 19.032 | 6.094  | 9.932  |
| H | 91 | 18.396 | 7.209  | 8.592  |
| H | 92 | 17.430 | 7.102  | 23.825 |
| H | 93 | 24.180 | 14.026 | 19.677 |
| H | 94 | 14.030 | 7.512  | 19.378 |

|    |     |        |        |        |
|----|-----|--------|--------|--------|
| H  | 95  | 20.727 | 14.714 | 17.883 |
| H  | 96  | 27.122 | 4.990  | 23.118 |
| C  | 97  | 21.074 | 5.205  | 16.427 |
| O  | 98  | 20.543 | 4.178  | 16.230 |
| Rh | 99  | 21.815 | 6.747  | 17.173 |
| C  | 100 | 24.059 | 5.071  | 15.839 |
| C  | 101 | 23.664 | 5.670  | 17.186 |
| H  | 102 | 23.434 | 4.204  | 15.582 |
| H  | 103 | 25.109 | 4.727  | 15.851 |
| H  | 104 | 23.675 | 4.886  | 17.954 |
| H  | 105 | 24.404 | 6.423  | 17.506 |
| H  | 106 | 23.965 | 5.789  | 15.011 |
| C  | 107 | 23.608 | 8.383  | 14.582 |
| O  | 108 | 24.705 | 8.674  | 14.729 |

**R1m (FS) Crosslinking mode 1**

**R2 (IS) Crosslinking mode 1**

| ATOM | X  | Y       | Z       |         |
|------|----|---------|---------|---------|
| P    | 1  | 19.8065 | 9.1404  | 19.1522 |
| C    | 2  | 21.0307 | 7.9903  | 19.9165 |
| C    | 3  | 18.4645 | 9.1844  | 20.4360 |
| C    | 4  | 20.6328 | 10.7886 | 19.3191 |
| C    | 5  | 20.4694 | 11.6752 | 20.3949 |
| C    | 6  | 21.0026 | 12.9680 | 20.3389 |
| C    | 7  | 21.7445 | 13.4052 | 19.2348 |
| C    | 8  | 22.0055 | 12.4707 | 18.2210 |
| C    | 9  | 21.4442 | 11.1991 | 18.2502 |
| C    | 10 | 18.1514 | 8.0717  | 21.2345 |
| C    | 11 | 17.0347 | 8.0800  | 22.0709 |
| C    | 12 | 16.1889 | 9.1963  | 22.1644 |
| C    | 13 | 16.5230 | 10.3160 | 21.3935 |
| C    | 14 | 17.6285 | 10.3080 | 20.5406 |
| C    | 15 | 20.7931 | 6.6012  | 19.8902 |
| C    | 16 | 21.7042 | 5.7040  | 20.4340 |
| C    | 17 | 22.9115 | 6.1515  | 21.0055 |
| C    | 18 | 23.1487 | 7.5373  | 21.0152 |
| C    | 19 | 22.2306 | 8.4413  | 20.4841 |
| C    | 20 | 14.9609 | 9.1485  | 23.0456 |
| C    | 21 | 22.2352 | 14.8306 | 19.0967 |
| C    | 22 | 23.9179 | 5.2493  | 21.5735 |
| C    | 23 | 13.7403 | 8.4736  | 22.3724 |
| C    | 24 | 23.9037 | 3.9054  | 21.5791 |
| C    | 25 | 21.7644 | 15.5399 | 17.8047 |
| H    | 26 | 19.8926 | 11.3773 | 21.2698 |
| H    | 27 | 20.8171 | 13.6534 | 21.1689 |

|   |    |         |         |         |
|---|----|---------|---------|---------|
| H | 28 | 22.6210 | 12.7527 | 17.3650 |
| H | 29 | 21.6051 | 10.5249 | 17.4106 |
| H | 30 | 18.7877 | 7.1887  | 21.2216 |
| H | 31 | 16.8258 | 7.1958  | 22.6773 |
| H | 32 | 15.9078 | 11.2165 | 21.4563 |
| H | 33 | 17.8427 | 11.1958 | 19.9509 |
| H | 34 | 19.8849 | 6.2158  | 19.4245 |
| H | 35 | 21.4784 | 4.6385  | 20.4013 |
| H | 36 | 24.0772 | 7.9137  | 21.4481 |
| H | 37 | 22.4525 | 9.5073  | 20.5112 |
| H | 38 | 14.6860 | 10.1633 | 23.3718 |
| H | 39 | 23.3376 | 14.8143 | 19.0877 |
| H | 40 | 13.0976 | 8.0482  | 23.1583 |
| H | 41 | 14.1068 | 7.6141  | 21.7922 |
| H | 42 | 24.7179 | 3.3434  | 22.0353 |
| H | 43 | 23.0963 | 3.3237  | 21.1324 |
| H | 44 | 21.7714 | 14.8023 | 16.9906 |
| H | 45 | 22.5186 | 16.2906 | 17.5233 |
| P | 46 | 17.3140 | 10.0500 | 16.5279 |
| C | 47 | 17.6324 | 11.8233 | 16.9364 |
| C | 48 | 15.7812 | 9.6185  | 17.4550 |
| C | 49 | 16.7233 | 10.1345 | 14.7824 |
| C | 50 | 16.7984 | 8.9833  | 13.9801 |
| C | 51 | 16.3107 | 8.9858  | 12.6794 |
| C | 52 | 15.7353 | 10.1435 | 12.1203 |
| C | 53 | 15.6681 | 11.2923 | 12.9288 |
| C | 54 | 16.1522 | 11.2934 | 14.2357 |
| C | 55 | 15.7775 | 8.4743  | 18.2588 |
| C | 56 | 14.6693 | 8.1471  | 19.0375 |
| C | 57 | 13.5476 | 8.9827  | 19.0810 |
| C | 58 | 13.5295 | 10.0983 | 18.2264 |
| C | 59 | 14.6176 | 10.4047 | 17.4109 |
| C | 60 | 17.0456 | 12.4746 | 18.0334 |
| C | 61 | 17.5386 | 13.6983 | 18.4829 |
| C | 62 | 18.6117 | 14.3392 | 17.8460 |
| C | 63 | 19.1046 | 13.7490 | 16.6751 |
| C | 64 | 18.6395 | 12.5080 | 16.2374 |
| C | 65 | 12.4631 | 8.7935  | 20.1132 |
| C | 66 | 15.2117 | 10.1985 | 10.7509 |
| C | 67 | 19.1886 | 15.5889 | 18.4784 |
| C | 68 | 12.8821 | 9.3988  | 21.4791 |
| C | 69 | 20.4095 | 16.2761 | 17.8496 |
| C | 70 | 15.3555 | 9.2714  | 9.7864  |
| H | 71 | 17.2600 | 8.0829  | 14.3857 |

|                                     |     |         |         |         |
|-------------------------------------|-----|---------|---------|---------|
| H                                   | 72  | 16.3800 | 8.0717  | 12.0895 |
| H                                   | 73  | 15.2323 | 12.2043 | 12.5173 |
| H                                   | 74  | 16.0926 | 12.2076 | 14.8273 |
| H                                   | 75  | 16.6662 | 7.8470  | 18.2996 |
| H                                   | 76  | 14.7057 | 7.2483  | 19.6535 |
| H                                   | 77  | 12.6506 | 10.7461 | 18.2096 |
| H                                   | 78  | 14.5619 | 11.2709 | 16.7510 |
| H                                   | 79  | 16.2198 | 12.0052 | 18.5648 |
| H                                   | 80  | 17.0928 | 14.1560 | 19.3688 |
| H                                   | 81  | 19.9007 | 14.2335 | 16.1121 |
| H                                   | 82  | 19.0973 | 12.0588 | 15.3572 |
| H                                   | 83  | 12.2222 | 7.7266  | 20.2400 |
| H                                   | 84  | 14.6566 | 11.1105 | 10.5120 |
| H                                   | 85  | 19.4207 | 15.3430 | 19.5276 |
| H                                   | 86  | 11.9748 | 9.6849  | 22.0331 |
| H                                   | 87  | 13.4233 | 10.3361 | 21.2795 |
| H                                   | 88  | 20.5568 | 17.2103 | 18.4152 |
| H                                   | 89  | 20.1609 | 16.5942 | 16.8237 |
| H                                   | 90  | 15.9136 | 8.3474  | 9.9408  |
| H                                   | 91  | 14.9165 | 9.4199  | 8.8007  |
| H                                   | 92  | 15.2097 | 8.5865  | 23.9587 |
| H                                   | 93  | 21.9504 | 15.4157 | 19.9855 |
| H                                   | 94  | 11.5434 | 9.2869  | 19.7660 |
| H                                   | 95  | 18.3861 | 16.3433 | 18.5367 |
| H                                   | 96  | 24.7715 | 5.7544  | 22.0343 |
| C                                   | 97  | 18.3152 | 6.9127  | 16.7214 |
| O                                   | 98  | 17.8946 | 5.8278  | 16.6086 |
| Rh                                  | 99  | 19.2238 | 8.5927  | 16.8017 |
| C                                   | 100 | 21.2249 | 6.6442  | 15.2800 |
| C                                   | 101 | 21.0118 | 7.3049  | 16.6354 |
| H                                   | 102 | 20.3833 | 5.9922  | 15.0059 |
| H                                   | 103 | 22.1326 | 6.0141  | 15.3017 |
| H                                   | 104 | 20.9210 | 6.5451  | 17.4177 |
| H                                   | 105 | 21.8681 | 7.9394  | 16.9019 |
| H                                   | 106 | 21.3527 | 7.3731  | 14.4679 |
| C                                   | 107 | 20.1783 | 9.5851  | 15.4956 |
| O                                   | 108 | 20.8191 | 10.0922 | 14.6591 |
| <b>R1s (IS) Crosslinking mode 1</b> |     |         |         |         |
| ATOM                                | X   | Y       | Z       |         |
| P                                   | 1   | 22.2470 | 7.4245  | 19.3584 |
| C                                   | 2   | 23.4436 | 6.2694  | 20.1607 |
| C                                   | 3   | 20.9018 | 7.5140  | 20.6276 |
| C                                   | 4   | 23.1062 | 9.0521  | 19.4647 |
| C                                   | 5   | 22.9683 | 9.9899  | 20.4980 |

|   |    |         |         |         |
|---|----|---------|---------|---------|
| C | 6  | 23.5730 | 11.2478 | 20.3988 |
| C | 7  | 24.3447 | 11.6044 | 19.2866 |
| C | 8  | 24.5431 | 10.6313 | 18.2956 |
| C | 9  | 23.9261 | 9.3870  | 18.3735 |
| C | 10 | 20.5827 | 6.4046  | 21.4271 |
| C | 11 | 19.4443 | 6.4080  | 22.2313 |
| C | 12 | 18.5838 | 7.5150  | 22.2832 |
| C | 13 | 18.9278 | 8.6355  | 21.5170 |
| C | 14 | 20.0558 | 8.6326  | 20.6954 |
| C | 15 | 23.2771 | 4.8797  | 20.0115 |
| C | 16 | 24.1701 | 3.9811  | 20.5821 |
| C | 17 | 25.2815 | 4.4298  | 21.3227 |
| C | 18 | 25.4436 | 5.8203  | 21.4640 |
| C | 19 | 24.5436 | 6.7239  | 20.9028 |
| C | 20 | 17.3114 | 7.4413  | 23.0934 |
| C | 21 | 24.9595 | 12.9820 | 19.1410 |
| C | 22 | 26.2631 | 3.5284  | 21.9330 |
| C | 23 | 16.1602 | 6.7342  | 22.3385 |
| C | 24 | 26.2524 | 2.1843  | 21.9316 |
| C | 25 | 24.6479 | 13.7000 | 17.8079 |
| H | 26 | 22.3679 | 9.7552  | 21.3766 |
| H | 27 | 23.4275 | 11.9714 | 21.2042 |
| H | 28 | 25.1662 | 10.8552 | 17.4284 |
| H | 29 | 24.0602 | 8.6590  | 17.5682 |
| H | 30 | 21.2297 | 5.5282  | 21.4305 |
| H | 31 | 19.2226 | 5.5267  | 22.8373 |
| H | 32 | 18.2959 | 9.5254  | 21.5506 |
| H | 33 | 20.2743 | 9.5130  | 20.0942 |
| H | 34 | 22.4477 | 4.4926  | 19.4202 |
| H | 35 | 24.0098 | 2.9132  | 20.4326 |
| H | 36 | 26.2984 | 6.2001  | 22.0273 |
| H | 37 | 24.7065 | 7.7937  | 21.0333 |
| H | 38 | 16.9898 | 8.4485  | 23.3994 |
| H | 39 | 26.0537 | 12.8715 | 19.2169 |
| H | 40 | 15.4544 | 6.3264  | 23.0780 |
| H | 41 | 16.5852 | 5.8630  | 21.8178 |
| H | 42 | 27.0486 | 1.6224  | 22.4186 |
| H | 43 | 25.4639 | 1.6028  | 21.4526 |
| H | 44 | 24.6213 | 12.9467 | 17.0087 |
| H | 45 | 25.4955 | 14.3570 | 17.5607 |
| P | 46 | 20.1063 | 8.4826  | 16.5333 |
| C | 47 | 20.4074 | 10.2733 | 16.8605 |
| C | 48 | 18.5917 | 8.0370  | 17.4801 |
| C | 49 | 19.4272 | 8.4459  | 14.8178 |



|   |    |         |         |         |
|---|----|---------|---------|---------|
| C | 50 | 19.2060 | 7.1804  | 14.2448 |
| C | 51 | 18.6533 | 7.0548  | 12.9783 |
| C | 52 | 18.3093 | 8.1918  | 12.2194 |
| C | 53 | 18.5348 | 9.4520  | 12.7998 |
| C | 54 | 19.0809 | 9.5825  | 14.0776 |
| C | 55 | 18.5796 | 6.8448  | 18.2152 |
| C | 56 | 17.4572 | 6.4767  | 18.9581 |
| C | 57 | 16.3248 | 7.2988  | 19.0102 |
| C | 58 | 16.3242 | 8.4652  | 18.2271 |
| C | 59 | 17.4301 | 8.8245  | 17.4607 |
| C | 60 | 19.8640 | 10.9445 | 17.9676 |
| C | 61 | 20.3898 | 12.1620 | 18.3941 |
| C | 62 | 21.4541 | 12.7798 | 17.7215 |
| C | 63 | 21.9127 | 12.1670 | 16.5480 |
| C | 64 | 21.4201 | 10.9268 | 16.1369 |
| C | 65 | 15.1656 | 7.0148  | 19.9342 |
| C | 66 | 17.7457 | 8.1167  | 10.8677 |
| C | 67 | 22.0621 | 14.0307 | 18.3197 |
| C | 68 | 15.3785 | 7.6250  | 21.3433 |
| C | 69 | 23.3814 | 14.5779 | 17.7565 |
| C | 70 | 17.4218 | 7.0073  | 10.1793 |
| H | 71 | 19.4775 | 6.2857  | 14.8076 |
| H | 72 | 18.5012 | 6.0581  | 12.5648 |
| H | 73 | 18.2826 | 10.3506 | 12.2328 |
| H | 74 | 19.2378 | 10.5768 | 14.4962 |
| H | 75 | 19.4705 | 6.2132  | 18.2032 |
| H | 76 | 17.4776 | 5.5427  | 19.5223 |
| H | 77 | 15.4384 | 9.1042  | 18.2194 |
| H | 78 | 17.3856 | 9.7243  | 16.8452 |
| H | 79 | 19.0460 | 10.4927 | 18.5262 |
| H | 80 | 19.9778 | 12.6322 | 19.2899 |
| H | 81 | 22.7086 | 12.6310 | 15.9660 |
| H | 82 | 21.8693 | 10.4425 | 15.2685 |
| H | 83 | 14.9964 | 5.9305  | 20.0233 |
| H | 84 | 17.5814 | 9.0851  | 10.3868 |
| H | 85 | 22.1869 | 13.8465 | 19.3998 |
| H | 86 | 14.3953 | 7.8627  | 21.7771 |
| H | 87 | 15.8920 | 8.5902  | 21.2180 |
| H | 88 | 23.5890 | 15.5062 | 18.3126 |
| H | 89 | 23.2317 | 14.8945 | 16.7110 |
| H | 90 | 17.5486 | 6.0045  | 10.5889 |
| H | 91 | 17.0102 | 7.0735  | 9.1727  |
| H | 92 | 17.5165 | 6.8844  | 24.0200 |
| H | 93 | 24.6649 | 13.6131 | 19.9943 |

|                                     |     |         |         |         |
|-------------------------------------|-----|---------|---------|---------|
| H                                   | 94  | 14.2522 | 7.4411  | 19.4945 |
| H                                   | 95  | 21.3168 | 14.8420 | 18.2581 |
| H                                   | 96  | 27.0912 | 4.0336  | 22.4381 |
| C                                   | 97  | 22.6676 | 5.3607  | 16.8999 |
| O                                   | 98  | 22.9071 | 4.2211  | 16.7872 |
| Rh                                  | 99  | 21.9705 | 7.0905  | 16.9818 |
| C                                   | 100 | 22.6775 | 6.1350  | 13.9701 |
| C                                   | 101 | 22.5662 | 7.3095  | 14.9342 |
| H                                   | 102 | 23.3893 | 5.3748  | 14.3193 |
| H                                   | 103 | 23.0174 | 6.4731  | 12.9755 |
| H                                   | 104 | 23.5706 | 7.7299  | 15.1350 |
| H                                   | 105 | 21.9603 | 8.0958  | 14.4640 |
| H                                   | 106 | 21.7105 | 5.6333  | 13.8206 |
| H                                   | 107 | 17.8762 | 4.2597  | 15.8687 |
| H                                   | 108 | 18.4768 | 3.8091  | 15.8227 |
| <b>R1s (TS) Crosslinking mode 1</b> |     |         |         |         |
| ATOM                                |     | X       | Y       | Z       |
| P                                   | 1   | 21.986  | 7.054   | 19.238  |
| C                                   | 2   | 23.129  | 5.811   | 19.998  |
| C                                   | 3   | 20.578  | 7.107   | 20.436  |
| C                                   | 4   | 22.987  | 8.586   | 19.494  |
| C                                   | 5   | 23.258  | 9.241   | 20.708  |
| C                                   | 6   | 23.975  | 10.442  | 20.713  |
| C                                   | 7   | 24.491  | 10.996  | 19.529  |
| C                                   | 8   | 24.329  | 10.258  | 18.352  |
| C                                   | 9   | 23.562  | 9.101   | 18.328  |
| C                                   | 10  | 19.784  | 5.948   | 20.536  |
| C                                   | 11  | 18.642  | 5.931   | 21.327  |
| C                                   | 12  | 18.219  | 7.070   | 22.034  |
| C                                   | 13  | 19.019  | 8.213   | 21.951  |
| C                                   | 14  | 20.182  | 8.232   | 21.170  |
| C                                   | 15  | 24.274  | 5.457   | 19.261  |
| C                                   | 16  | 25.202  | 4.560   | 19.770  |
| C                                   | 17  | 25.026  | 3.971   | 21.037  |
| C                                   | 18  | 23.883  | 4.334   | 21.768  |
| C                                   | 19  | 22.950  | 5.241   | 21.263  |
| C                                   | 20  | 16.917  | 7.028   | 22.801  |
| C                                   | 21  | 25.203  | 12.335  | 19.503  |
| C                                   | 22  | 25.972  | 3.007   | 21.613  |
| C                                   | 23  | 15.681  | 6.958   | 21.874  |
| C                                   | 24  | 27.086  | 2.517   | 21.044  |
| C                                   | 25  | 24.901  | 13.216  | 18.272  |
| H                                   | 26  | 22.901  | 8.832   | 21.654  |
| H                                   | 27  | 24.127  | 10.967  | 21.659  |

|   |    |        |        |        |
|---|----|--------|--------|--------|
| H | 28 | 24.753 | 10.614 | 17.414 |
| H | 29 | 23.383 | 8.596  | 17.384 |
| H | 30 | 20.052 | 5.059  | 19.964 |
| H | 31 | 18.052 | 5.014  | 21.385 |
| H | 32 | 18.732 | 9.114  | 22.498 |
| H | 33 | 20.766 | 9.149  | 21.120 |
| H | 34 | 24.436 | 5.891  | 18.274 |
| H | 35 | 26.079 | 4.314  | 19.172 |
| H | 36 | 23.721 | 3.894  | 22.754 |
| H | 37 | 22.076 | 5.495  | 21.861 |
| H | 38 | 16.838 | 7.901  | 23.468 |
| H | 39 | 26.290 | 12.145 | 19.520 |
| H | 40 | 14.837 | 6.512  | 22.422 |
| H | 41 | 15.916 | 6.257  | 21.060 |
| H | 42 | 27.712 | 1.800  | 21.575 |
| H | 43 | 27.412 | 2.804  | 20.044 |
| H | 44 | 24.882 | 12.581 | 17.375 |
| H | 45 | 25.753 | 13.897 | 18.120 |
| P | 46 | 19.842 | 8.313  | 16.506 |
| C | 47 | 20.488 | 9.953  | 17.062 |
| C | 48 | 18.163 | 8.281  | 17.303 |
| C | 49 | 19.397 | 8.607  | 14.732 |
| C | 50 | 19.448 | 7.558  | 13.802 |
| C | 51 | 19.041 | 7.739  | 12.485 |
| C | 52 | 18.567 | 8.983  | 12.034 |
| C | 53 | 18.501 | 10.029 | 12.973 |
| C | 54 | 18.908 | 9.848  | 14.293 |
| C | 55 | 17.614 | 7.066  | 17.725 |
| C | 56 | 16.427 | 7.030  | 18.458 |
| C | 57 | 15.766 | 8.209  | 18.825 |
| C | 58 | 16.266 | 9.417  | 18.315 |
| C | 59 | 17.430 | 9.455  | 17.551 |
| C | 60 | 20.276 | 10.326 | 18.400 |
| C | 61 | 20.869 | 11.465 | 18.928 |
| C | 62 | 21.697 | 12.291 | 18.155 |
| C | 63 | 21.877 | 11.943 | 16.809 |
| C | 64 | 21.297 | 10.785 | 16.272 |
| C | 65 | 14.659 | 8.224  | 19.849 |
| C | 66 | 18.142 | 9.228  | 10.651 |
| C | 67 | 22.319 | 13.497 | 18.830 |
| C | 68 | 15.241 | 8.312  | 21.285 |
| C | 69 | 23.634 | 14.093 | 18.306 |
| C | 70 | 18.265 | 8.396  | 9.603  |
| H | 71 | 19.806 | 6.581  | 14.126 |

|                                     |     |         |        |         |
|-------------------------------------|-----|---------|--------|---------|
| H                                   | 72  | 19.093  | 6.894  | 11.799  |
| H                                   | 73  | 18.133  | 11.007 | 12.656  |
| H                                   | 74  | 18.844  | 10.689 | 14.983  |
| H                                   | 75  | 18.162  | 6.144  | 17.528  |
| H                                   | 76  | 16.038  | 6.064  | 18.785  |
| H                                   | 77  | 15.746  | 10.351 | 18.541  |
| H                                   | 78  | 17.795  | 10.419 | 17.198  |
| H                                   | 79  | 19.649  | 9.709  | 19.040  |
| H                                   | 80  | 20.704  | 11.711 | 19.979  |
| H                                   | 81  | 22.504  | 12.562 | 16.165  |
| H                                   | 82  | 21.487  | 10.534 | 15.229  |
| H                                   | 83  | 14.024  | 7.329  | 19.757  |
| H                                   | 84  | 17.686  | 10.208 | 10.480  |
| H                                   | 85  | 22.447  | 13.243 | 19.894  |
| H                                   | 86  | 14.495  | 8.770  | 21.954  |
| H                                   | 87  | 16.096  | 9.005  | 21.257  |
| H                                   | 88  | 23.839  | 14.972 | 18.939  |
| H                                   | 89  | 23.481  | 14.502 | 17.294  |
| H                                   | 90  | 18.724  | 7.410  | 9.685   |
| H                                   | 91  | 17.916  | 8.691  | 8.614   |
| H                                   | 92  | 16.919  | 6.139  | 23.451  |
| H                                   | 93  | 24.988  | 12.888 | 20.431  |
| H                                   | 94  | 14.011  | 9.095  | 19.669  |
| H                                   | 95  | 21.572  | 14.310 | 18.823  |
| H                                   | 96  | 25.711  | 2.664  | 22.618  |
| C                                   | 97  | 22.069  | 4.753  | 16.970  |
| O                                   | 98  | 22.530  | 3.688  | 16.949  |
| Rh                                  | 99  | 21.235  | 6.432  | 16.970  |
| C                                   | 100 | 22.976  | 6.524  | 14.260  |
| C                                   | 101 | 22.859  | 7.214  | 15.620  |
| H                                   | 102 | 23.130  | 5.439  | 14.361  |
| H                                   | 103 | 23.824  | 6.921  | 13.672  |
| H                                   | 104 | 23.812  | 7.089  | 16.158  |
| H                                   | 105 | 22.726  | 8.297  | 15.467  |
| H                                   | 106 | 22.073  | 6.665  | 13.650  |
| H                                   | 107 | 19.988  | 5.726  | 17.747  |
| H                                   | 108 | 20.566  | 5.873  | 15.653  |
| <b>R1s (FS) Crosslinking mode 1</b> |     |         |        |         |
| ATOM                                | X   | Y       | Z      |         |
| P                                   | 1   | 22.0869 | 7.3123 | 19.3843 |
| C                                   | 2   | 23.4034 | 6.2640 | 20.1454 |
| C                                   | 3   | 20.7526 | 7.3620 | 20.6613 |
| C                                   | 4   | 22.9790 | 8.9268 | 19.4310 |
| C                                   | 5   | 23.2114 | 9.7515 | 20.5454 |

|   |    |         |         |         |
|---|----|---------|---------|---------|
| C | 6  | 23.8930 | 10.9638 | 20.3944 |
| C | 7  | 24.4198 | 11.3627 | 19.1539 |
| C | 8  | 24.2925 | 10.4665 | 18.0885 |
| C | 9  | 23.5564 | 9.2949  | 18.2107 |
| C | 10 | 20.1317 | 6.1382  | 20.9815 |
| C | 11 | 18.9927 | 6.1023  | 21.7762 |
| C | 12 | 18.4053 | 7.2792  | 22.2751 |
| C | 13 | 19.0438 | 8.4894  | 21.9875 |
| C | 14 | 20.1995 | 8.5331  | 21.1946 |
| C | 15 | 24.4271 | 5.8145  | 19.2932 |
| C | 16 | 25.5269 | 5.1314  | 19.7913 |
| C | 17 | 25.6507 | 4.8609  | 21.1676 |
| C | 18 | 24.6146 | 5.2997  | 22.0118 |
| C | 19 | 23.5106 | 5.9960  | 21.5163 |
| C | 20 | 17.1022 | 7.1919  | 23.0378 |
| C | 21 | 25.1111 | 12.7002 | 18.9581 |
| C | 22 | 26.8046 | 4.1599  | 21.7394 |
| C | 23 | 15.8857 | 6.9348  | 22.1124 |
| C | 24 | 27.8849 | 3.7022  | 21.0833 |
| C | 25 | 24.8983 | 13.3553 | 17.5775 |
| H | 26 | 22.8513 | 9.4654  | 21.5338 |
| H | 27 | 24.0116 | 11.6175 | 21.2618 |
| H | 28 | 24.7232 | 10.7000 | 17.1162 |
| H | 29 | 23.4029 | 8.6676  | 17.3369 |
| H | 30 | 20.5294 | 5.2081  | 20.5765 |
| H | 31 | 18.5299 | 5.1385  | 21.9989 |
| H | 32 | 18.6304 | 9.4223  | 22.3756 |
| H | 33 | 20.6553 | 9.4986  | 20.9819 |
| H | 34 | 24.3608 | 6.0116  | 18.2229 |
| H | 35 | 26.2972 | 4.8006  | 19.0956 |
| H | 36 | 24.6833 | 5.1004  | 23.0831 |
| H | 37 | 22.7346 | 6.3311  | 22.2052 |
| H | 38 | 16.9375 | 8.1079  | 23.6250 |
| H | 39 | 26.1953 | 12.5471 | 19.0958 |
| H | 40 | 15.1054 | 6.3980  | 22.6743 |
| H | 41 | 16.2111 | 6.2500  | 21.3158 |
| H | 42 | 28.6927 | 3.1980  | 21.6121 |
| H | 43 | 28.0060 | 3.8140  | 20.0047 |
| H | 44 | 24.9589 | 12.5820 | 16.8009 |
| H | 45 | 25.7514 | 14.0215 | 17.3777 |
| P | 46 | 19.7849 | 8.1981  | 16.6274 |
| C | 47 | 20.4240 | 9.9054  | 16.9264 |
| C | 48 | 18.1436 | 8.1715  | 17.4919 |
| C | 49 | 19.2518 | 8.2817  | 14.8579 |

|   |    |         |         |         |
|---|----|---------|---------|---------|
| C | 50 | 19.2785 | 7.1451  | 14.0375 |
| C | 51 | 18.8022 | 7.1890  | 12.7310 |
| C | 52 | 18.2768 | 8.3759  | 12.1883 |
| C | 53 | 18.2492 | 9.5120  | 13.0180 |
| C | 54 | 18.7155 | 9.4676  | 14.3281 |
| C | 55 | 17.6367 | 6.9418  | 17.9310 |
| C | 56 | 16.4616 | 6.8753  | 18.6776 |
| C | 57 | 15.7686 | 8.0355  | 19.0447 |
| C | 58 | 16.2278 | 9.2553  | 18.5246 |
| C | 59 | 17.3822 | 9.3241  | 17.7453 |
| C | 60 | 20.2685 | 10.4969 | 18.1891 |
| C | 61 | 20.8755 | 11.7125 | 18.4873 |
| C | 62 | 21.6688 | 12.3955 | 17.5533 |
| C | 63 | 21.8052 | 11.8174 | 16.2841 |
| C | 64 | 21.2023 | 10.5916 | 15.9769 |
| C | 65 | 14.6748 | 8.0140  | 20.0823 |
| C | 66 | 17.7627 | 8.4804  | 10.8182 |
| C | 67 | 22.2892 | 13.7118 | 17.9776 |
| C | 68 | 15.2735 | 8.2074  | 21.4992 |
| C | 69 | 23.6182 | 14.1936 | 17.3706 |
| C | 70 | 17.6094 | 7.4865  | 9.9254  |
| H | 71 | 19.6879 | 6.2167  | 14.4341 |
| H | 72 | 18.8572 | 6.2872  | 12.1212 |
| H | 73 | 17.8449 | 10.4466 | 12.6256 |
| H | 74 | 18.6636 | 10.3686 | 14.9386 |
| H | 75 | 18.2005 | 6.0319  | 17.7300 |
| H | 76 | 16.1059 | 5.9002  | 19.0149 |
| H | 77 | 15.6822 | 10.1741 | 18.7511 |
| H | 78 | 17.7111 | 10.2956 | 17.3772 |
| H | 79 | 19.6764 | 9.9971  | 18.9533 |
| H | 80 | 20.7516 | 12.1366 | 19.4857 |
| H | 81 | 22.4064 | 12.3116 | 15.5191 |
| H | 82 | 21.3479 | 10.1663 | 14.9840 |
| H | 83 | 14.1125 | 7.0679  | 20.0376 |
| H | 84 | 17.4672 | 9.4897  | 10.5184 |
| H | 85 | 22.3920 | 13.6856 | 19.0733 |
| H | 86 | 14.4955 | 8.5919  | 22.1773 |
| H | 87 | 16.0408 | 8.9940  | 21.4325 |
| H | 88 | 23.7913 | 15.1942 | 17.7993 |
| H | 89 | 23.4954 | 14.3625 | 16.2884 |
| H | 90 | 17.8662 | 6.4511  | 10.1507 |
| H | 91 | 17.2102 | 7.6870  | 8.9317  |
| H | 92 | 17.1755 | 6.3666  | 23.7626 |
| H | 93 | 24.8100 | 13.3922 | 19.7606 |

|                                    |     |         |         |         |
|------------------------------------|-----|---------|---------|---------|
| H                                  | 94  | 13.9567 | 8.8223  | 19.8785 |
| H                                  | 95  | 21.5489 | 14.5077 | 17.7807 |
| H                                  | 96  | 26.7591 | 4.0136  | 22.8223 |
| C                                  | 97  | 22.0657 | 4.7367  | 17.3846 |
| O                                  | 98  | 22.4981 | 3.6590  | 17.3890 |
| Rh                                 | 99  | 21.2295 | 6.4117  | 17.2634 |
| C                                  | 100 | 22.8656 | 6.1043  | 14.5042 |
| C                                  | 101 | 22.7602 | 7.0228  | 15.7186 |
| H                                  | 102 | 23.1510 | 5.0804  | 14.7889 |
| H                                  | 103 | 23.6234 | 6.4618  | 13.7827 |
| H                                  | 104 | 23.7396 | 7.0569  | 16.2215 |
| H                                  | 105 | 22.5374 | 8.0513  | 15.3939 |
| H                                  | 106 | 21.9160 | 6.0298  | 13.9551 |
| H                                  | 107 | 20.0500 | 5.8602  | 18.2222 |
| H                                  | 108 | 20.4346 | 5.6753  | 16.1057 |
| <b>R2 (TS) Crosslinking mode 1</b> |     |         |         |         |
| ATOM                               | X   | Y       | Z       |         |
| P                                  | 1   | 19.744  | 9.342   | 19.374  |
| C                                  | 2   | 20.987  | 8.328   | 20.295  |
| C                                  | 3   | 18.332  | 9.374   | 20.573  |
| C                                  | 4   | 20.462  | 11.045  | 19.459  |
| C                                  | 5   | 20.204  | 12.008  | 20.446  |
| C                                  | 6   | 20.661  | 13.323  | 20.296  |
| C                                  | 7   | 21.419  | 13.71   | 19.186  |
| C                                  | 8   | 21.782  | 12.709  | 18.271  |
| C                                  | 9   | 21.288  | 11.417  | 18.387  |
| C                                  | 10  | 18.021  | 8.251   | 21.358  |
| C                                  | 11  | 16.869  | 8.224   | 22.144  |
| C                                  | 12  | 15.98   | 9.31    | 22.189  |
| C                                  | 13  | 16.307  | 10.436  | 21.425  |
| C                                  | 14  | 17.45   | 10.465  | 20.624  |
| C                                  | 15  | 21.005  | 6.934   | 20.106  |
| C                                  | 16  | 21.902  | 6.125   | 20.797  |
| C                                  | 17  | 22.831  | 6.677   | 21.697  |
| C                                  | 18  | 22.821  | 8.074   | 21.866  |
| C                                  | 19  | 21.918  | 8.886   | 21.183  |
| C                                  | 20  | 14.706  | 9.224   | 22.999  |
| C                                  | 21  | 21.828  | 15.147  | 18.938  |
| C                                  | 22  | 23.805  | 5.875   | 22.447  |
| C                                  | 23  | 13.553  | 8.51    | 22.254  |
| C                                  | 24  | 23.963  | 4.54    | 22.422  |
| C                                  | 25  | 21.462  | 15.679  | 17.532  |
| H                                  | 26  | 19.608  | 11.753  | 21.322  |
| H                                  | 27  | 20.388  | 14.067  | 21.049  |

|   |    |        |        |        |
|---|----|--------|--------|--------|
| H | 28 | 22.412 | 12.954 | 17.415 |
| H | 29 | 21.512 | 10.691 | 17.606 |
| H | 30 | 18.688 | 7.39   | 21.369 |
| H | 31 | 16.66  | 7.334  | 22.742 |
| H | 32 | 15.655 | 11.311 | 21.448 |
| H | 33 | 17.653 | 11.353 | 20.03  |
| H | 34 | 20.301 | 6.483  | 19.403 |
| H | 35 | 21.88  | 5.049  | 20.627 |
| H | 36 | 23.537 | 8.528  | 22.553 |
| H | 37 | 21.942 | 9.964  | 21.338 |
| H | 38 | 14.38  | 10.23  | 23.304 |
| H | 39 | 22.922 | 15.218 | 19.05  |
| H | 40 | 12.838 | 8.126  | 22.998 |
| H | 41 | 13.973 | 7.623  | 21.758 |
| H | 42 | 24.728 | 4.058  | 23.029 |
| H | 43 | 23.347 | 3.888  | 21.802 |
| H | 44 | 21.602 | 14.865 | 16.808 |
| H | 45 | 22.195 | 16.449 | 17.247 |
| P | 46 | 17.467 | 9.766  | 16.463 |
| C | 47 | 17.678 | 11.58  | 16.726 |
| C | 48 | 15.89  | 9.361  | 17.335 |
| C | 49 | 16.989 | 9.659  | 14.685 |
| C | 50 | 17.219 | 8.462  | 13.986 |
| C | 51 | 16.806 | 8.318  | 12.667 |
| C | 52 | 16.158 | 9.366  | 11.988 |
| C | 53 | 15.954 | 10.569 | 12.688 |
| C | 54 | 16.359 | 10.715 | 14.013 |
| C | 55 | 15.884 | 8.322  | 18.271 |
| C | 56 | 14.747 | 8.034  | 19.023 |
| C | 57 | 13.591 | 8.814  | 18.908 |
| C | 58 | 13.575 | 9.811  | 17.916 |
| C | 59 | 14.695 | 10.073 | 17.127 |
| C | 60 | 17.005 | 12.276 | 17.741 |
| C | 61 | 17.375 | 13.576 | 18.079 |
| C | 62 | 18.417 | 14.241 | 17.417 |
| C | 63 | 19.02  | 13.577 | 16.34  |
| C | 64 | 18.674 | 12.265 | 16.009 |
| C | 65 | 12.451 | 8.691  | 19.889 |
| C | 66 | 15.702 | 9.261  | 10.597 |
| C | 67 | 18.834 | 15.604 | 17.933 |
| C | 68 | 12.787 | 9.385  | 21.236 |
| C | 69 | 20.066 | 16.311 | 17.35  |
| C | 70 | 15.719 | 8.169  | 9.811  |
| H | 71 | 17.739 | 7.646  | 14.488 |

|                                    |     |         |         |         |
|------------------------------------|-----|---------|---------|---------|
| H                                  | 72  | 17.005  | 7.379   | 12.151  |
| H                                  | 73  | 15.47   | 11.406  | 12.18   |
| H                                  | 74  | 16.199  | 11.666  | 14.521  |
| H                                  | 75  | 16.795  | 7.75    | 18.436  |
| H                                  | 76  | 14.786  | 7.218   | 19.744  |
| H                                  | 77  | 12.669  | 10.403  | 17.769  |
| H                                  | 78  | 14.642  | 10.851  | 16.365  |
| H                                  | 79  | 16.198  | 11.792  | 18.288  |
| H                                  | 80  | 16.862  | 14.077  | 18.903  |
| H                                  | 81  | 19.808  | 14.067  | 15.769  |
| H                                  | 82  | 19.21   | 11.762  | 15.205  |
| H                                  | 83  | 12.201  | 7.634   | 20.072  |
| H                                  | 84  | 15.296  | 10.186  | 10.179  |
| H                                  | 85  | 18.961  | 15.51   | 19.024  |
| H                                  | 86  | 11.851  | 9.734   | 21.699  |
| H                                  | 87  | 13.367  | 10.293  | 21.01   |
| H                                  | 88  | 20.086  | 17.313  | 17.808  |
| H                                  | 89  | 19.913  | 16.487  | 16.273  |
| H                                  | 90  | 16.092  | 7.203   | 10.155  |
| H                                  | 91  | 15.348  | 8.211   | 8.787   |
| H                                  | 92  | 14.916  | 8.671   | 23.927  |
| H                                  | 93  | 21.404  | 15.799  | 19.718  |
| H                                  | 94  | 11.554  | 9.156   | 19.454  |
| H                                  | 95  | 17.978  | 16.289  | 17.809  |
| H                                  | 96  | 24.463  | 6.459   | 23.096  |
| C                                  | 97  | 18.579  | 6.74    | 17.149  |
| O                                  | 98  | 18.303  | 5.617   | 16.972  |
| Rh                                 | 99  | 19.324  | 8.529   | 17.086  |
| C                                  | 100 | 21.853  | 6.957   | 15.329  |
| C                                  | 101 | 21.57   | 7.89    | 16.493  |
| H                                  | 102 | 21.031  | 6.245   | 15.181  |
| H                                  | 103 | 22.77   | 6.377   | 15.522  |
| H                                  | 104 | 21.416  | 7.331   | 17.425  |
| H                                  | 105 | 22.386  | 8.592   | 16.694  |
| H                                  | 106 | 21.997  | 7.514   | 14.394  |
| C                                  | 107 | 20.453  | 9.241   | 15.768  |
| O                                  | 108 | 20.887  | 9.858   | 14.845  |
| <b>R2 (FS) Crosslinking mode 1</b> |     |         |         |         |
| ATOM                               | X   | Y       | Z       |         |
| P                                  | 1   | 19.8231 | 9.2014  | 19.4089 |
| C                                  | 2   | 21.1153 | 8.0983  | 20.1331 |
| C                                  | 3   | 18.4794 | 9.1396  | 20.6667 |
| C                                  | 4   | 20.5862 | 10.8717 | 19.5457 |
| C                                  | 5   | 20.3786 | 11.8049 | 20.5722 |

|   |    |         |         |         |
|---|----|---------|---------|---------|
| C | 6  | 20.9200 | 13.0917 | 20.4806 |
| C | 7  | 21.6897 | 13.4862 | 19.3804 |
| C | 8  | 21.9544 | 12.5212 | 18.3969 |
| C | 9  | 21.4019 | 11.2484 | 18.4660 |
| C | 10 | 18.2179 | 7.9670  | 21.3959 |
| C | 11 | 17.0806 | 7.8736  | 22.1998 |
| C | 12 | 16.1645 | 8.9308  | 22.3123 |
| C | 13 | 16.4523 | 10.1106 | 21.6108 |
| C | 14 | 17.5742 | 10.2066 | 20.7894 |
| C | 15 | 21.3274 | 6.8317  | 19.5679 |
| C | 16 | 22.2720 | 5.9567  | 20.0946 |
| C | 17 | 23.0553 | 6.3229  | 21.2052 |
| C | 18 | 22.8329 | 7.5948  | 21.7685 |
| C | 19 | 21.8838 | 8.4700  | 21.2471 |
| C | 20 | 14.8881 | 8.7545  | 23.1006 |
| C | 21 | 22.2213 | 14.8965 | 19.2281 |
| C | 22 | 24.0923 | 5.4622  | 21.7841 |
| C | 23 | 13.7074 | 8.2701  | 22.2200 |
| C | 24 | 24.4739 | 4.2443  | 21.3607 |
| C | 25 | 21.8711 | 15.5733 | 17.8818 |
| H | 26 | 19.7722 | 11.5449 | 21.4401 |
| H | 27 | 20.7151 | 13.8099 | 21.2780 |
| H | 28 | 22.5750 | 12.7741 | 17.5361 |
| H | 29 | 21.5803 | 10.5526 | 17.6487 |
| H | 30 | 18.9093 | 7.1259  | 21.3419 |
| H | 31 | 16.8984 | 6.9499  | 22.7531 |
| H | 32 | 15.7790 | 10.9656 | 21.6900 |
| H | 33 | 17.7463 | 11.1228 | 20.2280 |
| H | 34 | 20.7298 | 6.5407  | 18.7027 |
| H | 35 | 22.4066 | 4.9814  | 19.6273 |
| H | 36 | 23.4295 | 7.9019  | 22.6296 |
| H | 37 | 21.7536 | 9.4534  | 21.6995 |
| H | 38 | 14.6128 | 9.6943  | 23.6055 |
| H | 39 | 23.3196 | 14.8544 | 19.3124 |
| H | 40 | 13.0110 | 7.6879  | 22.8431 |
| H | 41 | 14.1102 | 7.5615  | 21.4823 |
| H | 42 | 25.2658 | 3.7011  | 21.8751 |
| H | 43 | 24.0131 | 3.7469  | 20.5067 |
| H | 44 | 21.8637 | 14.8030 | 17.0989 |
| H | 45 | 22.6880 | 16.2594 | 17.6108 |
| P | 46 | 17.3073 | 10.2479 | 16.5738 |
| C | 47 | 17.6644 | 12.0137 | 16.9599 |
| C | 48 | 15.7187 | 9.8825  | 17.4433 |
| C | 49 | 16.8421 | 10.2852 | 14.7887 |

|   |    |         |         |         |
|---|----|---------|---------|---------|
| C | 50 | 17.0835 | 9.1406  | 14.0111 |
| C | 51 | 16.7009 | 9.0890  | 12.6758 |
| C | 52 | 16.0696 | 10.1845 | 12.0573 |
| C | 53 | 15.8417 | 11.3328 | 12.8413 |
| C | 54 | 16.2247 | 11.3871 | 14.1796 |
| C | 55 | 15.5878 | 8.6215  | 18.0420 |
| C | 56 | 14.4745 | 8.2974  | 18.8156 |
| C | 57 | 13.4669 | 9.2418  | 19.0500 |
| C | 58 | 13.5559 | 10.4721 | 18.3775 |
| C | 59 | 14.6556 | 10.7892 | 17.5807 |
| C | 60 | 17.2077 | 12.6215 | 18.1421 |
| C | 61 | 17.7274 | 13.8388 | 18.5713 |
| C | 62 | 18.7210 | 14.5118 | 17.8450 |
| C | 63 | 19.1279 | 13.9376 | 16.6338 |
| C | 64 | 18.6253 | 12.7069 | 16.2027 |
| C | 65 | 12.3994 | 9.0211  | 20.0952 |
| C | 66 | 15.6580 | 10.1843 | 10.6498 |
| C | 67 | 19.2856 | 15.7957 | 18.4176 |
| C | 68 | 12.9223 | 9.3903  | 21.5084 |
| C | 69 | 20.5683 | 16.3951 | 17.8251 |
| C | 70 | 15.6885 | 9.1504  | 9.7922  |
| H | 71 | 17.5874 | 8.2906  | 14.4746 |
| H | 72 | 16.8980 | 8.1818  | 12.1045 |
| H | 73 | 15.3549 | 12.1969 | 12.3856 |
| H | 74 | 16.0475 | 12.2985 | 14.7513 |
| H | 75 | 16.3838 | 7.8829  | 17.9120 |
| H | 76 | 14.4169 | 7.3101  | 19.2747 |
| H | 77 | 12.7613 | 11.2103 | 18.5079 |
| H | 78 | 14.6935 | 11.7592 | 17.0847 |
| H | 79 | 16.4560 | 12.1249 | 18.7523 |
| H | 80 | 17.3739 | 14.2643 | 19.5132 |
| H | 81 | 19.8767 | 14.4365 | 16.0186 |
| H | 82 | 19.0181 | 12.2642 | 15.2879 |
| H | 83 | 12.0517 | 7.9764  | 20.0886 |
| H | 84 | 15.2838 | 11.1449 | 10.2847 |
| H | 85 | 19.4346 | 15.6355 | 19.4982 |
| H | 86 | 12.0719 | 9.6870  | 22.1420 |
| H | 87 | 13.5503 | 10.2876 | 21.4049 |
| H | 88 | 20.7397 | 17.3435 | 18.3599 |
| H | 89 | 20.3914 | 16.6812 | 16.7753 |
| H | 90 | 16.0268 | 8.1557  | 10.0855 |
| H | 91 | 15.3718 | 9.2733  | 8.7570  |
| H | 92 | 15.0663 | 8.0154  | 23.8958 |
| H | 93 | 21.8812 | 15.5189 | 20.0709 |

|                                    |     |         |         |         |
|------------------------------------|-----|---------|---------|---------|
| H                                  | 94  | 11.5257 | 9.6457  | 19.8586 |
| H                                  | 95  | 18.5035 | 16.5717 | 18.3546 |
| H                                  | 96  | 24.5924 | 5.8840  | 22.6606 |
| C                                  | 97  | 18.6748 | 6.6983  | 16.9256 |
| O                                  | 98  | 18.3959 | 5.5626  | 16.8136 |
| Rh                                 | 99  | 18.8710 | 8.5389  | 17.2982 |
| C                                  | 100 | 20.7263 | 7.1689  | 14.0760 |
| C                                  | 101 | 21.1866 | 7.6584  | 15.4545 |
| H                                  | 102 | 19.7189 | 6.7350  | 14.1273 |
| H                                  | 103 | 21.4111 | 6.3950  | 13.7038 |
| H                                  | 104 | 21.1961 | 6.8367  | 16.1765 |
| H                                  | 105 | 22.2048 | 8.0703  | 15.3824 |
| H                                  | 106 | 20.7127 | 7.9953  | 13.3536 |
| C                                  | 107 | 20.2981 | 8.7977  | 15.9532 |
| O                                  | 108 | 20.4482 | 9.9327  | 15.5334 |
| <b>R3 (IS) Crosslinking mode 1</b> |     |         |         |         |
| ATOM                               |     | X       | Y       | Z       |
| P                                  | 1   | 19.8438 | 9.2056  | 19.4063 |
| C                                  | 2   | 21.1456 | 8.1083  | 20.1204 |
| C                                  | 3   | 18.4999 | 9.1469  | 20.6662 |
| C                                  | 4   | 20.6038 | 10.8769 | 19.5392 |
| C                                  | 5   | 20.4037 | 11.8072 | 20.5704 |
| C                                  | 6   | 20.9384 | 13.0968 | 20.4757 |
| C                                  | 7   | 21.6992 | 13.4955 | 19.3703 |
| C                                  | 8   | 21.9586 | 12.5330 | 18.3830 |
| C                                  | 9   | 21.4094 | 11.2585 | 18.4535 |
| C                                  | 10  | 18.2434 | 7.9853  | 21.4140 |
| C                                  | 11  | 17.1012 | 7.8952  | 22.2115 |
| C                                  | 12  | 16.1796 | 8.9490  | 22.3077 |
| C                                  | 13  | 16.4652 | 10.1212 | 21.5921 |
| C                                  | 14  | 17.5899 | 10.2119 | 20.7737 |
| C                                  | 15  | 21.1955 | 6.7593  | 19.7310 |
| C                                  | 16  | 22.1429 | 5.8905  | 20.2633 |
| C                                  | 17  | 23.0962 | 6.3464  | 21.1941 |
| C                                  | 18  | 23.0460 | 7.7027  | 21.5688 |
| C                                  | 19  | 22.0902 | 8.5719  | 21.0481 |
| C                                  | 20  | 14.9003 | 8.7734  | 23.0919 |
| C                                  | 21  | 22.2278 | 14.9066 | 19.2161 |
| C                                  | 22  | 24.1415 | 5.4926  | 21.7672 |
| C                                  | 23  | 13.7223 | 8.2861  | 22.2088 |
| C                                  | 24  | 24.3505 | 4.1836  | 21.5404 |
| C                                  | 25  | 21.8737 | 15.5820 | 17.8702 |
| H                                  | 26  | 19.8077 | 11.5422 | 21.4438 |
| H                                  | 27  | 20.7394 | 13.8123 | 21.2771 |

|   |    |         |         |         |
|---|----|---------|---------|---------|
| H | 28 | 22.5706 | 12.7895 | 17.5172 |
| H | 29 | 21.5800 | 10.5671 | 17.6311 |
| H | 30 | 18.9357 | 7.1445  | 21.3718 |
| H | 31 | 16.9211 | 6.9766  | 22.7741 |
| H | 32 | 15.7896 | 10.9753 | 21.6608 |
| H | 33 | 17.7604 | 11.1226 | 20.2031 |
| H | 34 | 20.4800 | 6.4004  | 18.9894 |
| H | 35 | 22.1525 | 4.8517  | 19.9337 |
| H | 36 | 23.7787 | 8.0787  | 22.2853 |
| H | 37 | 22.0853 | 9.6163  | 21.3596 |
| H | 38 | 14.6224 | 9.7144  | 23.5932 |
| H | 39 | 23.3264 | 14.8672 | 19.2988 |
| H | 40 | 13.0278 | 7.6994  | 22.8298 |
| H | 41 | 14.1291 | 7.5812  | 21.4696 |
| H | 42 | 25.1738 | 3.6627  | 22.0280 |
| H | 43 | 23.7216 | 3.5901  | 20.8758 |
| H | 44 | 21.8661 | 14.8116 | 17.0874 |
| H | 45 | 22.6884 | 16.2698 | 17.5969 |
| P | 46 | 17.3229 | 10.2422 | 16.5763 |
| C | 47 | 17.6797 | 12.0076 | 16.9651 |
| C | 48 | 15.7226 | 9.8818  | 17.4264 |
| C | 49 | 16.8738 | 10.2929 | 14.7876 |
| C | 50 | 17.1284 | 9.1582  | 14.0004 |
| C | 51 | 16.7618 | 9.1222  | 12.6596 |
| C | 52 | 16.1261 | 10.2197 | 12.0488 |
| C | 53 | 15.8861 | 11.3586 | 12.8428 |
| C | 54 | 16.2515 | 11.3969 | 14.1866 |
| C | 55 | 15.5866 | 8.6208  | 18.0233 |
| C | 56 | 14.4741 | 8.3013  | 18.7999 |
| C | 57 | 13.4733 | 9.2513  | 19.0405 |
| C | 58 | 13.5670 | 10.4825 | 18.3700 |
| C | 59 | 14.6626 | 10.7924 | 17.5645 |
| C | 60 | 17.2129 | 12.6219 | 18.1402 |
| C | 61 | 17.7304 | 13.8409 | 18.5675 |
| C | 62 | 18.7286 | 14.5104 | 17.8437 |
| C | 63 | 19.1414 | 13.9323 | 16.6363 |
| C | 64 | 18.6414 | 12.6995 | 16.2079 |
| C | 65 | 12.4073 | 9.0328  | 20.0874 |
| C | 66 | 15.7069 | 10.2285 | 10.6433 |
| C | 67 | 19.2880 | 15.7986 | 18.4115 |
| C | 68 | 12.9325 | 9.4042  | 21.4993 |
| C | 69 | 20.5687 | 16.4003 | 17.8169 |
| C | 70 | 15.7356 | 9.2015  | 9.7767  |
| H | 71 | 17.6251 | 8.3024  | 14.4612 |

|                                    |     |         |         |         |
|------------------------------------|-----|---------|---------|---------|
| H                                  | 72  | 16.9799 | 8.2272  | 12.0767 |
| H                                  | 73  | 15.4020 | 12.2265 | 12.3915 |
| H                                  | 74  | 16.0637 | 12.3008 | 14.7669 |
| H                                  | 75  | 16.3781 | 7.8780  | 17.8904 |
| H                                  | 76  | 14.4108 | 7.3115  | 19.2529 |
| H                                  | 77  | 12.7742 | 11.2228 | 18.5001 |
| H                                  | 78  | 14.7047 | 11.7637 | 17.0712 |
| H                                  | 79  | 16.4495 | 12.1333 | 18.7422 |
| H                                  | 80  | 17.3667 | 14.2738 | 19.5021 |
| H                                  | 81  | 19.8934 | 14.4290 | 16.0232 |
| H                                  | 82  | 19.0388 | 12.2536 | 15.2964 |
| H                                  | 83  | 12.0586 | 7.9884  | 20.0831 |
| H                                  | 84  | 15.3268 | 11.1904 | 10.2875 |
| H                                  | 85  | 19.4359 | 15.6436 | 19.4931 |
| H                                  | 86  | 12.0830 | 9.6989  | 22.1352 |
| H                                  | 87  | 13.5575 | 10.3033 | 21.3940 |
| H                                  | 88  | 20.7385 | 17.3493 | 18.3513 |
| H                                  | 89  | 20.3892 | 16.6860 | 16.7674 |
| H                                  | 90  | 16.0840 | 8.2067  | 10.0580 |
| H                                  | 91  | 15.3968 | 9.3280  | 8.7490  |
| H                                  | 92  | 15.0762 | 8.0364  | 23.8896 |
| H                                  | 93  | 21.8874 | 15.5284 | 20.0592 |
| H                                  | 94  | 11.5336 | 9.6577  | 19.8515 |
| H                                  | 95  | 18.5035 | 16.5720 | 18.3447 |
| H                                  | 96  | 24.8200 | 6.0076  | 22.4538 |
| C                                  | 97  | 18.6726 | 6.6765  | 16.9803 |
| O                                  | 98  | 18.4121 | 5.5339  | 16.8941 |
| Rh                                 | 99  | 18.8641 | 8.5222  | 17.3231 |
| C                                  | 100 | 20.7877 | 7.0537  | 14.1995 |
| C                                  | 101 | 21.2206 | 7.6041  | 15.5638 |
| H                                  | 102 | 19.7854 | 6.6082  | 14.2528 |
| H                                  | 103 | 21.4889 | 6.2752  | 13.8699 |
| H                                  | 104 | 21.2259 | 6.8144  | 16.3209 |
| H                                  | 105 | 22.2361 | 8.0230  | 15.4913 |
| H                                  | 106 | 20.7743 | 7.8493  | 13.4434 |
| C                                  | 107 | 20.3149 | 8.7545  | 16.0016 |
| O                                  | 108 | 20.4746 | 9.8788  | 15.5564 |
| H                                  | 109 | 16.9446 | 4.8575  | 19.4247 |
| H                                  | 110 | 16.4793 | 5.0324  | 19.9896 |
| <b>R3 (TS) Crosslinking mode 1</b> |     |         |         |         |
| ATOM                               | X   | Y       | Z       |         |
| P                                  | 1   | 19.701  | 9.040   | 19.557  |
| C                                  | 2   | 20.964  | 7.887   | 20.260  |
| C                                  | 3   | 18.423  | 9.103   | 20.884  |

|   |    |        |        |        |
|---|----|--------|--------|--------|
| C | 4  | 20.582 | 10.657 | 19.611 |
| C | 5  | 20.451 | 11.638 | 20.605 |
| C | 6  | 21.066 | 12.887 | 20.455 |
| C | 7  | 21.842 | 13.192 | 19.329 |
| C | 8  | 22.028 | 12.177 | 18.380 |
| C | 9  | 21.401 | 10.945 | 18.508 |
| C | 10 | 18.150 | 7.998  | 21.705 |
| C | 11 | 16.950 | 7.923  | 22.419 |
| C | 12 | 15.989 | 8.943  | 22.355 |
| C | 13 | 16.321 | 10.093 | 21.621 |
| C | 14 | 17.502 | 10.164 | 20.889 |
| C | 15 | 20.954 | 6.534  | 19.882 |
| C | 16 | 21.877 | 5.635  | 20.407 |
| C | 17 | 22.857 | 6.058  | 21.326 |
| C | 18 | 22.861 | 7.415  | 21.697 |
| C | 19 | 21.935 | 8.317  | 21.177 |
| C | 20 | 14.613 | 8.762  | 22.956 |
| C | 21 | 22.481 | 14.551 | 19.121 |
| C | 22 | 23.872 | 5.164  | 21.895 |
| C | 23 | 13.531 | 8.489  | 21.872 |
| C | 24 | 24.041 | 3.853  | 21.652 |
| C | 25 | 22.302 | 15.149 | 17.703 |
| H | 26 | 19.848 | 11.445 | 21.492 |
| H | 27 | 20.925 | 13.645 | 21.230 |
| H | 28 | 22.645 | 12.357 | 17.500 |
| H | 29 | 21.528 | 10.210 | 17.716 |
| H | 30 | 18.854 | 7.167  | 21.753 |
| H | 31 | 16.743 | 7.029  | 23.012 |
| H | 32 | 15.624 | 10.932 | 21.581 |
| H | 33 | 17.702 | 11.045 | 20.285 |
| H | 34 | 20.212 | 6.197  | 19.156 |
| H | 35 | 21.842 | 4.593  | 20.087 |
| H | 36 | 23.610 | 7.768  | 22.407 |
| H | 37 | 21.973 | 9.363  | 21.482 |
| H | 38 | 14.331 | 9.651  | 23.543 |
| H | 39 | 23.562 | 14.443 | 19.310 |
| H | 40 | 12.821 | 7.734  | 22.244 |
| H | 41 | 14.028 | 8.036  | 21.002 |
| H | 42 | 24.845 | 3.301  | 22.137 |
| H | 43 | 23.398 | 3.286  | 20.977 |
| H | 44 | 22.224 | 14.326 | 16.980 |
| H | 45 | 23.220 | 15.693 | 17.432 |
| P | 46 | 17.237 | 10.247 | 16.663 |
| C | 47 | 17.816 | 11.978 | 16.952 |

|   |    |        |        |        |
|---|----|--------|--------|--------|
| C | 48 | 15.524 | 10.184 | 17.379 |
| C | 49 | 16.879 | 10.240 | 14.848 |
| C | 50 | 17.201 | 9.113  | 14.079 |
| C | 51 | 16.887 | 9.060  | 12.724 |
| C | 52 | 16.241 | 10.133 | 12.084 |
| C | 53 | 15.921 | 11.261 | 12.864 |
| C | 54 | 16.230 | 11.313 | 14.221 |
| C | 55 | 14.969 | 8.909  | 17.566 |
| C | 56 | 13.813 | 8.727  | 18.327 |
| C | 57 | 13.179 | 9.813  | 18.945 |
| C | 58 | 13.645 | 11.098 | 18.627 |
| C | 59 | 14.787 | 11.286 | 17.845 |
| C | 60 | 17.589 | 12.618 | 18.182 |
| C | 61 | 18.218 | 13.815 | 18.500 |
| C | 62 | 19.110 | 14.436 | 17.615 |
| C | 63 | 19.318 | 13.817 | 16.376 |
| C | 64 | 18.694 | 12.607 | 16.052 |
| C | 65 | 12.123 | 9.627  | 20.008 |
| C | 66 | 15.901 | 10.132 | 10.656 |
| C | 67 | 19.752 | 15.736 | 18.050 |
| C | 68 | 12.735 | 9.729  | 21.428 |
| C | 69 | 21.129 | 16.124 | 17.494 |
| C | 70 | 16.016 | 9.110  | 9.791  |
| H | 71 | 17.702 | 8.273  | 14.561 |
| H | 72 | 17.161 | 8.173  | 12.152 |
| H | 73 | 15.421 | 12.108 | 12.393 |
| H | 74 | 15.974 | 12.205 | 14.794 |
| H | 75 | 15.475 | 8.041  | 17.142 |
| H | 76 | 13.429 | 7.717  | 18.481 |
| H | 77 | 13.129 | 11.971 | 19.034 |
| H | 78 | 15.118 | 12.301 | 17.631 |
| H | 79 | 16.913 | 12.176 | 18.909 |
| H | 80 | 18.029 | 14.273 | 19.473 |
| H | 81 | 20.000 | 14.262 | 15.649 |
| H | 82 | 18.917 | 12.132 | 15.097 |
| H | 83 | 11.617 | 8.656  | 19.886 |
| H | 84 | 15.509 | 11.082 | 10.281 |
| H | 85 | 19.804 | 15.725 | 19.151 |
| H | 86 | 11.931 | 9.921  | 22.157 |
| H | 87 | 13.382 | 10.619 | 21.449 |
| H | 88 | 21.389 | 17.092 | 17.954 |
| H | 89 | 21.049 | 16.328 | 16.413 |
| H | 90 | 16.380 | 8.126  | 10.088 |
| H | 91 | 15.734 | 9.232  | 8.746  |



|                                    |     |         |         |         |
|------------------------------------|-----|---------|---------|---------|
| H                                  | 92  | 14.645  | 7.922   | 23.664  |
| H                                  | 93  | 22.118  | 15.256  | 19.884  |
| H                                  | 94  | 11.350  | 10.403  | 19.903  |
| H                                  | 95  | 19.059  | 16.561  | 17.808  |
| H                                  | 96  | 24.565  | 5.648   | 22.590  |
| C                                  | 97  | 18.402  | 6.587   | 16.931  |
| O                                  | 98  | 18.225  | 5.475   | 16.603  |
| Rh                                 | 99  | 18.575  | 8.384   | 17.521  |
| C                                  | 100 | 21.127  | 7.001   | 14.687  |
| C                                  | 101 | 21.172  | 7.641   | 16.080  |
| H                                  | 102 | 20.206  | 6.419   | 14.549  |
| H                                  | 103 | 21.978  | 6.319   | 14.558  |
| H                                  | 104 | 21.115  | 6.882   | 16.866  |
| H                                  | 105 | 22.122  | 8.185   | 16.204  |
| H                                  | 106 | 21.172  | 7.769   | 13.904  |
| C                                  | 107 | 20.065  | 8.688   | 16.244  |
| O                                  | 108 | 20.109  | 9.721   | 15.599  |
| H                                  | 109 | 16.547  | 7.665   | 19.195  |
| H                                  | 110 | 17.139  | 7.215   | 19.041  |
| <b>R3 (FS) Crosslinking mode 1</b> |     |         |         |         |
| <b>R4 (IS) Crosslinking mode 1</b> |     |         |         |         |
| ATOM                               | X   | Y       | Z       |         |
| P P                                | 1   | 19.8067 | 9.1932  | 19.2763 |
| C                                  | 2   | 21.0717 | 8.0928  | 20.0692 |
| C                                  | 3   | 18.4800 | 9.1964  | 20.5776 |
| C                                  | 4   | 20.5971 | 10.8579 | 19.3537 |
| C                                  | 5   | 20.6438 | 11.7105 | 20.4719 |
| C                                  | 6   | 21.1875 | 12.9945 | 20.3588 |
| C                                  | 7   | 21.7217 | 13.4636 | 19.1503 |
| C                                  | 8   | 21.7707 | 12.5653 | 18.0769 |
| C                                  | 9   | 21.1989 | 11.3030 | 18.1705 |
| C                                  | 10  | 18.0379 | 7.9567  | 21.0716 |
| C                                  | 11  | 16.9480 | 7.8754  | 21.9308 |
| C                                  | 12  | 16.2378 | 9.0196  | 22.3322 |
| C                                  | 13  | 16.7035 | 10.2546 | 21.8717 |
| C                                  | 14  | 17.8039 | 10.3442 | 21.0097 |
| C                                  | 15  | 21.0539 | 6.7016  | 19.8593 |
| C                                  | 16  | 21.9487 | 5.8616  | 20.5127 |
| C                                  | 17  | 22.9099 | 6.3739  | 21.4055 |
| C                                  | 18  | 22.9310 | 7.7673  | 21.5987 |
| C                                  | 19  | 22.0305 | 8.6112  | 20.9527 |
| C                                  | 20  | 14.9924 | 8.8720  | 23.1755 |
| C                                  | 21  | 22.2338 | 14.8793 | 18.9774 |
| C                                  | 22  | 23.8795 | 5.5395  | 22.1193 |

|   |    |         |         |         |
|---|----|---------|---------|---------|
| C | 23 | 13.7590 | 8.4536  | 22.3392 |
| C | 24 | 24.0065 | 4.2006  | 22.0726 |
| C | 25 | 21.7473 | 15.5894 | 17.6932 |
| H | 26 | 20.2378 | 11.3897 | 21.4305 |
| H | 27 | 21.1695 | 13.6555 | 21.2284 |
| H | 28 | 22.2134 | 12.8647 | 17.1272 |
| H | 29 | 21.1847 | 10.6665 | 17.2917 |
| H | 30 | 18.5449 | 7.0390  | 20.7758 |
| H | 31 | 16.6293 | 6.8935  | 22.2870 |
| H | 32 | 16.1973 | 11.1719 | 22.1799 |
| H | 33 | 18.1229 | 11.3256 | 20.6696 |
| H | 34 | 20.3326 | 6.2779  | 19.1604 |
| H | 35 | 21.8990 | 4.7899  | 20.3211 |
| H | 36 | 23.6729 | 8.1958  | 22.2753 |
| H | 37 | 22.0936 | 9.6839  | 21.1275 |
| H | 38 | 14.7809 | 9.8065  | 23.7174 |
| H | 39 | 23.3355 | 14.8370 | 18.9412 |
| H | 40 | 13.0515 | 7.9084  | 22.9836 |
| H | 41 | 14.0999 | 7.7297  | 21.5850 |
| H | 42 | 24.7748 | 3.6944  | 22.6555 |
| H | 43 | 23.3642 | 3.5689  | 21.4581 |
| H | 44 | 21.7243 | 14.8562 | 16.8756 |
| H | 45 | 22.5038 | 16.3314 | 17.3964 |
| P | 46 | 17.2893 | 10.0349 | 16.6143 |
| C | 47 | 17.7104 | 11.7845 | 17.0206 |
| C | 48 | 15.6831 | 9.7819  | 17.5057 |
| C | 49 | 16.7866 | 10.1481 | 14.8385 |
| C | 50 | 17.2884 | 9.2460  | 13.8903 |
| C | 51 | 16.8779 | 9.2927  | 12.5625 |
| C | 52 | 15.9487 | 10.2529 | 12.1224 |
| C | 53 | 15.4647 | 11.1708 | 13.0739 |
| C | 54 | 15.8717 | 11.1222 | 14.4039 |
| C | 55 | 15.4100 | 8.5237  | 18.0595 |
| C | 56 | 14.2909 | 8.3180  | 18.8684 |
| C | 57 | 13.4263 | 9.3728  | 19.1848 |
| C | 58 | 13.6478 | 10.6068 | 18.5532 |
| C | 59 | 14.7442 | 10.8074 | 17.7170 |
| C | 60 | 17.4054 | 12.2924 | 18.2929 |
| C | 61 | 17.8861 | 13.5286 | 18.7074 |
| C | 62 | 18.6824 | 14.3241 | 17.8714 |
| C | 63 | 18.9322 | 13.8441 | 16.5786 |
| C | 64 | 18.4695 | 12.5913 | 16.1581 |
| C | 65 | 12.3948 | 9.2598  | 20.2804 |
| C | 66 | 15.4797 | 10.3488 | 10.7359 |

|    |     |         |         |         |
|----|-----|---------|---------|---------|
| C  | 67  | 19.2021 | 15.6356 | 18.4254 |
| C  | 68  | 13.0194 | 9.6175  | 21.6549 |
| C  | 69  | 20.3995 | 16.3313 | 17.7640 |
| C  | 70  | 15.7333 | 9.4946  | 9.7282  |
| H  | 71  | 18.0317 | 8.5123  | 14.1911 |
| H  | 72  | 17.2998 | 8.5795  | 11.8545 |
| H  | 73  | 14.7509 | 11.9341 | 12.7588 |
| H  | 74  | 15.4800 | 11.8582 | 15.1049 |
| H  | 75  | 16.1151 | 7.7088  | 17.9038 |
| H  | 76  | 14.1238 | 7.3296  | 19.2990 |
| H  | 77  | 12.9687 | 11.4393 | 18.7492 |
| H  | 78  | 14.8960 | 11.7933 | 17.2797 |
| H  | 79  | 16.7941 | 11.7042 | 18.9723 |
| H  | 80  | 17.6501 | 13.8792 | 19.7151 |
| H  | 81  | 19.5282 | 14.4385 | 15.8846 |
| H  | 82  | 18.7359 | 12.2275 | 15.1665 |
| H  | 83  | 11.9691 | 8.2452  | 20.3168 |
| H  | 84  | 14.8508 | 11.2190 | 10.5272 |
| H  | 85  | 19.4305 | 15.4694 | 19.4906 |
| H  | 86  | 12.2334 | 9.9881  | 22.3315 |
| H  | 87  | 13.7101 | 10.4606 | 21.4984 |
| H  | 88  | 20.5535 | 17.2702 | 18.3202 |
| H  | 89  | 20.1295 | 16.6421 | 16.7418 |
| H  | 90  | 16.3363 | 8.5955  | 9.8601  |
| H  | 91  | 15.3260 | 9.6698  | 8.7331  |
| H  | 92  | 15.1778 | 8.1031  | 23.9418 |
| H  | 93  | 21.9879 | 15.4781 | 19.8684 |
| H  | 94  | 11.5622 | 9.9473  | 20.0697 |
| H  | 95  | 18.3693 | 16.3603 | 18.4259 |
| H  | 96  | 24.5657 | 6.0980  | 22.7626 |
| C  | 97  | 18.3978 | 6.9597  | 16.0480 |
| O  | 98  | 18.0435 | 6.0006  | 15.4945 |
| Rh | 99  | 19.0103 | 8.3345  | 17.1760 |
| C  | 100 | 21.7376 | 7.3034  | 14.6776 |
| C  | 101 | 21.8008 | 8.5149  | 15.6150 |
| H  | 102 | 21.0401 | 6.5429  | 15.0538 |
| H  | 103 | 22.7277 | 6.8359  | 14.5870 |
| H  | 104 | 22.1539 | 8.2010  | 16.6071 |
| H  | 105 | 22.4937 | 9.2668  | 15.2042 |
| H  | 106 | 21.4085 | 7.6054  | 13.6739 |
| C  | 107 | 20.4160 | 9.1716  | 15.7557 |
| O  | 108 | 20.1501 | 10.0980 | 14.9960 |
| H  | 109 | 18.0866 | 7.5650  | 18.2857 |
| H  | 110 | 20.1478 | 7.2795  | 17.4664 |

| <b>R4 (TS) Crosslinking mode 1</b> |        |        |        |
|------------------------------------|--------|--------|--------|
| ATOM                               | X      | Y      | Z      |
| P1                                 | 19.639 | 9.125  | 19.353 |
| C2                                 | 20.943 | 8.042  | 20.164 |
| C3                                 | 18.352 | 9.142  | 20.696 |
| C4                                 | 20.452 | 10.789 | 19.390 |
| C5                                 | 20.587 | 11.668 | 20.482 |
| C6                                 | 21.146 | 12.936 | 20.303 |
| C7                                 | 21.613 | 13.370 | 19.054 |
| C8                                 | 21.553 | 12.453 | 17.994 |
| C9                                 | 20.962 | 11.209 | 18.156 |
| C10                                | 17.883 | 7.903  | 21.167 |
| C11                                | 16.801 | 7.831  | 22.036 |
| C12                                | 16.138 | 8.986  | 22.484 |
| C13                                | 16.637 | 10.219 | 22.053 |
| C14                                | 17.722 | 10.299 | 21.173 |
| C15                                | 20.973 | 6.657  | 19.921 |
| C16                                | 21.895 | 5.827  | 20.551 |
| C17                                | 22.851 | 6.346  | 21.446 |
| C18                                | 22.824 | 7.733  | 21.679 |
| C19                                | 21.893 | 8.564  | 21.059 |
| C20                                | 14.900 | 8.854  | 23.339 |
| C21                                | 22.176 | 14.761 | 18.830 |
| C22                                | 23.865 | 5.525  | 22.114 |
| C23                                | 13.649 | 8.500  | 22.501 |
| C24                                | 24.048 | 4.196  | 22.010 |
| C25                                | 21.687 | 15.471 | 17.547 |
| H26                                | 20.239 | 11.376 | 21.475 |
| H27                                | 21.203 | 13.615 | 21.156 |
| H28                                | 21.929 | 12.723 | 17.009 |
| H29                                | 20.853 | 10.551 | 17.291 |
| H30                                | 18.369 | 6.980  | 20.850 |
| H31                                | 16.458 | 6.851  | 22.369 |
| H32                                | 16.173 | 11.142 | 22.404 |
| H33                                | 18.071 | 11.282 | 20.861 |
| H34                                | 20.264 | 6.225  | 19.210 |
| H35                                | 21.878 | 4.762  | 20.330 |
| H36                                | 23.558 | 8.165  | 22.362 |
| H37                                | 21.927 | 9.635  | 21.268 |
| H38                                | 14.723 | 9.780  | 23.907 |
| H39                                | 23.273 | 14.668 | 18.767 |
| H40                                | 12.919 | 7.976  | 23.137 |
| H41                                | 13.957 | 7.775  | 21.734 |
| H42                                | 24.849 | 3.701  | 22.556 |

|     |        |        |        |
|-----|--------|--------|--------|
| H43 | 23.420 | 3.563  | 21.383 |
| H44 | 21.567 | 14.724 | 16.749 |
| H45 | 22.483 | 16.145 | 17.196 |
| P46 | 17.160 | 10.111 | 16.691 |
| C47 | 17.594 | 11.859 | 17.060 |
| C48 | 15.559 | 9.898  | 17.625 |
| C49 | 16.654 | 10.183 | 14.893 |
| C50 | 17.511 | 9.649  | 13.919 |
| C51 | 17.184 | 9.683  | 12.572 |
| C52 | 15.960 | 10.232 | 12.134 |
| C53 | 15.110 | 10.773 | 13.118 |
| C54 | 15.453 | 10.771 | 14.463 |
| C55 | 15.285 | 8.640  | 18.179 |
| C56 | 14.185 | 8.449  | 19.017 |
| C57 | 13.343 | 9.516  | 19.357 |
| C58 | 13.577 | 10.756 | 18.742 |
| C59 | 14.660 | 10.949 | 17.887 |
| C60 | 17.439 | 12.333 | 18.371 |
| C61 | 17.937 | 13.573 | 18.748 |
| C62 | 18.618 | 14.396 | 17.840 |
| C63 | 18.733 | 13.941 | 16.520 |
| C64 | 18.243 | 12.688 | 16.132 |
| C65 | 12.318 | 9.406  | 20.460 |
| C66 | 15.545 | 10.265 | 10.727 |
| C67 | 19.179 | 15.709 | 18.348 |
| C68 | 12.961 | 9.709  | 21.840 |
| C69 | 20.405 | 16.318 | 17.652 |
| C70 | 16.185 | 9.725  | 9.677  |
| H71 | 18.473 | 9.208  | 14.226 |
| H72 | 17.885 | 9.281  | 11.849 |
| H73 | 14.168 | 11.220 | 12.815 |
| H74 | 14.770 | 11.232 | 15.189 |
| H75 | 15.981 | 7.818  | 17.994 |
| H76 | 14.014 | 7.464  | 19.449 |
| H77 | 12.917 | 11.596 | 18.961 |
| H78 | 14.838 | 11.944 | 17.477 |
| H79 | 16.929 | 11.715 | 19.107 |
| H80 | 17.810 | 13.905 | 19.781 |
| H81 | 19.229 | 14.559 | 15.771 |
| H82 | 18.388 | 12.353 | 15.104 |
| H83 | 11.861 | 8.405  | 20.474 |
| H84 | 14.606 | 10.797 | 10.548 |
| H85 | 19.407 | 15.573 | 19.418 |
| H86 | 12.193 | 10.099 | 22.525 |

|                                    |        |         |         |         |
|------------------------------------|--------|---------|---------|---------|
| H87                                | 13.689 | 10.523  | 21.700  |         |
| H88                                | 20.641 | 17.246  | 18.198  |         |
| H89                                | 20.130 | 16.641  | 16.635  |         |
| H90                                | 17.121 | 9.172   | 9.779   |         |
| H91                                | 15.777 | 9.819   | 8.672   |         |
| H92                                | 15.066 | 8.059   | 24.082  |         |
| H93                                | 21.979 | 15.383  | 19.716  |         |
| H94                                | 11.507 | 10.125  | 20.273  |         |
| H95                                | 18.377 | 16.468  | 18.323  |         |
| H96                                | 24.541 | 6.088   | 22.763  |         |
| C97                                | 18.118 | 7.130   | 16.005  |         |
| O98                                | 17.814 | 6.235   | 15.311  |         |
| Rh99                               | 18.889 | 8.340   | 17.164  |         |
| C100                               | 22.345 | 7.097   | 14.376  |         |
| C101                               | 22.443 | 8.334   | 15.277  |         |
| H102                               | 21.630 | 6.362   | 14.767  |         |
| H103                               | 23.328 | 6.617   | 14.304  |         |
| H104                               | 22.786 | 8.054   | 16.280  |         |
| H105                               | 23.124 | 9.084   | 14.850  |         |
| H106                               | 22.024 | 7.381   | 13.365  |         |
| C107                               | 21.092 | 8.972   | 15.444  |         |
| O108                               | 20.767 | 9.965   | 14.823  |         |
| H109                               | 18.726 | 7.047   | 18.078  |         |
| H110                               | 20.384 | 7.838   | 16.574  |         |
| <b>R4 (FS) Crosslinking mode 1</b> |        |         |         |         |
| ATOM                               | X      | Y       | Z       |         |
| P                                  | 1      | 19.6327 | 9.0769  | 19.4063 |
| C                                  | 2      | 20.9394 | 8.0023  | 20.1708 |
| C                                  | 3      | 18.3446 | 9.0873  | 20.7340 |
| C                                  | 4      | 20.4217 | 10.7349 | 19.3546 |
| C                                  | 5      | 20.6302 | 11.6216 | 20.4247 |
| C                                  | 6      | 21.1919 | 12.8829 | 20.2025 |
| C                                  | 7      | 21.5868 | 13.2950 | 18.9208 |
| C                                  | 8      | 21.4416 | 12.3744 | 17.8738 |
| C                                  | 9      | 20.8512 | 11.1334 | 18.0792 |
| C                                  | 10     | 17.8493 | 7.8421  | 21.1618 |
| C                                  | 11     | 16.7709 | 7.7644  | 22.0366 |
| C                                  | 12     | 16.1346 | 8.9192  | 22.5241 |
| C                                  | 13     | 16.6570 | 10.1560 | 22.1298 |
| C                                  | 14     | 17.7430 | 10.2425 | 21.2520 |
| C                                  | 15     | 20.9958 | 6.6311  | 19.8697 |
| C                                  | 16     | 21.9444 | 5.7999  | 20.4565 |
| C                                  | 17     | 22.8897 | 6.3074  | 21.3670 |
| C                                  | 18     | 22.8281 | 7.6819  | 21.6639 |

|   |    |         |         |         |
|---|----|---------|---------|---------|
| C | 19 | 21.8736 | 8.5141  | 21.0838 |
| C | 20 | 14.8892 | 8.7917  | 23.3701 |
| C | 21 | 22.1762 | 14.6706 | 18.6681 |
| C | 22 | 23.9337 | 5.4907  | 21.9940 |
| C | 23 | 13.6341 | 8.4902  | 22.5154 |
| C | 24 | 24.1616 | 4.1760  | 21.8243 |
| C | 25 | 21.6772 | 15.3919 | 17.3951 |
| H | 26 | 20.3311 | 11.3480 | 21.4367 |
| H | 27 | 21.3083 | 13.5672 | 21.0459 |
| H | 28 | 21.7524 | 12.6353 | 16.8625 |
| H | 29 | 20.6845 | 10.4726 | 17.2270 |
| H | 30 | 18.3016 | 6.9212  | 20.7939 |
| H | 31 | 16.4080 | 6.7808  | 22.3426 |
| H | 32 | 16.2106 | 11.0760 | 22.5121 |
| H | 33 | 18.1095 | 11.2261 | 20.9666 |
| H | 34 | 20.2944 | 6.2234  | 19.1404 |
| H | 35 | 21.9564 | 4.7439  | 20.1871 |
| H | 36 | 23.5518 | 8.1042  | 22.3640 |
| H | 37 | 21.8777 | 9.5731  | 21.3350 |
| H | 38 | 14.7287 | 9.7067  | 23.9603 |
| H | 39 | 23.2689 | 14.5489 | 18.5805 |
| H | 40 | 12.8806 | 7.9847  | 23.1397 |
| H | 41 | 13.9256 | 7.7631  | 21.7438 |
| H | 42 | 24.9827 | 3.6816  | 22.3419 |
| H | 43 | 23.5492 | 3.5518  | 21.1726 |
| H | 44 | 21.4755 | 14.6444 | 16.6150 |
| H | 45 | 22.4974 | 16.0101 | 16.9991 |
| P | 46 | 17.1896 | 10.1349 | 16.7284 |
| C | 47 | 17.6150 | 11.9036 | 17.0501 |
| C | 48 | 15.5965 | 9.9379  | 17.6312 |
| C | 49 | 16.7566 | 10.1440 | 14.9413 |
| C | 50 | 17.7990 | 10.0485 | 13.9984 |
| C | 51 | 17.5236 | 10.0500 | 12.6364 |
| C | 52 | 16.2006 | 10.1240 | 12.1574 |
| C | 53 | 15.1681 | 10.2072 | 13.1092 |
| C | 54 | 15.4375 | 10.2192 | 14.4771 |
| C | 55 | 15.3272 | 8.6839  | 18.2009 |
| C | 56 | 14.2270 | 8.5022  | 19.0393 |
| C | 57 | 13.3922 | 9.5775  | 19.3758 |
| C | 58 | 13.6284 | 10.8128 | 18.7517 |
| C | 59 | 14.7043 | 10.9925 | 17.8829 |
| C | 60 | 17.5589 | 12.3502 | 18.3792 |
| C | 61 | 18.0497 | 13.5992 | 18.7346 |
| C | 62 | 18.6204 | 14.4607 | 17.7864 |

|    |     |         |         |         |
|----|-----|---------|---------|---------|
| C  | 63  | 18.6138 | 14.0425 | 16.4493 |
| C  | 64  | 18.1263 | 12.7813 | 16.0838 |
| C  | 65  | 12.3600 | 9.4716  | 20.4727 |
| C  | 66  | 15.8623 | 10.1152 | 10.7306 |
| C  | 67  | 19.2124 | 15.7704 | 18.2628 |
| C  | 68  | 12.9951 | 9.7303  | 21.8636 |
| C  | 69  | 20.4539 | 16.3152 | 17.5380 |
| C  | 70  | 16.7053 | 9.9909  | 9.6906  |
| H  | 71  | 18.8360 | 9.9764  | 14.3351 |
| H  | 72  | 18.3546 | 9.9858  | 11.9343 |
| H  | 73  | 14.1326 | 10.2536 | 12.7661 |
| H  | 74  | 14.6120 | 10.2746 | 15.1865 |
| H  | 75  | 16.0201 | 7.8596  | 18.0156 |
| H  | 76  | 14.0480 | 7.5183  | 19.4746 |
| H  | 77  | 12.9745 | 11.6587 | 18.9741 |
| H  | 78  | 14.8765 | 11.9723 | 17.4365 |
| H  | 79  | 17.1376 | 11.7018 | 19.1448 |
| H  | 80  | 18.0234 | 13.9064 | 19.7821 |
| H  | 81  | 19.0171 | 14.6937 | 15.6717 |
| H  | 82  | 18.1629 | 12.4796 | 15.0373 |
| H  | 83  | 11.8783 | 8.4814  | 20.4634 |
| H  | 84  | 14.7945 | 10.2189 | 10.5161 |
| H  | 85  | 19.4436 | 15.6557 | 19.3335 |
| H  | 86  | 12.2302 | 10.1349 | 22.5448 |
| H  | 87  | 13.7507 | 10.5227 | 21.7465 |
| H  | 88  | 20.7579 | 17.2282 | 18.0769 |
| H  | 89  | 20.1726 | 16.6543 | 16.5282 |
| H  | 90  | 17.7828 | 9.8750  | 9.8163  |
| H  | 91  | 16.3318 | 9.9973  | 8.6670  |
| H  | 92  | 15.0314 | 7.9731  | 24.0924 |
| H  | 93  | 22.0201 | 15.3040 | 19.5554 |
| H  | 94  | 11.5665 | 10.2122 | 20.2933 |
| H  | 95  | 18.4345 | 16.5520 | 18.2186 |
| H  | 96  | 24.5958 | 6.0452  | 22.6658 |
| C  | 97  | 18.1654 | 7.2251  | 15.9431 |
| O  | 98  | 17.8640 | 6.4243  | 15.1528 |
| Rh | 99  | 18.7113 | 8.3642  | 17.3215 |
| C  | 100 | 22.9615 | 7.0281  | 14.1024 |
| C  | 101 | 23.0515 | 8.2947  | 14.9702 |
| H  | 102 | 22.2437 | 6.3061  | 14.5161 |
| H  | 103 | 23.9406 | 6.5357  | 14.0401 |
| H  | 104 | 23.3923 | 8.0158  | 15.9812 |
| H  | 105 | 23.7610 | 9.0193  | 14.5477 |
| H  | 106 | 22.6415 | 7.2787  | 13.0819 |

|   |     |         |         |         |
|---|-----|---------|---------|---------|
| C | 107 | 21.7054 | 8.9542  | 15.1056 |
| O | 108 | 21.4215 | 10.0460 | 14.6293 |
| H | 109 | 19.6701 | 7.1069  | 17.5874 |
| H | 110 | 20.9328 | 8.3765  | 15.6795 |

**R1m (IS) Crosslinking mode 2**

| ATOM | X  | Y       | Z       |         |
|------|----|---------|---------|---------|
| P    | 1  | 22.4785 | 7.8570  | 19.2585 |
| C    | 2  | 23.2090 | 6.1924  | 19.5747 |
| C    | 3  | 21.0375 | 7.8685  | 20.4164 |
| C    | 4  | 23.6090 | 9.0347  | 20.1229 |
| C    | 5  | 23.6585 | 9.1309  | 21.5233 |
| C    | 6  | 24.5275 | 10.0313 | 22.1365 |
| C    | 7  | 25.3686 | 10.8729 | 21.3836 |
| C    | 8  | 25.3036 | 10.7746 | 19.9806 |
| C    | 9  | 24.4390 | 9.8765  | 19.3643 |
| C    | 10 | 20.6764 | 6.7692  | 21.2082 |
| C    | 11 | 19.5738 | 6.8402  | 22.0604 |
| C    | 12 | 18.7985 | 8.0047  | 22.1536 |
| C    | 13 | 19.1731 | 9.1038  | 21.3694 |
| C    | 14 | 20.2680 | 9.0379  | 20.5098 |
| C    | 15 | 22.6166 | 5.0941  | 18.9215 |
| C    | 16 | 23.1239 | 3.8106  | 19.0756 |
| C    | 17 | 24.2630 | 3.5678  | 19.8701 |
| C    | 18 | 24.8511 | 4.6702  | 20.5152 |
| C    | 19 | 24.3373 | 5.9595  | 20.3723 |
| C    | 20 | 17.6210 | 8.0663  | 23.0973 |
| C    | 21 | 26.2518 | 11.8073 | 22.0889 |
| C    | 22 | 24.8587 | 2.2381  | 20.0368 |
| C    | 23 | 16.3778 | 7.2436  | 22.6905 |
| C    | 24 | 24.5299 | 1.1065  | 19.3905 |
| C    | 25 | 27.1096 | 12.6925 | 21.5485 |
| H    | 26 | 23.0103 | 8.5068  | 22.1389 |
| H    | 27 | 24.5527 | 10.0963 | 23.2259 |
| H    | 28 | 25.9321 | 11.4114 | 19.3587 |
| H    | 29 | 24.3821 | 9.8185  | 18.2767 |
| H    | 30 | 21.2640 | 5.8524  | 21.1694 |
| H    | 31 | 19.3215 | 5.9724  | 22.6740 |
| H    | 32 | 18.5960 | 10.0281 | 21.4324 |
| H    | 33 | 20.5262 | 9.9091  | 19.9061 |
| H    | 34 | 21.7471 | 5.2511  | 18.2815 |
| H    | 35 | 22.6316 | 2.9809  | 18.5679 |
| H    | 36 | 25.7387 | 4.5125  | 21.1306 |
| H    | 37 | 24.8282 | 6.7916  | 20.8760 |
| H    | 38 | 17.3244 | 9.1155  | 23.2496 |

|   |    |         |         |         |
|---|----|---------|---------|---------|
| H | 39 | 15.8046 | 7.0572  | 23.6106 |
| H | 40 | 16.7013 | 6.2508  | 22.3391 |
| H | 41 | 25.0584 | 0.1757  | 19.5939 |
| H | 42 | 23.7471 | 1.0690  | 18.6319 |
| H | 43 | 27.2351 | 12.8071 | 20.4709 |
| H | 44 | 27.7211 | 13.3331 | 22.1826 |
| P | 45 | 20.0877 | 8.9603  | 16.5249 |
| C | 46 | 19.8482 | 10.7685 | 16.2537 |
| C | 47 | 18.6865 | 8.5274  | 17.6423 |
| C | 48 | 19.4987 | 8.1715  | 14.9577 |
| C | 49 | 20.4308 | 7.7095  | 14.0118 |
| C | 50 | 20.0159 | 7.0970  | 12.8340 |
| C | 51 | 18.6488 | 6.9090  | 12.5525 |
| C | 52 | 17.7209 | 7.3756  | 13.5018 |
| C | 53 | 18.1333 | 7.9841  | 14.6853 |
| C | 54 | 18.6027 | 7.2053  | 18.1032 |
| C | 55 | 17.5572 | 6.8045  | 18.9332 |
| C | 56 | 16.5678 | 7.7096  | 19.3433 |
| C | 57 | 16.6565 | 9.0292  | 18.8777 |
| C | 58 | 17.6997 | 9.4389  | 18.0464 |
| C | 59 | 20.6096 | 11.6423 | 17.0452 |
| C | 60 | 20.4659 | 13.0223 | 16.9206 |
| C | 61 | 19.5781 | 13.5834 | 15.9850 |
| C | 62 | 18.8291 | 12.6997 | 15.1833 |
| C | 63 | 18.9609 | 11.3190 | 15.3142 |
| C | 64 | 15.4243 | 7.2888  | 20.2349 |
| C | 65 | 18.1574 | 6.2486  | 11.3387 |
| C | 66 | 19.4804 | 15.0438 | 15.8859 |
| C | 67 | 15.4230 | 7.8890  | 21.6577 |
| C | 68 | 18.8411 | 15.7574 | 14.9430 |
| C | 69 | 18.8875 | 5.6278  | 10.3959 |
| H | 70 | 21.4955 | 7.8297  | 14.2151 |
| H | 71 | 20.7683 | 6.7597  | 12.1213 |
| H | 72 | 16.6539 | 7.2405  | 13.3130 |
| H | 73 | 17.3847 | 8.3044  | 15.4101 |
| H | 74 | 19.3581 | 6.4781  | 17.8005 |
| H | 75 | 17.5156 | 5.7694  | 19.2774 |
| H | 76 | 15.8962 | 9.7562  | 19.1723 |
| H | 77 | 17.7360 | 10.4728 | 17.7024 |
| H | 78 | 21.3364 | 11.2312 | 17.7489 |
| H | 79 | 21.0698 | 13.6813 | 17.5466 |
| H | 80 | 18.1244 | 13.0935 | 14.4505 |
| H | 81 | 18.3667 | 10.6658 | 14.6752 |
| H | 82 | 15.3929 | 6.1906  | 20.3058 |

|                                     |        |         |           |         |        |
|-------------------------------------|--------|---------|-----------|---------|--------|
| H                                   | 83     | 17.0706 | 6.2687    | 11.2180 |        |
| H                                   | 84     | 20.0049 | 15.5868   | 16.6772 |        |
| H                                   | 85     | 14.3947 | 7.8048    | 22.0408 |        |
| H                                   | 86     | 15.6222 | 8.9706    | 21.5901 |        |
| H                                   | 87     | 18.8349 | 16.8463   | 14.9770 |        |
| H                                   | 88     | 18.3195 | 15.2901   | 14.1068 |        |
| H                                   | 89     | 19.9740 | 5.5499    | 10.4494 |        |
| H                                   | 90     | 18.4069 | 5.1687    | 9.5329  |        |
| H                                   | 91     | 17.9577 | 7.7012    | 24.0809 |        |
| H                                   | 92     | 26.1873 | 11.7555   | 23.1796 |        |
| H                                   | 93     | 14.4832 | 7.5888    | 19.7455 |        |
| H                                   | 94     | 25.6718 | 2.1947    | 20.7670 |        |
| C                                   | 95     | 20.5111 | 4.1543    | 16.0541 |        |
| O                                   | 96     | 20.3992 | 3.2421    | 15.3758 |        |
| Rh                                  | 97     | 22.3550 | 8.4105    | 16.9627 |        |
| C                                   | 98     | 24.2385 | 6.4180    | 15.8508 |        |
| C                                   | 99     | 24.3556 | 7.5980    | 16.8122 |        |
| H                                   | 100    | 23.5103 | 5.6702    | 16.1996 |        |
| H                                   | 101    | 25.2056 | 5.8924    | 15.7472 |        |
| H                                   | 102    | 24.7393 | 7.2604    | 17.7844 |        |
| H                                   | 103    | 25.0757 | 8.3355    | 16.4305 |        |
| H                                   | 104    | 23.9318 | 6.7352    | 14.8431 |        |
| C                                   | 105    | 22.9598 | 9.5546    | 15.6113 |        |
| O                                   | 106    | 23.4312 | 10.3656   | 14.9158 |        |
| <b>R1m (TS) Crosslinking mode 2</b> |        |         |           |         |        |
| ATOM                                | X      | Y       | Z         |         |        |
| 1                                   | File 1 | by      | GaussView | 6.0.16  |        |
| 1                                   | P      | 1       | 22.466    | 7.805   | 19.312 |
| 2                                   | C      | 2       | 23.328    | 6.213   | 19.688 |
| 3                                   | C      | 3       | 20.958    | 7.662   | 20.372 |
| 4                                   | C      | 4       | 23.402    | 9.076   | 20.284 |
| 5                                   | C      | 5       | 23.290    | 9.177   | 21.680 |
| 6                                   | C      | 6       | 23.976    | 10.172  | 22.374 |
| 7                                   | C      | 7       | 24.794    | 11.105  | 21.710 |
| 8                                   | C      | 8       | 24.900    | 10.996  | 20.311 |
| 9                                   | C      | 9       | 24.217    | 10.005  | 19.615 |
| 10                                  | C      | 10      | 20.628    | 6.518   | 21.112 |
| 11                                  | C      | 11      | 19.474    | 6.488   | 21.897 |
| 12                                  | C      | 12      | 18.611    | 7.590   | 21.969 |
| 13                                  | C      | 13      | 18.951    | 8.733   | 21.233 |
| 14                                  | C      | 14      | 20.099    | 8.769   | 20.444 |
| 15                                  | C      | 15      | 22.972    | 5.094   | 18.914 |
| 16                                  | C      | 16      | 23.569    | 3.856   | 19.120 |
| 17                                  | C      | 17      | 24.565    | 3.686   | 20.101 |

|    |   |    |        |        |        |
|----|---|----|--------|--------|--------|
| 18 | C | 18 | 24.923 | 4.811  | 20.862 |
| 19 | C | 19 | 24.319 | 6.054  | 20.664 |
| 20 | C | 20 | 17.377 | 7.548  | 22.840 |
| 21 | C | 21 | 25.482 | 12.136 | 22.497 |
| 22 | C | 22 | 25.244 | 2.408  | 20.346 |
| 23 | C | 23 | 16.244 | 6.601  | 22.388 |
| 24 | C | 24 | 25.062 | 1.250  | 19.691 |
| 25 | C | 25 | 26.249 | 13.137 | 22.034 |
| 26 | H | 26 | 22.646 | 8.491  | 22.232 |
| 27 | H | 27 | 23.869 | 10.237 | 23.459 |
| 28 | H | 28 | 25.521 | 11.695 | 19.751 |
| 29 | H | 29 | 24.289 | 9.947  | 18.529 |
| 30 | H | 30 | 21.282 | 5.647  | 21.090 |
| 31 | H | 31 | 19.250 | 5.588  | 22.473 |
| 32 | H | 32 | 18.303 | 9.610  | 21.275 |
| 33 | H | 33 | 20.328 | 9.674  | 19.879 |
| 34 | H | 34 | 22.224 | 5.199  | 18.126 |
| 35 | H | 35 | 23.266 | 3.014  | 18.499 |
| 36 | H | 36 | 25.700 | 4.714  | 21.623 |
| 37 | H | 37 | 24.631 | 6.903  | 21.270 |
| 38 | H | 38 | 16.971 | 8.566  | 22.947 |
| 39 | H | 39 | 15.625 | 6.409  | 23.278 |
| 40 | H | 40 | 16.673 | 5.624  | 22.111 |
| 41 | H | 41 | 25.634 | 0.361  | 19.956 |
| 42 | H | 42 | 24.351 | 1.145  | 18.871 |
| 43 | H | 43 | 26.440 | 13.290 | 20.971 |
| 44 | H | 44 | 26.707 | 13.848 | 22.721 |
| 45 | P | 45 | 20.174 | 8.855  | 16.512 |
| 46 | C | 46 | 19.770 | 10.650 | 16.388 |
| 47 | C | 47 | 18.760 | 8.199  | 17.497 |
| 48 | C | 48 | 19.742 | 8.254  | 14.813 |
| 49 | C | 49 | 20.582 | 8.587  | 13.732 |
| 50 | C | 50 | 20.292 | 8.169  | 12.440 |
| 51 | C | 51 | 19.155 | 7.384  | 12.162 |
| 52 | C | 52 | 18.326 | 7.048  | 13.246 |
| 53 | C | 53 | 18.607 | 7.476  | 14.544 |
| 54 | C | 54 | 18.825 | 6.873  | 17.950 |
| 55 | C | 55 | 17.785 | 6.324  | 18.701 |
| 56 | C | 56 | 16.658 | 7.083  | 19.041 |
| 57 | C | 57 | 16.597 | 8.406  | 18.581 |
| 58 | C | 58 | 17.627 | 8.959  | 17.822 |
| 59 | C | 59 | 20.368 | 11.543 | 17.289 |
| 60 | C | 60 | 20.044 | 12.898 | 17.265 |
| 61 | C | 61 | 19.131 | 13.418 | 16.330 |

|     |    |     |        |        |        |
|-----|----|-----|--------|--------|--------|
| 62  | C  | 62  | 18.550 | 12.518 | 15.417 |
| 63  | C  | 63  | 18.862 | 11.163 | 15.446 |
| 64  | C  | 64  | 15.525 | 6.502  | 19.853 |
| 65  | C  | 65  | 18.808 | 6.909  | 10.819 |
| 66  | C  | 66  | 18.840 | 14.856 | 16.338 |
| 67  | C  | 67  | 15.309 | 7.100  | 21.262 |
| 68  | C  | 68  | 18.073 | 15.537 | 15.469 |
| 69  | C  | 69  | 19.494 | 7.099  | 9.680  |
| 70  | H  | 70  | 21.479 | 9.180  | 13.907 |
| 71  | H  | 71  | 20.966 | 8.457  | 11.633 |
| 72  | H  | 72  | 17.435 | 6.444  | 13.066 |
| 73  | H  | 73  | 17.930 | 7.201  | 15.352 |
| 74  | H  | 74  | 19.703 | 6.268  | 17.721 |
| 75  | H  | 75  | 17.857 | 5.290  | 19.043 |
| 76  | H  | 76  | 15.723 | 9.018  | 18.815 |
| 77  | H  | 77  | 17.549 | 9.992  | 17.483 |
| 78  | H  | 78  | 21.108 | 11.171 | 18.001 |
| 79  | H  | 79  | 20.519 | 13.576 | 17.977 |
| 80  | H  | 80  | 17.838 | 12.879 | 14.675 |
| 81  | H  | 81  | 18.396 | 10.491 | 14.724 |
| 82  | H  | 82  | 15.656 | 5.413  | 19.943 |
| 83  | H  | 83  | 17.877 | 6.338  | 10.766 |
| 84  | H  | 84  | 19.318 | 15.412 | 17.150 |
| 85  | H  | 85  | 14.276 | 6.856  | 21.550 |
| 86  | H  | 86  | 15.349 | 8.200  | 21.201 |
| 87  | H  | 87  | 17.933 | 16.612 | 15.576 |
| 88  | H  | 88  | 17.573 | 15.059 | 14.626 |
| 89  | H  | 89  | 20.435 | 7.651  | 9.641  |
| 90  | H  | 90  | 19.128 | 6.696  | 8.736  |
| 91  | H  | 91  | 17.687 | 7.236  | 23.850 |
| 92  | H  | 92  | 25.335 | 12.057 | 23.578 |
| 93  | H  | 93  | 14.593 | 6.650  | 19.284 |
| 94  | H  | 94  | 25.984 | 2.432  | 21.151 |
| 95  | C  | 95  | 21.408 | 5.339  | 15.425 |
| 96  | O  | 96  | 21.567 | 5.084  | 14.323 |
| 97  | Rh | 97  | 22.437 | 8.401  | 17.044 |
| 98  | C  | 98  | 24.671 | 6.691  | 16.008 |
| 99  | C  | 99  | 24.527 | 7.809  | 17.038 |
| 100 | H  | 100 | 24.069 | 5.808  | 16.269 |
| 101 | H  | 101 | 25.720 | 6.348  | 15.946 |
| 102 | H  | 102 | 24.861 | 7.459  | 18.025 |
| 103 | H  | 103 | 25.183 | 8.650  | 16.771 |
| 104 | H  | 104 | 24.370 | 7.015  | 15.002 |
| 105 | C  | 105 | 23.049 | 9.732  | 15.884 |

|                                     |    |         |         |         |        |
|-------------------------------------|----|---------|---------|---------|--------|
| 106                                 | O  | 106     | 23.514  | 10.665  | 15.352 |
| <b>R1m (FS) Crosslinking mode 2</b> |    |         |         |         |        |
| <b>R2 (IS) Crosslinking mode 2</b>  |    |         |         |         |        |
| ATOM                                |    | X       | Y       | Z       |        |
| P                                   | 1  | 22.2638 | 7.6244  | 19.2708 |        |
| C                                   | 2  | 23.4087 | 6.2809  | 19.8575 |        |
| C                                   | 3  | 20.8361 | 7.4332  | 20.4268 |        |
| C                                   | 4  | 23.1998 | 9.0789  | 19.9198 |        |
| C                                   | 5  | 23.0344 | 9.6480  | 21.1914 |        |
| C                                   | 6  | 23.9441 | 10.5934 | 21.6690 |        |
| C                                   | 7  | 25.0591 | 10.9942 | 20.9108 |        |
| C                                   | 8  | 25.1968 | 10.4445 | 19.6212 |        |
| C                                   | 9  | 24.2845 | 9.5189  | 19.1364 |        |
| C                                   | 10 | 20.4912 | 6.1762  | 20.9511 |        |
| C                                   | 11 | 19.3669 | 6.0257  | 21.7636 |        |
| C                                   | 12 | 18.5568 | 7.1166  | 22.1112 |        |
| C                                   | 13 | 18.9031 | 8.3697  | 21.5837 |        |
| C                                   | 14 | 20.0043 | 8.5221  | 20.7386 |        |
| C                                   | 15 | 23.3695 | 4.9893  | 19.2976 |        |
| C                                   | 16 | 24.2754 | 4.0052  | 19.6922 |        |
| C                                   | 17 | 25.2715 | 4.2709  | 20.6529 |        |
| C                                   | 18 | 25.2779 | 5.5496  | 21.2359 |        |
| C                                   | 19 | 24.3743 | 6.5322  | 20.8458 |        |
| C                                   | 20 | 17.3526 | 6.9072  | 23.0023 |        |
| C                                   | 21 | 26.0292 | 11.9320 | 21.4852 |        |
| C                                   | 22 | 26.3063 | 3.3143  | 21.0570 |        |
| C                                   | 23 | 16.0416 | 6.6033  | 22.2367 |        |
| C                                   | 24 | 26.6249 | 2.1479  | 20.4704 |        |
| C                                   | 25 | 27.2103 | 12.2993 | 20.9576 |        |
| H                                   | 26 | 22.2189 | 9.3230  | 21.8366 |        |
| H                                   | 27 | 23.8058 | 11.0099 | 22.6688 |        |
| H                                   | 28 | 26.0288 | 10.7435 | 18.9847 |        |
| H                                   | 29 | 24.4285 | 9.1016  | 18.1414 |        |
| H                                   | 30 | 21.1109 | 5.3051  | 20.7406 |        |
| H                                   | 31 | 19.1276 | 5.0355  | 22.1585 |        |
| H                                   | 32 | 18.3013 | 9.2466  | 21.8269 |        |
| H                                   | 33 | 20.2218 | 9.5104  | 20.3322 |        |
| H                                   | 34 | 22.6263 | 4.7499  | 18.5364 |        |
| H                                   | 35 | 24.2150 | 3.0175  | 19.2347 |        |
| H                                   | 36 | 26.0246 | 5.7876  | 21.9959 |        |
| H                                   | 37 | 24.4380 | 7.5118  | 21.3139 |        |
| H                                   | 38 | 17.2000 | 7.7866  | 23.6473 |        |
| H                                   | 39 | 15.3882 | 6.0055  | 22.8894 |        |
| H                                   | 40 | 16.2877 | 5.9513  | 21.3860 |        |

|   |    |         |         |         |
|---|----|---------|---------|---------|
| H | 41 | 27.4334 | 1.5331  | 20.8654 |
| H | 42 | 26.1148 | 1.7759  | 19.5810 |
| H | 43 | 27.5684 | 11.9251 | 19.9978 |
| H | 44 | 27.8649 | 12.9916 | 21.4859 |
| P | 45 | 19.7115 | 8.8139  | 16.6097 |
| C | 46 | 19.8893 | 10.6387 | 16.4583 |
| C | 47 | 18.2767 | 8.5794  | 17.7319 |
| C | 48 | 18.9852 | 8.3101  | 14.9874 |
| C | 49 | 19.8493 | 8.0063  | 13.9198 |
| C | 50 | 19.3535 | 7.5492  | 12.7066 |
| C | 51 | 17.9718 | 7.3595  | 12.5082 |
| C | 52 | 17.1102 | 7.7085  | 13.5644 |
| C | 53 | 17.6033 | 8.1759  | 14.7823 |
| C | 54 | 17.9245 | 7.2653  | 18.0739 |
| C | 55 | 16.7913 | 7.0111  | 18.8429 |
| C | 56 | 15.9983 | 8.0610  | 19.3317 |
| C | 57 | 16.3631 | 9.3722  | 18.9934 |
| C | 58 | 17.4792 | 9.6354  | 18.1963 |
| C | 59 | 20.5849 | 11.3470 | 17.4522 |
| C | 60 | 20.8572 | 12.7030 | 17.2971 |
| C | 61 | 20.4766 | 13.4004 | 16.1344 |
| C | 62 | 19.7481 | 12.6916 | 15.1609 |
| C | 63 | 19.4589 | 11.3401 | 15.3191 |
| C | 64 | 14.8382 | 7.8134  | 20.2624 |
| C | 65 | 17.4179 | 6.7975  | 11.2727 |
| C | 66 | 20.8912 | 14.7963 | 15.9599 |
| C | 67 | 15.2597 | 7.8452  | 21.7491 |
| C | 68 | 20.8711 | 15.5048 | 14.8168 |
| C | 69 | 18.1057 | 6.1777  | 10.2966 |
| H | 70 | 20.9261 | 8.1026  | 14.0631 |
| H | 71 | 20.0533 | 7.3243  | 11.9019 |
| H | 72 | 16.0327 | 7.5878  | 13.4353 |
| H | 73 | 16.9050 | 8.4177  | 15.5830 |
| H | 74 | 18.5345 | 6.4306  | 17.7283 |
| H | 75 | 16.5255 | 5.9791  | 19.0745 |
| H | 76 | 15.7557 | 10.2060 | 19.3531 |
| H | 77 | 17.7296 | 10.6636 | 17.9348 |
| H | 78 | 20.9638 | 10.8263 | 18.3332 |
| H | 79 | 21.4174 | 13.2276 | 18.0729 |
| H | 80 | 19.4069 | 13.2005 | 14.2593 |
| H | 81 | 18.9122 | 10.8168 | 14.5354 |
| H | 82 | 14.3624 | 6.8469  | 20.0339 |
| H | 83 | 16.3317 | 6.8774  | 11.1722 |
| H | 84 | 21.3012 | 15.2730 | 16.8545 |

|                                     |     |         |         |         |
|-------------------------------------|-----|---------|---------|---------|
| H                                   | 85  | 14.3545 | 7.9697  | 22.3628 |
| H                                   | 86  | 15.8570 | 8.7553  | 21.9104 |
| H                                   | 87  | 21.2296 | 16.5333 | 14.7907 |
| H                                   | 88  | 20.5216 | 15.0846 | 13.8730 |
| H                                   | 89  | 19.1860 | 6.0356  | 10.3468 |
| H                                   | 90  | 17.5998 | 5.7753  | 9.4197  |
| H                                   | 91  | 17.5686 | 6.0636  | 23.6747 |
| H                                   | 92  | 25.7506 | 12.3390 | 22.4615 |
| H                                   | 93  | 14.0726 | 8.5873  | 20.0967 |
| H                                   | 94  | 26.8935 | 3.6258  | 21.9261 |
| C                                   | 95  | 21.0524 | 5.9727  | 16.4530 |
| O                                   | 96  | 20.6548 | 4.9073  | 16.1910 |
| Rh                                  | 97  | 21.8097 | 7.6774  | 16.8918 |
| C                                   | 98  | 23.9029 | 6.5641  | 14.8357 |
| C                                   | 99  | 23.7078 | 6.6902  | 16.3419 |
| H                                   | 100 | 23.0700 | 6.0266  | 14.3610 |
| H                                   | 101 | 24.8292 | 6.0070  | 14.6080 |
| H                                   | 102 | 23.6965 | 5.7007  | 16.8105 |
| H                                   | 103 | 24.5319 | 7.2496  | 16.8045 |
| H                                   | 104 | 23.9809 | 7.5425  | 14.3409 |
| C                                   | 105 | 22.7182 | 9.1813  | 16.1416 |
| O                                   | 106 | 23.3396 | 10.0526 | 15.6787 |
| <b>R1s (IS) Crosslinking mode 2</b> |     |         |         |         |
| ATOM                                | X   | Y       | Z       |         |
| P                                   | 1   | 22.3001 | 7.5059  | 19.2568 |
| C                                   | 2   | 23.2662 | 6.0674  | 19.9068 |
| C                                   | 3   | 20.8720 | 7.5641  | 20.4270 |
| C                                   | 4   | 23.3106 | 8.9535  | 19.8213 |
| C                                   | 5   | 23.1882 | 9.5432  | 21.0896 |
| C                                   | 6   | 23.9666 | 10.6459 | 21.4371 |
| C                                   | 7   | 24.9031 | 11.1981 | 20.5445 |
| C                                   | 8   | 25.0240 | 10.5983 | 19.2754 |
| C                                   | 9   | 24.2420 | 9.5050  | 18.9221 |
| C                                   | 10  | 20.5247 | 6.4631  | 21.2234 |
| C                                   | 11  | 19.4307 | 6.5268  | 22.0866 |
| C                                   | 12  | 18.6530 | 7.6886  | 22.1974 |
| C                                   | 13  | 19.0018 | 8.7845  | 21.3958 |
| C                                   | 14  | 20.0801 | 8.7208  | 20.5135 |
| C                                   | 15  | 23.0491 | 4.7999  | 19.3380 |
| C                                   | 16  | 23.7807 | 3.6926  | 19.7502 |
| C                                   | 17  | 24.7726 | 3.8097  | 20.7437 |
| C                                   | 18  | 24.9743 | 5.0784  | 21.3145 |
| C                                   | 19  | 24.2356 | 6.1900  | 20.9098 |
| C                                   | 20  | 17.5022 | 7.7411  | 23.1740 |



|   |    |         |         |         |
|---|----|---------|---------|---------|
| C | 21 | 25.6977 | 12.3557 | 20.9666 |
| C | 22 | 25.6113 | 2.6901  | 21.1847 |
| C | 23 | 16.1923 | 7.0690  | 22.7001 |
| C | 24 | 25.5945 | 1.4264  | 20.7268 |
| C | 25 | 26.6644 | 12.9863 | 20.2750 |
| H | 26 | 22.4685 | 9.1504  | 21.8076 |
| H | 27 | 23.8498 | 11.0941 | 22.4257 |
| H | 28 | 25.7342 | 10.9935 | 18.5495 |
| H | 29 | 24.3447 | 9.0744  | 17.9258 |
| H | 30 | 21.1245 | 5.5541  | 21.1858 |
| H | 31 | 19.1937 | 5.6591  | 22.7062 |
| H | 32 | 18.4218 | 9.7068  | 21.4639 |
| H | 33 | 20.3144 | 9.5941  | 19.9034 |
| H | 34 | 22.3174 | 4.7060  | 18.5331 |
| H | 35 | 23.5929 | 2.7301  | 19.2748 |
| H | 36 | 25.7393 | 5.1946  | 22.0850 |
| H | 37 | 24.4356 | 7.1584  | 21.3671 |
| H | 38 | 17.2899 | 8.7870  | 23.4443 |
| H | 39 | 15.6226 | 6.7953  | 23.6009 |
| H | 40 | 16.4405 | 6.1171  | 22.2046 |
| H | 41 | 26.2830 | 0.6803  | 21.1224 |
| H | 42 | 24.9053 | 1.0918  | 19.9506 |
| H | 43 | 26.9724 | 12.6785 | 19.2752 |
| H | 44 | 27.1849 | 13.8400 | 20.7076 |
| P | 45 | 19.8367 | 8.3454  | 16.5900 |
| C | 46 | 20.0565 | 10.1769 | 16.4833 |
| C | 47 | 18.3881 | 8.1192  | 17.7007 |
| C | 48 | 19.1033 | 7.9970  | 14.9306 |
| C | 49 | 19.9466 | 8.0465  | 13.8044 |
| C | 50 | 19.4503 | 7.8248  | 12.5273 |
| C | 51 | 18.0882 | 7.5276  | 12.3150 |
| C | 52 | 17.2571 | 7.4647  | 13.4462 |
| C | 53 | 17.7507 | 7.6945  | 14.7316 |
| C | 54 | 18.2021 | 6.8500  | 18.2664 |
| C | 55 | 17.1152 | 6.5958  | 19.1032 |
| C | 56 | 16.1947 | 7.6052  | 19.4162 |
| C | 57 | 16.3883 | 8.8727  | 18.8474 |
| C | 58 | 17.4646 | 9.1322  | 18.0007 |
| C | 59 | 21.0723 | 10.7970 | 17.2261 |
| C | 60 | 21.2547 | 12.1778 | 17.1762 |
| C | 61 | 20.4418 | 12.9954 | 16.3709 |
| C | 62 | 19.4321 | 12.3648 | 15.6163 |
| C | 63 | 19.2478 | 10.9881 | 15.6651 |
| C | 64 | 15.0434 | 7.3748  | 20.3630 |

|                                     |     |         |         |         |
|-------------------------------------|-----|---------|---------|---------|
| C                                   | 65  | 17.5122 | 7.2940  | 10.9867 |
| C                                   | 66  | 20.6720 | 14.4443 | 16.3525 |
| C                                   | 67  | 15.2773 | 7.9228  | 21.7883 |
| C                                   | 68  | 20.0567 | 15.3537 | 15.5774 |
| C                                   | 69  | 18.1586 | 7.2682  | 9.8086  |
| H                                   | 70  | 21.0089 | 8.2592  | 13.9383 |
| H                                   | 71  | 20.1331 | 7.8854  | 11.6802 |
| H                                   | 72  | 16.1991 | 7.2292  | 13.3148 |
| H                                   | 73  | 17.0723 | 7.6348  | 15.5820 |
| H                                   | 74  | 18.9248 | 6.0598  | 18.0546 |
| H                                   | 75  | 16.9894 | 5.5996  | 19.5307 |
| H                                   | 76  | 15.6811 | 9.6744  | 19.0730 |
| H                                   | 77  | 17.5870 | 10.1292 | 17.5777 |
| H                                   | 78  | 21.7327 | 10.1917 | 17.8468 |
| H                                   | 79  | 22.0561 | 12.6309 | 17.7629 |
| H                                   | 80  | 18.7794 | 12.9620 | 14.9798 |
| H                                   | 81  | 18.4664 | 10.5344 | 15.0549 |
| H                                   | 82  | 14.8103 | 6.3004  | 20.4201 |
| H                                   | 83  | 16.4320 | 7.1237  | 10.9836 |
| H                                   | 84  | 21.4350 | 14.7937 | 17.0537 |
| H                                   | 85  | 14.2930 | 8.0201  | 22.2704 |
| H                                   | 86  | 15.6730 | 8.9481  | 21.7121 |
| H                                   | 87  | 20.3103 | 16.4108 | 15.6486 |
| H                                   | 88  | 19.2956 | 15.0807 | 14.8454 |
| H                                   | 89  | 19.2351 | 7.4210  | 9.7224  |
| H                                   | 90  | 17.6157 | 7.0855  | 8.8820  |
| H                                   | 91  | 17.8236 | 7.2438  | 24.1027 |
| H                                   | 92  | 25.4552 | 12.7292 | 21.9660 |
| H                                   | 93  | 14.1495 | 7.8649  | 19.9465 |
| H                                   | 94  | 26.3362 | 2.9469  | 21.9627 |
| C                                   | 95  | 21.5166 | 5.8329  | 15.7423 |
| O                                   | 96  | 21.2772 | 4.8401  | 15.1743 |
| Rh                                  | 97  | 21.8816 | 7.2038  | 16.9643 |
| C                                   | 98  | 24.4796 | 7.3689  | 15.5402 |
| C                                   | 99  | 23.9367 | 6.5896  | 16.7361 |
| H                                   | 100 | 23.9841 | 7.0779  | 14.6024 |
| H                                   | 101 | 25.5642 | 7.1964  | 15.4071 |
| H                                   | 102 | 24.0265 | 5.5072  | 16.5685 |
| H                                   | 103 | 24.5221 | 6.8009  | 17.6420 |
| H                                   | 104 | 24.3482 | 8.4583  | 15.6483 |
| H                                   | 105 | 24.9834 | 11.8484 | 15.8821 |
| H                                   | 106 | 24.2333 | 11.8079 | 15.9265 |
| <b>R1s (TS) Crosslinking mode 2</b> |     |         |         |         |
| ATOM                                | X   | Y       | Z       |         |

|   |    |        |        |        |
|---|----|--------|--------|--------|
| P | 1  | 22.356 | 7.704  | 19.248 |
| C | 2  | 23.399 | 6.259  | 19.830 |
| C | 3  | 20.890 | 7.520  | 20.404 |
| C | 4  | 23.284 | 9.099  | 20.022 |
| C | 5  | 23.174 | 9.478  | 21.373 |
| C | 6  | 24.028 | 10.448 | 21.886 |
| C | 7  | 25.003 | 11.083 | 21.096 |
| C | 8  | 25.051 | 10.750 | 19.727 |
| C | 9  | 24.226 | 9.757  | 19.215 |
| C | 10 | 20.531 | 6.291  | 20.993 |
| C | 11 | 19.422 | 6.195  | 21.840 |
| C | 12 | 18.648 | 7.320  | 22.160 |
| C | 13 | 19.014 | 8.545  | 21.581 |
| C | 14 | 20.104 | 8.640  | 20.714 |
| C | 15 | 23.215 | 4.978  | 19.261 |
| C | 16 | 24.002 | 3.894  | 19.642 |
| C | 17 | 25.029 | 4.039  | 20.593 |
| C | 18 | 25.183 | 5.305  | 21.186 |
| C | 19 | 24.389 | 6.389  | 20.813 |
| C | 20 | 17.453 | 7.176  | 23.079 |
| C | 21 | 25.927 | 12.041 | 21.721 |
| C | 22 | 25.936 | 2.953  | 20.985 |
| C | 23 | 16.148 | 6.754  | 22.361 |
| C | 24 | 25.950 | 1.690  | 20.522 |
| C | 25 | 27.033 | 12.572 | 21.171 |
| H | 26 | 22.453 | 8.969  | 22.019 |
| H | 27 | 23.951 | 10.698 | 22.941 |
| H | 28 | 25.753 | 11.247 | 19.060 |
| H | 29 | 24.326 | 9.466  | 18.162 |
| H | 30 | 21.123 | 5.386  | 20.811 |
| H | 31 | 19.164 | 5.228  | 22.278 |
| H | 32 | 18.439 | 9.445  | 21.804 |
| H | 33 | 20.348 | 9.622  | 20.283 |
| H | 34 | 22.464 | 4.841  | 18.483 |
| H | 35 | 23.862 | 2.938  | 19.139 |
| H | 36 | 25.972 | 5.446  | 21.928 |
| H | 37 | 24.574 | 7.353  | 21.289 |
| H | 38 | 17.281 | 8.112  | 23.631 |
| H | 39 | 15.505 | 6.241  | 23.093 |
| H | 40 | 16.404 | 5.992  | 21.609 |
| H | 41 | 26.666 | 0.960  | 20.900 |
| H | 42 | 25.260 | 1.338  | 19.756 |
| H | 43 | 27.369 | 12.324 | 20.163 |
| H | 44 | 27.645 | 13.281 | 21.728 |

|   |    |        |        |        |
|---|----|--------|--------|--------|
| P | 45 | 19.882 | 8.794  | 16.544 |
| C | 46 | 19.962 | 10.634 | 16.401 |
| C | 47 | 18.471 | 8.545  | 17.695 |
| C | 48 | 19.098 | 8.266  | 14.937 |
| C | 49 | 19.903 | 7.987  | 13.817 |
| C | 50 | 19.357 | 7.550  | 12.620 |
| C | 51 | 17.965 | 7.353  | 12.489 |
| C | 52 | 17.163 | 7.640  | 13.608 |
| C | 53 | 17.707 | 8.095  | 14.806 |
| C | 54 | 18.178 | 7.226  | 18.087 |
| C | 55 | 17.054 | 6.948  | 18.860 |
| C | 56 | 16.209 | 7.978  | 19.303 |
| C | 57 | 16.518 | 9.293  | 18.925 |
| C | 58 | 17.623 | 9.575  | 18.121 |
| C | 59 | 20.773 | 11.363 | 17.289 |
| C | 60 | 20.889 | 12.747 | 17.167 |
| C | 61 | 20.285 | 13.435 | 16.098 |
| C | 62 | 19.437 | 12.706 | 15.242 |
| C | 63 | 19.283 | 11.330 | 15.388 |
| C | 64 | 15.026 | 7.716  | 20.205 |
| C | 65 | 17.336 | 6.867  | 11.255 |
| C | 66 | 20.532 | 14.874 | 15.948 |
| C | 67 | 15.348 | 7.905  | 21.704 |
| C | 68 | 20.149 | 15.671 | 14.934 |
| C | 69 | 17.959 | 6.365  | 10.173 |
| H | 70 | 20.993 | 8.081  | 13.891 |
| H | 71 | 20.016 | 7.377  | 11.768 |
| H | 72 | 16.082 | 7.511  | 13.531 |
| H | 73 | 17.046 | 8.290  | 15.656 |
| H | 74 | 18.831 | 6.410  | 17.767 |
| H | 75 | 16.833 | 5.914  | 19.128 |
| H | 76 | 15.871 | 10.108 | 19.256 |
| H | 77 | 17.812 | 10.612 | 17.824 |
| H | 78 | 21.346 | 10.843 | 18.055 |
| H | 79 | 21.549 | 13.288 | 17.847 |
| H | 80 | 18.932 | 13.207 | 14.415 |
| H | 81 | 18.659 | 10.786 | 14.683 |
| H | 82 | 14.639 | 6.699  | 20.037 |
| H | 83 | 16.242 | 6.909  | 11.252 |
| H | 84 | 21.064 | 15.331 | 16.783 |
| H | 85 | 14.399 | 8.039  | 22.247 |
| H | 86 | 15.886 | 8.859  | 21.823 |
| H | 87 | 20.359 | 16.740 | 14.963 |
| H | 88 | 19.620 | 15.294 | 14.057 |

|                                     |     |         |         |         |
|-------------------------------------|-----|---------|---------|---------|
| H                                   | 89  | 19.043  | 6.271   | 10.105  |
| H                                   | 90  | 17.392  | 6.018   | 9.310   |
| H                                   | 91  | 17.696  | 6.415   | 23.836  |
| H                                   | 92  | 25.665  | 12.320  | 22.748  |
| H                                   | 93  | 14.212  | 8.408   | 19.934  |
| H                                   | 94  | 26.668  | 3.228   | 21.750  |
| C                                   | 95  | 21.514  | 6.090   | 16.151  |
| O                                   | 96  | 21.155  | 4.987   | 15.941  |
| Rh                                  | 97  | 22.073  | 7.712   | 16.888  |
| C                                   | 98  | 24.517  | 6.809   | 15.120  |
| C                                   | 99  | 24.115  | 6.995   | 16.592  |
| H                                   | 100 | 23.826  | 6.139   | 14.592  |
| H                                   | 101 | 25.503  | 6.323   | 15.083  |
| H                                   | 102 | 24.176  | 6.038   | 17.144  |
| H                                   | 103 | 24.788  | 7.705   | 17.096  |
| H                                   | 104 | 24.580  | 7.765   | 14.544  |
| H                                   | 105 | 22.657  | 9.095   | 15.482  |
| H                                   | 106 | 22.915  | 9.490   | 16.145  |
| <b>R1s (FS) Crosslinking mode 2</b> |     |         |         |         |
| ATOM                                | X   | Y       | Z       |         |
| P                                   | 1   | 22.3203 | 7.6300  | 19.2680 |
| C                                   | 2   | 23.4016 | 6.2211  | 19.8168 |
| C                                   | 3   | 20.8859 | 7.4735  | 20.4252 |
| C                                   | 4   | 23.2494 | 9.0609  | 19.9853 |
| C                                   | 5   | 23.1905 | 9.4037  | 21.3471 |
| C                                   | 6   | 24.0609 | 10.3545 | 21.8785 |
| C                                   | 7   | 25.0357 | 10.9877 | 21.0844 |
| C                                   | 8   | 25.0570 | 10.6724 | 19.7126 |
| C                                   | 9   | 24.1787 | 9.7375  | 19.1766 |
| C                                   | 10  | 20.5093 | 6.2376  | 20.9734 |
| C                                   | 11  | 19.3971 | 6.1405  | 21.8095 |
| C                                   | 12  | 18.6279 | 7.2624  | 22.1467 |
| C                                   | 13  | 19.0071 | 8.4950  | 21.5945 |
| C                                   | 14  | 20.1026 | 8.5965  | 20.7355 |
| C                                   | 15  | 23.2267 | 4.9502  | 19.2396 |
| C                                   | 16  | 24.0197 | 3.8693  | 19.6113 |
| C                                   | 17  | 25.0400 | 4.0163  | 20.5705 |
| C                                   | 18  | 25.2109 | 5.2881  | 21.1410 |
| C                                   | 19  | 24.4137 | 6.3708  | 20.7747 |
| C                                   | 20  | 17.4295 | 7.1048  | 23.0532 |
| C                                   | 21  | 25.9827 | 11.9162 | 21.7113 |
| C                                   | 22  | 25.9371 | 2.9299  | 20.9798 |
| C                                   | 23  | 16.1248 | 6.7360  | 22.3073 |
| C                                   | 24  | 25.9438 | 1.6637  | 20.5307 |

|   |    |         |         |         |
|---|----|---------|---------|---------|
| C | 25 | 27.1082 | 12.4113 | 21.1674 |
| H | 26 | 22.4757 | 8.9093  | 22.0047 |
| H | 27 | 24.0045 | 10.5950 | 22.9418 |
| H | 28 | 25.7658 | 11.1699 | 19.0504 |
| H | 29 | 24.2079 | 9.5153  | 18.1107 |
| H | 30 | 21.0986 | 5.3439  | 20.7708 |
| H | 31 | 19.1345 | 5.1664  | 22.2289 |
| H | 32 | 18.4370 | 9.3947  | 21.8324 |
| H | 33 | 20.3596 | 9.5723  | 20.3205 |
| H | 34 | 22.4644 | 4.8083  | 18.4735 |
| H | 35 | 23.8547 | 2.9058  | 19.1301 |
| H | 36 | 25.9991 | 5.4346  | 21.8823 |
| H | 37 | 24.5954 | 7.3372  | 21.2397 |
| H | 38 | 17.2687 | 8.0234  | 23.6379 |
| H | 39 | 15.4631 | 6.2044  | 23.0080 |
| H | 40 | 16.3769 | 6.0050  | 21.5240 |
| H | 41 | 26.6695 | 0.9430  | 20.9060 |
| H | 42 | 25.2374 | 1.3023  | 19.7828 |
| H | 43 | 27.4342 | 12.1509 | 20.1596 |
| H | 44 | 27.7549 | 13.0771 | 21.7378 |
| P | 45 | 19.8723 | 8.7926  | 16.5159 |
| C | 46 | 19.9829 | 10.6213 | 16.3109 |
| C | 47 | 18.4592 | 8.5733  | 17.6781 |
| C | 48 | 19.0718 | 8.2386  | 14.9341 |
| C | 49 | 19.8643 | 7.9151  | 13.8189 |
| C | 50 | 19.2995 | 7.4466  | 12.6391 |
| C | 51 | 17.9075 | 7.2709  | 12.5194 |
| C | 52 | 17.1152 | 7.6288  | 13.6234 |
| C | 53 | 17.6794 | 8.1007  | 14.8085 |
| C | 54 | 18.1365 | 7.2616  | 18.0588 |
| C | 55 | 17.0119 | 7.0009  | 18.8392 |
| C | 56 | 16.1926 | 8.0443  | 19.2956 |
| C | 57 | 16.5368 | 9.3550  | 18.9344 |
| C | 58 | 17.6472 | 9.6229  | 18.1308 |
| C | 59 | 20.7775 | 11.3646 | 17.1980 |
| C | 60 | 20.9036 | 12.7444 | 17.0538 |
| C | 61 | 20.2713 | 13.4322 | 16.0013 |
| C | 62 | 19.4691 | 12.6810 | 15.1225 |
| C | 63 | 19.3258 | 11.3040 | 15.2747 |
| C | 64 | 15.0096 | 7.7953  | 20.1985 |
| C | 65 | 17.2676 | 6.7191  | 11.3206 |
| C | 66 | 20.4926 | 14.8753 | 15.8562 |
| C | 67 | 15.3535 | 7.9305  | 21.6978 |
| C | 68 | 20.1546 | 15.6474 | 14.8081 |

|                                    |     |         |         |         |
|------------------------------------|-----|---------|---------|---------|
| C                                  | 69  | 17.8775 | 6.1147  | 10.2851 |
| H                                  | 70  | 20.9466 | 8.0157  | 13.8894 |
| H                                  | 71  | 19.9528 | 7.2087  | 11.8001 |
| H                                  | 72  | 16.0312 | 7.5153  | 13.5582 |
| H                                  | 73  | 17.0261 | 8.3463  | 15.6443 |
| H                                  | 74  | 18.7647 | 6.4335  | 17.7287 |
| H                                  | 75  | 16.7664 | 5.9694  | 19.0956 |
| H                                  | 76  | 15.9117 | 10.1844 | 19.2735 |
| H                                  | 77  | 17.8737 | 10.6502 | 17.8453 |
| H                                  | 78  | 21.3202 | 10.8553 | 17.9947 |
| H                                  | 79  | 21.5314 | 13.3025 | 17.7507 |
| H                                  | 80  | 18.9514 | 13.1776 | 14.3018 |
| H                                  | 81  | 18.7035 | 10.7507 | 14.5719 |
| H                                  | 82  | 14.5885 | 6.7958  | 20.0072 |
| H                                  | 83  | 16.1768 | 6.7983  | 11.3032 |
| H                                  | 84  | 21.0064 | 15.3466 | 16.6987 |
| H                                  | 85  | 14.4165 | 8.0766  | 22.2561 |
| H                                  | 86  | 15.9288 | 8.8590  | 21.8337 |
| H                                  | 87  | 20.3748 | 16.7141 | 14.8058 |
| H                                  | 88  | 19.6656 | 15.2443 | 13.9204 |
| H                                  | 89  | 18.9582 | 5.9733  | 10.2445 |
| H                                  | 90  | 17.3017 | 5.7271  | 9.4453  |
| H                                  | 91  | 17.6536 | 6.3099  | 23.7808 |
| H                                  | 92  | 25.7393 | 12.1932 | 22.7408 |
| H                                  | 93  | 14.2185 | 8.5201  | 19.9517 |
| H                                  | 94  | 26.6802 | 3.2168  | 21.7295 |
| C                                  | 95  | 21.3617 | 5.9329  | 16.4185 |
| O                                  | 96  | 21.0590 | 4.8844  | 16.0164 |
| Rh                                 | 97  | 21.9680 | 7.7132  | 16.8713 |
| C                                  | 98  | 24.3710 | 6.7498  | 15.0745 |
| C                                  | 99  | 24.0277 | 7.0638  | 16.5280 |
| H                                  | 100 | 23.7100 | 5.9786  | 14.6516 |
| H                                  | 101 | 25.4083 | 6.3767  | 14.9872 |
| H                                  | 102 | 24.1886 | 6.1736  | 17.1498 |
| H                                  | 103 | 24.6997 | 7.8446  | 16.9065 |
| H                                  | 104 | 24.2842 | 7.6395  | 14.4342 |
| H                                  | 105 | 22.1490 | 8.0925  | 15.3514 |
| H                                  | 106 | 22.6468 | 9.1630  | 16.8781 |
| <b>R2 (TS) Crosslinking mode 2</b> |     |         |         |         |
| ATOM                               | X   | Y       | Z       |         |
| P                                  | 1   | 22.630  | 7.808   | 19.355  |
| C                                  | 2   | 23.473  | 6.208   | 19.703  |
| C                                  | 3   | 21.303  | 7.869   | 20.640  |
| C                                  | 4   | 23.829  | 9.050   | 20.026  |

|   |    |        |        |        |
|---|----|--------|--------|--------|
| C | 5  | 23.854 | 9.422  | 21.379 |
| C | 6  | 24.789 | 10.344 | 21.843 |
| C | 7  | 25.738 | 10.924 | 20.980 |
| C | 8  | 25.705 | 10.546 | 19.625 |
| C | 9  | 24.764 | 9.636  | 19.155 |
| C | 10 | 21.129 | 6.890  | 21.626 |
| C | 11 | 20.093 | 6.996  | 22.555 |
| C | 12 | 19.214 | 8.088  | 22.551 |
| C | 13 | 19.415 | 9.083  | 21.584 |
| C | 14 | 20.428 | 8.968  | 20.634 |
| C | 15 | 22.776 | 5.002  | 19.477 |
| C | 16 | 23.387 | 3.771  | 19.684 |
| C | 17 | 24.728 | 3.687  | 20.111 |
| C | 18 | 25.417 | 4.893  | 20.323 |
| C | 19 | 24.807 | 6.132  | 20.127 |
| C | 20 | 18.049 | 8.114  | 23.512 |
| C | 21 | 26.704 | 11.885 | 21.527 |
| C | 22 | 25.424 | 2.416  | 20.342 |
| C | 23 | 16.775 | 7.457  | 22.922 |
| C | 24 | 24.932 | 1.174  | 20.192 |
| C | 25 | 27.670 | 12.544 | 20.862 |
| H | 26 | 23.134 | 8.994  | 22.076 |
| H | 27 | 24.788 | 10.627 | 22.897 |
| H | 28 | 26.420 | 10.972 | 18.921 |
| H | 29 | 24.735 | 9.375  | 18.096 |
| H | 30 | 21.806 | 6.039  | 21.680 |
| H | 31 | 19.975 | 6.214  | 23.308 |
| H | 32 | 18.756 | 9.952  | 21.554 |
| H | 33 | 20.532 | 9.743  | 19.873 |
| H | 34 | 21.742 | 5.030  | 19.133 |
| H | 35 | 22.813 | 2.862  | 19.505 |
| H | 36 | 26.456 | 4.859  | 20.657 |
| H | 37 | 25.374 | 7.043  | 20.311 |
| H | 38 | 17.822 | 9.147  | 23.820 |
| H | 39 | 16.199 | 7.007  | 23.745 |
| H | 40 | 17.092 | 6.618  | 22.284 |
| H | 41 | 25.551 | 0.300  | 20.393 |
| H | 42 | 23.907 | 0.979  | 19.873 |
| H | 43 | 27.832 | 12.424 | 19.790 |
| H | 44 | 28.333 | 13.233 | 21.384 |
| P | 45 | 19.797 | 8.793  | 16.488 |
| C | 46 | 19.709 | 10.613 | 16.210 |
| C | 47 | 18.438 | 8.519  | 17.709 |
| C | 48 | 19.111 | 8.119  | 14.920 |

|   |    |        |        |        |
|---|----|--------|--------|--------|
| C | 49 | 19.855 | 8.302  | 13.737 |
| C | 50 | 19.392 | 7.813  | 12.523 |
| C | 51 | 18.178 | 7.102  | 12.438 |
| C | 52 | 17.457 | 6.903  | 13.629 |
| C | 53 | 17.910 | 7.405  | 14.849 |
| C | 54 | 18.291 | 7.255  | 18.306 |
| C | 55 | 17.297 | 7.032  | 19.262 |
| C | 56 | 16.435 | 8.059  | 19.671 |
| C | 57 | 16.590 | 9.317  | 19.072 |
| C | 58 | 17.568 | 9.547  | 18.105 |
| C | 59 | 20.536 | 11.444 | 16.979 |
| C | 60 | 20.472 | 12.829 | 16.846 |
| C | 61 | 19.589 | 13.436 | 15.934 |
| C | 62 | 18.777 | 12.594 | 15.151 |
| C | 63 | 18.834 | 11.210 | 15.286 |
| C | 64 | 15.393 | 7.872  | 20.749 |
| C | 65 | 17.644 | 6.565  | 11.183 |
| C | 66 | 19.554 | 14.900 | 15.846 |
| C | 67 | 15.851 | 8.407  | 22.126 |
| C | 68 | 18.785 | 15.659 | 15.043 |
| C | 69 | 18.149 | 6.709  | 9.945  |
| H | 70 | 20.807 | 8.832  | 13.776 |
| H | 71 | 19.989 | 7.977  | 11.625 |
| H | 72 | 16.516 | 6.350  | 13.592 |
| H | 73 | 17.319 | 7.242  | 15.749 |
| H | 74 | 18.962 | 6.446  | 18.017 |
| H | 75 | 17.200 | 6.039  | 19.703 |
| H | 76 | 15.925 | 10.135 | 19.360 |
| H | 77 | 17.649 | 10.537 | 17.658 |
| H | 78 | 21.243 | 11.002 | 17.685 |
| H | 79 | 21.119 | 13.459 | 17.459 |
| H | 80 | 18.083 | 13.023 | 14.428 |
| H | 81 | 18.190 | 10.584 | 14.669 |
| H | 82 | 15.118 | 6.809  | 20.837 |
| H | 83 | 16.722 | 5.987  | 11.296 |
| H | 84 | 20.243 | 15.412 | 16.525 |
| H | 85 | 14.959 | 8.631  | 22.730 |
| H | 86 | 16.353 | 9.374  | 21.964 |
| H | 87 | 18.856 | 16.745 | 15.077 |
| H | 88 | 18.073 | 15.237 | 14.332 |
| H | 89 | 19.060 | 7.274  | 9.744  |
| H | 90 | 17.655 | 6.256  | 9.086  |
| H | 91 | 18.339 | 7.573  | 24.426 |
| H | 92 | 26.607 | 12.064 | 22.602 |

|                                    |     |         |         |         |
|------------------------------------|-----|---------|---------|---------|
| H                                  | 93  | 14.479  | 8.408   | 20.451  |
| H                                  | 94  | 26.462  | 2.520   | 20.668  |
| C                                  | 95  | 21.653  | 6.346   | 16.629  |
| O                                  | 96  | 20.650  | 5.658   | 16.627  |
| Rh                                 | 97  | 21.950  | 8.236   | 17.115  |
| C                                  | 98  | 22.893  | 5.445   | 14.619  |
| C                                  | 99  | 22.996  | 5.784   | 16.109  |
| H                                  | 100 | 22.053  | 4.762   | 14.434  |
| H                                  | 101 | 23.821  | 4.966   | 14.277  |
| H                                  | 102 | 23.179  | 4.876   | 16.702  |
| H                                  | 103 | 23.830  | 6.469   | 16.299  |
| H                                  | 104 | 22.737  | 6.351   | 14.019  |
| C                                  | 105 | 23.115  | 9.072   | 15.743  |
| O                                  | 106 | 23.679  | 9.105   | 14.719  |
| <b>R2 (FS) Crosslinking mode 2</b> |     |         |         |         |
| ATOM                               | X   | Y       | Z       |         |
| P                                  | 1   | 22.4248 | 7.7942  | 19.5120 |
| C                                  | 2   | 23.4532 | 6.3830  | 20.1003 |
| C                                  | 3   | 21.0003 | 7.7903  | 20.6798 |
| C                                  | 4   | 23.4042 | 9.2632  | 20.0437 |
| C                                  | 5   | 23.0874 | 10.0386 | 21.1688 |
| C                                  | 6   | 23.8663 | 11.1444 | 21.5085 |
| C                                  | 7   | 24.9898 | 11.5163 | 20.7497 |
| C                                  | 8   | 25.3012 | 10.7302 | 19.6222 |
| C                                  | 9   | 24.5244 | 9.6333  | 19.2736 |
| C                                  | 10  | 20.8162 | 6.7846  | 21.6391 |
| C                                  | 11  | 19.6859 | 6.7849  | 22.4573 |
| C                                  | 12  | 18.7113 | 7.7880  | 22.3621 |
| C                                  | 13  | 18.9130 | 8.8044  | 21.4158 |
| C                                  | 14  | 20.0269 | 8.7991  | 20.5780 |
| C                                  | 15  | 23.2621 | 5.1218  | 19.5072 |
| C                                  | 16  | 24.0264 | 4.0268  | 19.8894 |
| C                                  | 17  | 25.0286 | 4.1522  | 20.8719 |
| C                                  | 18  | 25.2087 | 5.4161  | 21.4617 |
| C                                  | 19  | 24.4362 | 6.5154  | 21.0899 |
| C                                  | 20  | 17.4647 | 7.7127  | 23.2138 |
| C                                  | 21  | 25.7768 | 12.6853 | 21.1552 |
| C                                  | 22  | 25.8930 | 3.0429  | 21.2883 |
| C                                  | 23  | 16.2956 | 6.9740  | 22.5138 |
| C                                  | 24  | 25.8766 | 1.7784  | 20.8328 |
| C                                  | 25  | 26.8775 | 13.1785 | 20.5616 |
| H                                  | 26  | 22.2294 | 9.7797  | 21.7881 |
| H                                  | 27  | 23.6053 | 11.7311 | 22.3915 |
| H                                  | 28  | 26.1637 | 10.9781 | 19.0040 |

|   |    |         |         |         |
|---|----|---------|---------|---------|
| H | 29 | 24.7910 | 9.0558  | 18.3897 |
| H | 30 | 21.5568 | 5.9925  | 21.7464 |
| H | 31 | 19.5636 | 5.9858  | 23.1919 |
| H | 32 | 18.1829 | 9.6093  | 21.3216 |
| H | 33 | 20.1338 | 9.5916  | 19.8358 |
| H | 34 | 22.5105 | 5.0108  | 18.7223 |
| H | 35 | 23.8545 | 3.0678  | 19.4014 |
| H | 36 | 25.9797 | 5.5361  | 22.2255 |
| H | 37 | 24.6081 | 7.4803  | 21.5665 |
| H | 38 | 17.1389 | 8.7212  | 23.5114 |
| H | 39 | 15.6845 | 6.4785  | 23.2833 |
| H | 40 | 16.7245 | 6.1638  | 21.9050 |
| H | 41 | 26.5823 | 1.0401  | 21.2118 |
| H | 42 | 25.1712 | 1.4354  | 20.0751 |
| H | 43 | 27.3199 | 12.7311 | 19.6712 |
| H | 44 | 27.3784 | 14.0564 | 20.9685 |
| P | 45 | 19.9422 | 8.4339  | 16.5824 |
| C | 46 | 20.1139 | 10.2708 | 16.5516 |
| C | 47 | 18.4374 | 8.1295  | 17.6124 |
| C | 48 | 19.3156 | 8.1134  | 14.8787 |
| C | 49 | 20.0335 | 8.6314  | 13.7821 |
| C | 50 | 19.6211 | 8.3919  | 12.4784 |
| C | 51 | 18.4845 | 7.6029  | 12.2053 |
| C | 52 | 17.7822 | 7.0787  | 13.3052 |
| C | 53 | 18.1831 | 7.3305  | 14.6181 |
| C | 54 | 18.2847 | 6.8586  | 18.1869 |
| C | 55 | 17.1808 | 6.5686  | 18.9921 |
| C | 56 | 16.2130 | 7.5430  | 19.2704 |
| C | 57 | 16.3686 | 8.8078  | 18.6830 |
| C | 58 | 17.4580 | 9.1016  | 17.8656 |
| C | 59 | 21.1471 | 10.8891 | 17.2696 |
| C | 60 | 21.3014 | 12.2740 | 17.2499 |
| C | 61 | 20.4436 | 13.0976 | 16.4985 |
| C | 62 | 19.4145 | 12.4694 | 15.7691 |
| C | 63 | 19.2556 | 11.0895 | 15.7906 |
| C | 64 | 15.0770 | 7.3011  | 20.2342 |
| C | 65 | 18.0137 | 7.3081  | 10.8485 |
| C | 66 | 20.6577 | 14.5487 | 16.5012 |
| C | 67 | 15.3760 | 7.8613  | 21.6441 |
| C | 68 | 19.9273 | 15.4836 | 15.8690 |
| C | 69 | 18.6055 | 7.6411  | 9.6886  |
| H | 70 | 20.9261 | 9.2332  | 13.9582 |
| H | 71 | 20.1893 | 8.8292  | 11.6570 |
| H | 72 | 16.8951 | 6.4682  | 13.1269 |

|                                    |     |         |         |         |
|------------------------------------|-----|---------|---------|---------|
| H                                  | 73  | 17.6046 | 6.9155  | 15.4433 |
| H                                  | 74  | 19.0388 | 6.0912  | 18.0020 |
| H                                  | 75  | 17.0850 | 5.5709  | 19.4241 |
| H                                  | 76  | 15.6250 | 9.5845  | 18.8794 |
| H                                  | 77  | 17.5465 | 10.0992 | 17.4369 |
| H                                  | 78  | 21.8492 | 10.2771 | 17.8368 |
| H                                  | 79  | 22.1195 | 12.7274 | 17.8126 |
| H                                  | 80  | 18.7366 | 13.0688 | 15.1614 |
| H                                  | 81  | 18.4628 | 10.6378 | 15.1940 |
| H                                  | 82  | 14.8525 | 6.2257  | 20.3029 |
| H                                  | 83  | 17.0752 | 6.7476  | 10.8028 |
| H                                  | 84  | 21.5147 | 14.8799 | 17.0944 |
| H                                  | 85  | 14.4233 | 8.0181  | 22.1725 |
| H                                  | 86  | 15.8183 | 8.8623  | 21.5246 |
| H                                  | 87  | 20.1886 | 16.5386 | 15.9460 |
| H                                  | 88  | 19.0548 | 15.2415 | 15.2610 |
| H                                  | 89  | 19.5480 | 8.1885  | 9.6429  |
| H                                  | 90  | 18.1564 | 7.3652  | 8.7351  |
| H                                  | 91  | 17.7123 | 7.1788  | 24.1433 |
| H                                  | 92  | 25.4029 | 13.1947 | 22.0484 |
| H                                  | 93  | 14.1703 | 7.7879  | 19.8430 |
| H                                  | 94  | 26.6334 | 3.3076  | 22.0490 |
| C                                  | 95  | 21.6164 | 5.7385  | 15.9942 |
| O                                  | 96  | 20.7312 | 5.0754  | 16.5288 |
| Rh                                 | 97  | 21.9852 | 7.3350  | 17.1548 |
| C                                  | 98  | 22.5270 | 6.1121  | 13.6217 |
| C                                  | 99  | 22.4295 | 5.1881  | 14.8341 |
| H                                  | 100 | 21.5534 | 6.2209  | 13.1283 |
| H                                  | 101 | 23.2402 | 5.7047  | 12.8923 |
| H                                  | 102 | 21.9997 | 4.2133  | 14.5584 |
| H                                  | 103 | 23.4367 | 5.0078  | 15.2433 |
| H                                  | 104 | 22.8724 | 7.1121  | 13.9149 |
| C                                  | 105 | 23.7436 | 7.5078  | 16.5560 |
| O                                  | 106 | 24.7992 | 7.7873  | 16.1281 |
| <b>R3 (IS) Crosslinking mode 2</b> |     |         |         |         |
| ATOM                               | X   | Y       | Z       |         |
| P                                  | 1   | 22.3728 | 7.7347  | 19.5130 |
| C                                  | 2   | 23.4043 | 6.3409  | 20.1367 |
| C                                  | 3   | 20.9590 | 7.7613  | 20.6941 |
| C                                  | 4   | 23.3660 | 9.2093  | 20.0044 |
| C                                  | 5   | 23.0570 | 10.0117 | 21.1126 |
| C                                  | 6   | 23.8478 | 11.1153 | 21.4315 |
| C                                  | 7   | 24.9785 | 11.4564 | 20.6685 |
| C                                  | 8   | 25.2833 | 10.6421 | 19.5589 |

|   |    |         |         |         |
|---|----|---------|---------|---------|
| C | 9  | 24.4938 | 9.5477  | 19.2304 |
| C | 10 | 20.7768 | 6.7649  | 21.6634 |
| C | 11 | 19.6534 | 6.7779  | 22.4909 |
| C | 12 | 18.6852 | 7.7872  | 22.3977 |
| C | 13 | 18.8865 | 8.7963  | 21.4442 |
| C | 14 | 19.9925 | 8.7771  | 20.5958 |
| C | 15 | 23.2224 | 5.0677  | 19.5682 |
| C | 16 | 23.9926 | 3.9851  | 19.9741 |
| C | 17 | 24.9895 | 4.1355  | 20.9582 |
| C | 18 | 25.1598 | 5.4115  | 21.5248 |
| C | 19 | 24.3828 | 6.4988  | 21.1270 |
| C | 20 | 17.4458 | 7.7267  | 23.2603 |
| C | 21 | 25.7787 | 12.6235 | 21.0521 |
| C | 22 | 25.8598 | 3.0387  | 21.3968 |
| C | 23 | 16.2692 | 6.9879  | 22.5730 |
| C | 24 | 25.8536 | 1.7691  | 20.9553 |
| C | 25 | 26.8881 | 13.0900 | 20.4531 |
| H | 26 | 22.1937 | 9.7760  | 21.7337 |
| H | 27 | 23.5916 | 11.7243 | 22.3006 |
| H | 28 | 26.1521 | 10.8666 | 18.9406 |
| H | 29 | 24.7560 | 8.9461  | 18.3614 |
| H | 30 | 21.5132 | 5.9691  | 21.7711 |
| H | 31 | 19.5331 | 5.9850  | 23.2324 |
| H | 32 | 18.1630 | 9.6073  | 21.3517 |
| H | 33 | 20.0955 | 9.5648  | 19.8485 |
| H | 34 | 22.4772 | 4.9397  | 18.7798 |
| H | 35 | 23.8299 | 3.0161  | 19.5034 |
| H | 36 | 25.9270 | 5.5524  | 22.2889 |
| H | 37 | 24.5470 | 7.4740  | 21.5849 |
| H | 38 | 17.1272 | 8.7394  | 23.5512 |
| H | 39 | 15.6593 | 6.5019  | 23.3494 |
| H | 40 | 16.6920 | 6.1708  | 21.9690 |
| H | 41 | 26.5637 | 1.0399  | 21.3437 |
| H | 42 | 25.1522 | 1.4136  | 20.1997 |
| H | 43 | 27.3304 | 12.6168 | 19.5758 |
| H | 44 | 27.4002 | 13.9691 | 20.8433 |
| P | 45 | 19.8765 | 8.3806  | 16.5984 |
| C | 46 | 20.0297 | 10.2195 | 16.5911 |
| C | 47 | 18.3762 | 8.0798  | 17.6386 |
| C | 48 | 19.2471 | 8.0708  | 14.8935 |
| C | 49 | 19.9747 | 8.5719  | 13.7954 |
| C | 50 | 19.5464 | 8.3546  | 12.4929 |
| C | 51 | 18.3855 | 7.6004  | 12.2221 |
| C | 52 | 17.6788 | 7.0851  | 13.3231 |

|   |    |         |         |         |
|---|----|---------|---------|---------|
| C | 53 | 18.0946 | 7.3177  | 14.6348 |
| C | 54 | 18.2205 | 6.8144  | 18.2238 |
| C | 55 | 17.1223 | 6.5388  | 19.0423 |
| C | 56 | 16.1626 | 7.5208  | 19.3207 |
| C | 57 | 16.3202 | 8.7796  | 18.7208 |
| C | 58 | 17.4035 | 9.0592  | 17.8906 |
| C | 59 | 20.9769 | 10.8423 | 17.4162 |
| C | 60 | 21.0768 | 12.2318 | 17.4680 |
| C | 61 | 20.2510 | 13.0554 | 16.6831 |
| C | 62 | 19.3134 | 12.4230 | 15.8407 |
| C | 63 | 19.2046 | 11.0383 | 15.7954 |
| C | 64 | 15.0354 | 7.2964  | 20.2994 |
| C | 65 | 17.8915 | 7.3377  | 10.8667 |
| C | 66 | 20.4044 | 14.5120 | 16.7561 |
| C | 67 | 15.3507 | 7.8724  | 21.6996 |
| C | 68 | 19.7529 | 15.4361 | 16.0288 |
| C | 69 | 18.4693 | 7.6843  | 9.7035  |
| H | 70 | 20.8835 | 9.1496  | 13.9697 |
| H | 71 | 20.1219 | 8.7809  | 11.6709 |
| H | 72 | 16.7769 | 6.4961  | 13.1467 |
| H | 73 | 17.5115 | 6.9116  | 15.4610 |
| H | 74 | 18.9642 | 6.0390  | 18.0323 |
| H | 75 | 17.0246 | 5.5455  | 19.4841 |
| H | 76 | 15.5823 | 9.5621  | 18.9153 |
| H | 77 | 17.4928 | 10.0514 | 17.4498 |
| H | 78 | 21.6570 | 10.2326 | 18.0108 |
| H | 79 | 21.8247 | 12.6879 | 18.1190 |
| H | 80 | 18.6584 | 13.0236 | 15.2099 |
| H | 81 | 18.4758 | 10.5859 | 15.1226 |
| H | 82 | 14.8065 | 6.2230  | 20.3837 |
| H | 83 | 16.9438 | 6.7928  | 10.8254 |
| H | 84 | 21.1399 | 14.8571 | 17.4878 |
| H | 85 | 14.4040 | 8.0448  | 22.2340 |
| H | 86 | 15.8015 | 8.8673  | 21.5631 |
| H | 87 | 19.9458 | 16.4986 | 16.1740 |
| H | 88 | 19.0081 | 15.1719 | 15.2768 |
| H | 89 | 19.4167 | 8.2224  | 9.6518  |
| H | 90 | 17.9985 | 7.4355  | 8.7528  |
| H | 91 | 17.6976 | 7.1998  | 24.1927 |
| H | 92 | 25.4086 | 13.1569 | 21.9329 |
| H | 93 | 14.1273 | 7.7828  | 19.9111 |
| H | 94 | 26.5971 | 3.3193  | 22.1544 |
| C | 95 | 21.4461 | 5.6628  | 15.9796 |
| O | 96 | 20.5014 | 5.0461  | 16.4655 |

|    |     |         |         |         |
|----|-----|---------|---------|---------|
| Rh | 97  | 21.9002 | 7.2223  | 17.1732 |
| C  | 98  | 22.5153 | 6.0279  | 13.6659 |
| C  | 99  | 22.2598 | 5.0787  | 14.8348 |
| H  | 100 | 21.5878 | 6.2401  | 13.1195 |
| H  | 101 | 23.2325 | 5.5803  | 12.9641 |
| H  | 102 | 21.7534 | 4.1604  | 14.5012 |
| H  | 103 | 23.2217 | 4.7838  | 15.2856 |
| H  | 104 | 22.9306 | 6.9828  | 14.0142 |
| C  | 105 | 23.6910 | 7.2070  | 16.6527 |
| O  | 106 | 24.7936 | 7.3347  | 16.2766 |
| H  | 107 | 24.0966 | 10.5241 | 16.2725 |
| H  | 108 | 23.6352 | 10.3477 | 15.7067 |

**R3 (TS) Crosslinking mode 2**

| ATOM | X  | Y      | Z      |        |
|------|----|--------|--------|--------|
| P    | 1  | 22.604 | 7.814  | 19.243 |
| C    | 2  | 23.499 | 6.204  | 19.375 |
| C    | 3  | 21.363 | 7.638  | 20.606 |
| C    | 4  | 23.814 | 9.011  | 19.961 |
| C    | 5  | 23.667 | 9.581  | 21.233 |
| C    | 6  | 24.599 | 10.503 | 21.710 |
| C    | 7  | 25.716 | 10.882 | 20.947 |
| C    | 8  | 25.860 | 10.300 | 19.672 |
| C    | 9  | 24.927 | 9.394  | 19.186 |
| C    | 10 | 21.326 | 6.535  | 21.471 |
| C    | 11 | 20.315 | 6.413  | 22.425 |
| C    | 12 | 19.322 | 7.391  | 22.570 |
| C    | 13 | 19.391 | 8.518  | 21.737 |
| C    | 14 | 20.378 | 8.627  | 20.758 |
| C    | 15 | 22.851 | 5.032  | 18.930 |
| C    | 16 | 23.462 | 3.789  | 19.043 |
| C    | 17 | 24.753 | 3.654  | 19.591 |
| C    | 18 | 25.392 | 4.827  | 20.029 |
| C    | 19 | 24.780 | 6.077  | 19.927 |
| C    | 20 | 18.180 | 7.161  | 23.531 |
| C    | 21 | 26.669 | 11.851 | 21.501 |
| C    | 22 | 25.444 | 2.368  | 19.723 |
| C    | 23 | 16.949 | 6.516  | 22.845 |
| C    | 24 | 25.020 | 1.165  | 19.294 |
| C    | 25 | 27.768 | 12.347 | 20.908 |
| H    | 26 | 22.821 | 9.303  | 21.861 |
| H    | 27 | 24.461 | 10.938 | 22.701 |
| H    | 28 | 26.713 | 10.560 | 19.046 |
| H    | 29 | 25.052 | 8.975  | 18.186 |
| H    | 30 | 22.088 | 5.760  | 21.405 |

|   |    |        |        |        |
|---|----|--------|--------|--------|
| H | 31 | 20.298 | 5.534  | 23.072 |
| H | 32 | 18.642 | 9.306  | 21.822 |
| H | 33 | 20.371 | 9.486  | 20.087 |
| H | 34 | 21.849 | 5.091  | 18.507 |
| H | 35 | 22.920 | 2.907  | 18.700 |
| H | 36 | 26.390 | 4.758  | 20.465 |
| H | 37 | 25.305 | 6.957  | 20.298 |
| H | 38 | 17.882 | 8.104  | 24.015 |
| H | 39 | 16.424 | 5.888  | 23.581 |
| H | 40 | 17.316 | 5.825  | 22.071 |
| H | 41 | 25.624 | 0.272  | 19.453 |
| H | 42 | 24.071 | 1.026  | 18.775 |
| H | 43 | 28.073 | 12.062 | 19.901 |
| H | 44 | 28.402 | 13.066 | 21.425 |
| P | 45 | 19.676 | 9.034  | 16.679 |
| C | 46 | 19.385 | 10.858 | 16.602 |
| C | 47 | 18.350 | 8.494  | 17.855 |
| C | 48 | 19.009 | 8.459  | 15.055 |
| C | 49 | 19.837 | 8.536  | 13.921 |
| C | 50 | 19.394 | 8.099  | 12.680 |
| C | 51 | 18.109 | 7.545  | 12.517 |
| C | 52 | 17.288 | 7.472  | 13.656 |
| C | 53 | 17.726 | 7.921  | 14.902 |
| C | 54 | 18.334 | 7.156  | 18.281 |
| C | 55 | 17.380 | 6.708  | 19.197 |
| C | 56 | 16.429 | 7.584  | 19.740 |
| C | 57 | 16.444 | 8.916  | 19.301 |
| C | 58 | 17.379 | 9.368  | 18.369 |
| C | 59 | 19.775 | 11.656 | 17.691 |
| C | 60 | 19.583 | 13.035 | 17.674 |
| C | 61 | 18.993 | 13.679 | 16.570 |
| C | 62 | 18.615 | 12.876 | 15.479 |
| C | 63 | 18.801 | 11.497 | 15.495 |
| C | 64 | 15.451 | 7.162  | 20.810 |
| C | 65 | 17.608 | 7.044  | 11.233 |
| C | 66 | 18.809 | 15.134 | 16.601 |
| C | 67 | 15.938 | 7.512  | 22.235 |
| C | 68 | 18.166 | 15.894 | 15.698 |
| C | 69 | 18.263 | 7.006  | 10.060 |
| H | 70 | 20.848 | 8.935  | 14.028 |
| H | 71 | 20.066 | 8.178  | 11.825 |
| H | 72 | 16.287 | 7.046  | 13.564 |
| H | 73 | 17.062 | 7.841  | 15.761 |
| H | 74 | 19.078 | 6.462  | 17.890 |



|                                    |     |         |         |         |
|------------------------------------|-----|---------|---------|---------|
| H                                  | 75  | 17.388  | 5.661   | 19.505  |
| H                                  | 76  | 15.701  | 9.618   | 19.689  |
| H                                  | 77  | 17.347  | 10.407  | 18.042  |
| H                                  | 78  | 20.238  | 11.197  | 18.563  |
| H                                  | 79  | 19.892  | 13.631  | 18.535  |
| H                                  | 80  | 18.165  | 13.334  | 14.598  |
| H                                  | 81  | 18.490  | 10.908  | 14.633  |
| H                                  | 82  | 15.248  | 6.082   | 20.741  |
| H                                  | 83  | 16.584  | 6.659   | 11.261  |
| H                                  | 84  | 19.250  | 15.630  | 17.470  |
| H                                  | 85  | 15.064  | 7.586   | 22.900  |
| H                                  | 86  | 16.372  | 8.523   | 22.203  |
| H                                  | 87  | 18.093  | 16.974  | 15.826  |
| H                                  | 88  | 17.691  | 15.472  | 14.812  |
| H                                  | 89  | 19.287  | 7.365   | 9.947   |
| H                                  | 90  | 17.787  | 6.598   | 9.169   |
| H                                  | 91  | 18.530  | 6.495   | 24.333  |
| H                                  | 92  | 26.430  | 12.191  | 22.513  |
| H                                  | 93  | 14.492  | 7.673   | 20.631  |
| H                                  | 94  | 26.415  | 2.423   | 20.223  |
| C                                  | 95  | 21.869  | 6.637   | 16.238  |
| O                                  | 96  | 20.818  | 6.039   | 16.408  |
| Rh                                 | 97  | 22.022  | 8.462   | 16.993  |
| C                                  | 98  | 22.853  | 6.070   | 13.974  |
| C                                  | 99  | 23.021  | 5.960   | 15.495  |
| H                                  | 100 | 21.894  | 5.644   | 13.653  |
| H                                  | 101 | 23.665  | 5.527   | 13.472  |
| H                                  | 102 | 22.995  | 4.902   | 15.794  |
| H                                  | 103 | 23.978  | 6.384   | 15.813  |
| H                                  | 104 | 22.894  | 7.116   | 13.643  |
| C                                  | 105 | 23.418  | 8.936   | 15.809  |
| O                                  | 106 | 24.282  | 9.370   | 15.148  |
| H                                  | 107 | 22.881  | 10.768  | 17.897  |
| H                                  | 108 | 22.411  | 11.124  | 17.422  |
| <b>R3 (FS) Crosslinking mode 2</b> |     |         |         |         |
| <b>R4 (IS) Crosslinking mode 2</b> |     |         |         |         |
| ATOM                               | X   | Y       | Z       |         |
| P                                  | 1   | 22.4241 | 7.6427  | 19.3821 |
| C                                  | 2   | 23.5455 | 6.3116  | 20.0134 |
| C                                  | 3   | 20.9811 | 7.5417  | 20.5238 |
| C                                  | 4   | 23.3008 | 9.1645  | 19.9629 |
| C                                  | 5   | 23.1103 | 9.7302  | 21.2343 |
| C                                  | 6   | 23.8469 | 10.8461 | 21.6308 |
| C                                  | 7   | 24.8103 | 11.4362 | 20.7906 |

|   |    |         |         |         |
|---|----|---------|---------|---------|
| C | 8  | 25.0042 | 10.8544 | 19.5232 |
| C | 9  | 24.2648 | 9.7496  | 19.1210 |
| C | 10 | 20.6892 | 6.3737  | 21.2423 |
| C | 11 | 19.5664 | 6.3134  | 22.0673 |
| C | 12 | 18.7048 | 7.4093  | 22.2200 |
| C | 13 | 19.0061 | 8.5765  | 21.5031 |
| C | 14 | 20.1125 | 8.6386  | 20.6563 |
| C | 15 | 23.4359 | 5.0062  | 19.4980 |
| C | 16 | 24.2771 | 3.9903  | 19.9382 |
| C | 17 | 25.2698 | 4.2295  | 20.9074 |
| C | 18 | 25.3671 | 5.5345  | 21.4220 |
| C | 19 | 24.5241 | 6.5560  | 20.9883 |
| C | 20 | 17.4851 | 7.2865  | 23.1034 |
| C | 21 | 25.5505 | 12.6095 | 21.2626 |
| C | 22 | 26.1990 | 3.1992  | 21.3824 |
| C | 23 | 16.2360 | 6.7529  | 22.3618 |
| C | 24 | 26.2819 | 1.9225  | 20.9677 |
| C | 25 | 26.5209 | 13.2765 | 20.6094 |
| H | 26 | 22.3824 | 9.3025  | 21.9232 |
| H | 27 | 23.6761 | 11.2734 | 22.6208 |
| H | 28 | 25.7376 | 11.2707 | 18.8329 |
| H | 29 | 24.4210 | 9.3404  | 18.1248 |
| H | 30 | 21.3456 | 5.5079  | 21.1679 |
| H | 31 | 19.3655 | 5.3934  | 22.6205 |
| H | 32 | 18.3657 | 9.4542  | 21.6023 |
| H | 33 | 20.3033 | 9.5599  | 20.1051 |
| H | 34 | 22.6766 | 4.7791  | 18.7525 |
| H | 35 | 24.1590 | 2.9935  | 19.5135 |
| H | 36 | 26.1292 | 5.7571  | 22.1716 |
| H | 37 | 24.6434 | 7.5539  | 21.4075 |
| H | 38 | 17.2482 | 8.2563  | 23.5683 |
| H | 39 | 15.5771 | 6.2678  | 23.0980 |
| H | 40 | 16.5606 | 5.9540  | 21.6785 |
| H | 41 | 27.0217 | 1.2430  | 21.3897 |
| H | 42 | 25.6257 | 1.5129  | 20.1987 |
| H | 43 | 26.8587 | 12.9918 | 19.6121 |
| H | 44 | 27.0076 | 14.1387 | 21.0630 |
| P | 45 | 20.0451 | 8.6791  | 16.5526 |
| C | 46 | 20.1437 | 10.5246 | 16.5342 |
| C | 47 | 18.5805 | 8.3546  | 17.6252 |
| C | 48 | 19.3932 | 8.3351  | 14.8623 |
| C | 49 | 20.1740 | 8.6990  | 13.7483 |
| C | 50 | 19.7440 | 8.4298  | 12.4571 |
| C | 51 | 18.5191 | 7.7714  | 12.2188 |

|   |    |         |         |         |
|---|----|---------|---------|---------|
| C | 52 | 17.7407 | 7.4282  | 13.3363 |
| C | 53 | 18.1639 | 7.7061  | 14.6380 |
| C | 54 | 18.4043 | 7.0723  | 18.1666 |
| C | 55 | 17.2743 | 6.7749  | 18.9308 |
| C | 56 | 16.3031 | 7.7473  | 19.2030 |
| C | 57 | 16.4919 | 9.0281  | 18.6612 |
| C | 58 | 17.6073 | 9.3341  | 17.8833 |
| C | 59 | 21.0180 | 11.1956 | 17.4012 |
| C | 60 | 21.0875 | 12.5868 | 17.4074 |
| C | 61 | 20.2957 | 13.3670 | 16.5440 |
| C | 62 | 19.4139 | 12.6863 | 15.6820 |
| C | 63 | 19.3356 | 11.2975 | 15.6796 |
| C | 64 | 15.1267 | 7.4786  | 20.1092 |
| C | 65 | 18.0395 | 7.4359  | 10.8746 |
| C | 66 | 20.4353 | 14.8269 | 16.5638 |
| C | 67 | 15.4218 | 7.8177  | 21.5887 |
| C | 68 | 19.7927 | 15.7169 | 15.7880 |
| C | 69 | 18.7109 | 7.5691  | 9.7175  |
| H | 70 | 21.1298 | 9.2019  | 13.8999 |
| H | 71 | 20.3710 | 8.7342  | 11.6194 |
| H | 72 | 16.7856 | 6.9225  | 13.1835 |
| H | 73 | 17.5318 | 7.4250  | 15.4794 |
| H | 74 | 19.1567 | 6.2996  | 18.0071 |
| H | 75 | 17.1622 | 5.7656  | 19.3302 |
| H | 76 | 15.7502 | 9.8066  | 18.8559 |
| H | 77 | 17.7156 | 10.3413 | 17.4829 |
| H | 78 | 21.6755 | 10.6226 | 18.0543 |
| H | 79 | 21.7850 | 13.0824 | 18.0855 |
| H | 80 | 18.7806 | 13.2510 | 14.9979 |
| H | 81 | 18.6498 | 10.8073 | 14.9882 |
| H | 82 | 14.8117 | 6.4264  | 20.0310 |
| H | 83 | 17.0269 | 7.0241  | 10.8404 |
| H | 84 | 21.1523 | 15.2048 | 17.2977 |
| H | 85 | 14.4631 | 7.9767  | 22.1053 |
| H | 86 | 15.9402 | 8.7884  | 21.6195 |
| H | 87 | 19.9778 | 16.7858 | 15.8900 |
| H | 88 | 19.0657 | 15.4180 | 15.0317 |
| H | 89 | 19.7304 | 7.9546  | 9.6733  |
| H | 90 | 18.2559 | 7.2821  | 8.7704  |
| H | 91 | 17.7257 | 6.5984  | 23.9276 |
| H | 92 | 25.2683 | 12.9552 | 22.2611 |
| H | 93 | 14.2741 | 8.0879  | 19.7723 |
| H | 94 | 26.8998 | 3.5371  | 22.1511 |
| C | 95 | 21.3842 | 5.5467  | 16.6869 |

|                                    |     |         |        |         |
|------------------------------------|-----|---------|--------|---------|
| O                                  | 96  | 20.6419 | 4.9721 | 17.4809 |
| Rh                                 | 97  | 22.1423 | 7.5787 | 16.9240 |
| C                                  | 98  | 20.9812 | 5.0634 | 14.2234 |
| C                                  | 99  | 21.8322 | 4.7420 | 15.4569 |
| H                                  | 100 | 19.9196 | 4.8546 | 14.4134 |
| H                                  | 101 | 21.3027 | 4.4497 | 13.3704 |
| H                                  | 102 | 21.7356 | 3.6741 | 15.7098 |
| H                                  | 103 | 22.8868 | 4.9659 | 15.2434 |
| H                                  | 104 | 21.0721 | 6.1191 | 13.9392 |
| C                                  | 105 | 23.9289 | 7.0440 | 16.6734 |
| O                                  | 106 | 25.0428 | 6.8069 | 16.4471 |
| H                                  | 107 | 22.6992 | 9.1075 | 16.8424 |
| H                                  | 108 | 22.1269 | 7.6539 | 15.3430 |
| <b>R4 (TS) Crosslinking mode 2</b> |     |         |        |         |
| ATOM                               | X   | Y       | Z      |         |
| P                                  | 1   | 22.606  | 7.826  | 19.064  |
| C                                  | 2   | 23.823  | 6.484  | 19.437  |
| C                                  | 3   | 21.355  | 7.607  | 20.407  |
| C                                  | 4   | 23.527  | 9.327  | 19.633  |
| C                                  | 5   | 23.380  | 9.883  | 20.912  |
| C                                  | 6   | 24.117  | 11.007 | 21.285  |
| C                                  | 7   | 25.040  | 11.609 | 20.411  |
| C                                  | 8   | 25.191  | 11.038 | 19.133  |
| C                                  | 9   | 24.444  | 9.930  | 18.751  |
| C                                  | 10  | 21.327  | 6.484  | 21.245  |
| C                                  | 11  | 20.338  | 6.349  | 22.218  |
| C                                  | 12  | 19.353  | 7.327  | 22.405  |
| C                                  | 13  | 19.398  | 8.460  | 21.580  |
| C                                  | 14  | 20.368  | 8.590  | 20.587  |
| C                                  | 15  | 23.494  | 5.151  | 19.124  |
| C                                  | 16  | 24.376  | 4.110  | 19.386  |
| C                                  | 17  | 25.639  | 4.351  | 19.962  |
| C                                  | 18  | 25.964  | 5.683  | 20.265  |
| C                                  | 19  | 25.077  | 6.730  | 20.014  |
| C                                  | 20  | 18.280  | 7.121  | 23.448  |
| C                                  | 21  | 25.787  | 12.786 | 20.868  |
| C                                  | 22  | 26.607  | 3.289  | 20.258  |
| C                                  | 23  | 17.038  | 6.352  | 22.931  |
| C                                  | 24  | 26.475  | 1.972  | 20.020  |
| C                                  | 25  | 26.752  | 13.450 | 20.206  |
| H                                  | 26  | 22.685  | 9.442  | 21.625  |
| H                                  | 27  | 23.981  | 11.428 | 22.283  |
| H                                  | 28  | 25.895  | 11.467 | 18.420  |
| H                                  | 29  | 24.574  | 9.523  | 17.750  |

|   |    |        |        |        |
|---|----|--------|--------|--------|
| H | 30 | 22.090 | 5.712  | 21.159 |
| H | 31 | 20.344 | 5.466  | 22.861 |
| H | 32 | 18.657 | 9.252  | 21.702 |
| H | 33 | 20.356 | 9.476  | 19.951 |
| H | 34 | 22.527 | 4.920  | 18.679 |
| H | 35 | 24.077 | 3.093  | 19.133 |
| H | 36 | 26.933 | 5.905  | 20.716 |
| H | 37 | 25.368 | 7.745  | 20.278 |
| H | 38 | 17.959 | 8.090  | 23.862 |
| H | 39 | 16.595 | 5.811  | 23.780 |
| H | 40 | 17.380 | 5.580  | 22.226 |
| H | 41 | 27.269 | 1.277  | 20.291 |
| H | 42 | 25.587 | 1.541  | 19.556 |
| H | 43 | 27.085 | 13.161 | 19.208 |
| H | 44 | 27.243 | 14.312 | 20.656 |
| P | 45 | 19.682 | 8.737  | 16.663 |
| C | 46 | 19.492 | 10.579 | 16.695 |
| C | 47 | 18.410 | 8.204  | 17.894 |
| C | 48 | 18.875 | 8.326  | 15.053 |
| C | 49 | 19.575 | 8.617  | 13.867 |
| C | 50 | 19.007 | 8.372  | 12.623 |
| C | 51 | 17.723 | 7.801  | 12.509 |
| C | 52 | 17.037 | 7.504  | 13.699 |
| C | 53 | 17.599 | 7.761  | 14.951 |
| C | 54 | 18.406 | 6.860  | 18.300 |
| C | 55 | 17.463 | 6.404  | 19.224 |
| C | 56 | 16.517 | 7.273  | 19.785 |
| C | 57 | 16.528 | 8.612  | 19.368 |
| C | 58 | 17.456 | 9.077  | 18.438 |
| C | 59 | 20.334 | 11.369 | 17.486 |
| C | 60 | 20.159 | 12.750 | 17.558 |
| C | 61 | 19.142 | 13.400 | 16.835 |
| C | 62 | 18.305 | 12.602 | 16.034 |
| C | 63 | 18.471 | 11.222 | 15.971 |
| C | 64 | 15.535 | 6.821  | 20.839 |
| C | 65 | 17.081 | 7.504  | 11.224 |
| C | 66 | 19.015 | 14.859 | 16.929 |
| C | 67 | 15.938 | 7.222  | 22.276 |
| C | 68 | 18.133 | 15.644 | 16.289 |
| C | 69 | 17.594 | 7.673  | 9.993  |
| H | 70 | 20.579 | 9.039  | 13.929 |
| H | 71 | 19.575 | 8.617  | 11.726 |
| H | 72 | 16.042 | 7.058  | 13.641 |
| H | 73 | 17.034 | 7.525  | 15.853 |

|                                    |     |         |         |         |
|------------------------------------|-----|---------|---------|---------|
| H                                  | 74  | 19.145  | 6.168   | 17.894  |
| H                                  | 75  | 17.475  | 5.354   | 19.522  |
| H                                  | 76  | 15.792  | 9.309   | 19.776  |
| H                                  | 77  | 17.433  | 10.124  | 18.139  |
| H                                  | 78  | 21.160  | 10.905  | 18.027  |
| H                                  | 79  | 20.830  | 13.344  | 18.180  |
| H                                  | 80  | 17.507  | 13.062  | 15.452  |
| H                                  | 81  | 17.806  | 10.634  | 15.338  |
| H                                  | 82  | 15.400  | 5.730   | 20.787  |
| H                                  | 83  | 16.071  | 7.093   | 11.305  |
| H                                  | 84  | 19.730  | 15.334  | 17.607  |
| H                                  | 85  | 15.035  | 7.186   | 22.904  |
| H                                  | 86  | 16.251  | 8.278   | 22.263  |
| H                                  | 87  | 18.135  | 16.722  | 16.442  |
| H                                  | 88  | 17.391  | 15.253  | 15.591  |
| H                                  | 89  | 18.595  | 8.073   | 9.822   |
| H                                  | 90  | 17.014  | 7.417   | 9.107   |
| H                                  | 91  | 18.721  | 6.558   | 24.284  |
| H                                  | 92  | 25.514  | 13.135  | 21.868  |
| H                                  | 93  | 14.554  | 7.269   | 20.617  |
| H                                  | 94  | 27.534  | 3.636   | 20.722  |
| C                                  | 95  | 21.647  | 5.746   | 16.440  |
| O                                  | 96  | 20.677  | 5.120   | 16.845  |
| Rh                                 | 97  | 21.922  | 7.958   | 16.717  |
| C                                  | 98  | 22.607  | 4.957   | 14.249  |
| C                                  | 99  | 22.798  | 4.995   | 15.771  |
| H                                  | 100 | 21.679  | 4.430   | 13.986  |
| H                                  | 101 | 23.449  | 4.435   | 13.774  |
| H                                  | 102 | 22.800  | 3.969   | 16.168  |
| H                                  | 103 | 23.755  | 5.472   | 16.021  |
| H                                  | 104 | 22.559  | 5.969   | 13.823  |
| C                                  | 105 | 23.532  | 8.162   | 15.759  |
| O                                  | 106 | 24.511  | 8.327   | 15.147  |
| H                                  | 107 | 22.199  | 9.543   | 16.859  |
| H                                  | 108 | 21.367  | 7.027   | 15.507  |
| <b>R4 (FS) Crosslinking mode 2</b> |     |         |         |         |
| ATOM                               | X   | Y       | Z       |         |
| P                                  | 1   | 22.4414 | 7.7680  | 19.3956 |
| C                                  | 2   | 23.4656 | 6.3530  | 19.9802 |
| C                                  | 3   | 20.9987 | 7.7208  | 20.5454 |
| C                                  | 4   | 23.3739 | 9.2485  | 19.9859 |
| C                                  | 5   | 23.2105 | 9.8237  | 21.2553 |
| C                                  | 6   | 23.9505 | 10.9465 | 21.6219 |
| C                                  | 7   | 24.8846 | 11.5340 | 20.7478 |

|   |    |         |         |         |
|---|----|---------|---------|---------|
| C | 8  | 25.0459 | 10.9470 | 19.4772 |
| C | 9  | 24.3029 | 9.8335  | 19.1037 |
| C | 10 | 20.6908 | 6.5872  | 21.3114 |
| C | 11 | 19.5545 | 6.5648  | 22.1198 |
| C | 12 | 18.6918 | 7.6667  | 22.2032 |
| C | 13 | 19.0098 | 8.8009  | 21.4434 |
| C | 14 | 20.1343 | 8.8252  | 20.6190 |
| C | 15 | 23.2916 | 5.0994  | 19.3644 |
| C | 16 | 24.0531 | 4.0030  | 19.7530 |
| C | 17 | 25.0329 | 4.1201  | 20.7581 |
| C | 18 | 25.2014 | 5.3793  | 21.3616 |
| C | 19 | 24.4319 | 6.4788  | 20.9872 |
| C | 20 | 17.4662 | 7.5989  | 23.0836 |
| C | 21 | 25.6288 | 12.7150 | 21.1959 |
| C | 22 | 25.8906 | 3.0092  | 21.1856 |
| C | 23 | 16.2702 | 6.8348  | 22.4663 |
| C | 24 | 25.8751 | 1.7438  | 20.7336 |
| C | 25 | 26.5923 | 13.3784 | 20.5302 |
| H | 26 | 22.4943 | 9.4017  | 21.9605 |
| H | 27 | 23.8055 | 11.3832 | 22.6119 |
| H | 28 | 25.7558 | 11.3686 | 18.7654 |
| H | 29 | 24.4217 | 9.4081  | 18.1051 |
| H | 30 | 21.3489 | 5.7191  | 21.2876 |
| H | 31 | 19.3446 | 5.6711  | 22.7116 |
| H | 32 | 18.3653 | 9.6804  | 21.4917 |
| H | 33 | 20.3389 | 9.7226  | 20.0337 |
| H | 34 | 22.5697 | 4.9830  | 18.5531 |
| H | 35 | 23.8963 | 3.0535  | 19.2426 |
| H | 36 | 25.9595 | 5.4948  | 22.1390 |
| H | 37 | 24.5963 | 7.4393  | 21.4745 |
| H | 38 | 17.1447 | 8.6133  | 23.3648 |
| H | 39 | 15.6477 | 6.4661  | 23.2954 |
| H | 40 | 16.6555 | 5.9355  | 21.9604 |
| H | 41 | 26.5764 | 1.0053  | 21.1208 |
| H | 42 | 25.1743 | 1.4011  | 19.9716 |
| H | 43 | 26.9312 | 13.0820 | 19.5368 |
| H | 44 | 27.0797 | 14.2446 | 20.9760 |
| P | 45 | 20.1321 | 8.7493  | 16.5345 |
| C | 46 | 20.1479 | 10.5898 | 16.5177 |
| C | 47 | 18.7009 | 8.3195  | 17.6077 |
| C | 48 | 19.4818 | 8.3298  | 14.8560 |
| C | 49 | 20.2654 | 8.6310  | 13.7258 |
| C | 50 | 19.8199 | 8.3359  | 12.4459 |
| C | 51 | 18.5745 | 7.7069  | 12.2336 |

|   |    |         |         |         |
|---|----|---------|---------|---------|
| C | 52 | 17.8017 | 7.4033  | 13.3667 |
| C | 53 | 18.2385 | 7.7163  | 14.6560 |
| C | 54 | 18.6208 | 7.0176  | 18.1247 |
| C | 55 | 17.5253 | 6.6269  | 18.8967 |
| C | 56 | 16.4906 | 7.5247  | 19.1927 |
| C | 57 | 16.5856 | 8.8280  | 18.6810 |
| C | 58 | 17.6689 | 9.2233  | 17.8990 |
| C | 59 | 21.0325 | 11.2524 | 17.3833 |
| C | 60 | 21.0606 | 12.6431 | 17.4459 |
| C | 61 | 20.2198 | 13.4289 | 16.6364 |
| C | 62 | 19.3530 | 12.7558 | 15.7512 |
| C | 63 | 19.3168 | 11.3667 | 15.6905 |
| C | 64 | 15.3049 | 7.1391  | 20.0441 |
| C | 65 | 18.0684 | 7.3618  | 10.9015 |
| C | 66 | 20.2834 | 14.8902 | 16.7423 |
| C | 67 | 15.3706 | 7.6472  | 21.5021 |
| C | 68 | 19.5298 | 15.7888 | 16.0855 |
| C | 69 | 18.6916 | 7.5351  | 9.7223  |
| H | 70 | 21.2417 | 9.0977  | 13.8593 |
| H | 71 | 20.4510 | 8.5940  | 11.5959 |
| H | 72 | 16.8350 | 6.9138  | 13.2355 |
| H | 73 | 17.6045 | 7.4751  | 15.5081 |
| H | 74 | 19.4261 | 6.3078  | 17.9239 |
| H | 75 | 17.4832 | 5.6062  | 19.2811 |
| H | 76 | 15.7911 | 9.5466  | 18.8955 |
| H | 77 | 17.7074 | 10.2431 | 17.5160 |
| H | 78 | 21.7145 | 10.6689 | 18.0033 |
| H | 79 | 21.7574 | 13.1332 | 18.1286 |
| H | 80 | 18.6988 | 13.3307 | 15.0957 |
| H | 81 | 18.6408 | 10.8791 | 14.9866 |
| H | 82 | 15.1813 | 6.0455  | 20.0448 |
| H | 83 | 17.0704 | 6.9140  | 10.8949 |
| H | 84 | 21.0279 | 15.2615 | 17.4519 |
| H | 85 | 14.3437 | 7.6497  | 21.8967 |
| H | 86 | 15.6873 | 8.7020  | 21.4908 |
| H | 87 | 19.6631 | 16.8578 | 16.2503 |
| H | 88 | 18.7634 | 15.4979 | 15.3660 |
| H | 89 | 19.6883 | 7.9708  | 9.6435  |
| H | 90 | 18.2130 | 7.2398  | 8.7893  |
| H | 91 | 17.7462 | 7.0937  | 24.0213 |
| H | 92 | 25.3530 | 13.0714 | 22.1928 |
| H | 93 | 14.3983 | 7.5547  | 19.5775 |
| H | 94 | 26.6237 | 3.2740  | 21.9534 |
| C | 95 | 21.4744 | 4.2226  | 15.3978 |

|    |     |         |        |         |
|----|-----|---------|--------|---------|
| O  | 96  | 21.7336 | 3.6403 | 16.4400 |
| Rh | 97  | 22.2489 | 7.8328 | 17.0112 |
| C  | 98  | 20.3644 | 3.3142 | 13.3366 |
| C  | 99  | 21.6996 | 3.6479 | 14.0226 |
| H  | 100 | 19.8444 | 2.5053 | 13.8677 |
| H  | 101 | 20.5371 | 2.9846 | 12.3032 |
| H  | 102 | 22.3329 | 2.7550 | 14.1120 |
| H  | 103 | 22.2352 | 4.4042 | 13.4256 |
| H  | 104 | 19.6975 | 4.1878 | 13.3007 |
| C  | 105 | 23.8717 | 6.9644 | 16.6520 |
| O  | 106 | 24.8424 | 6.4259 | 16.3020 |
| H  | 107 | 22.2974 | 7.9726 | 15.4130 |
| H  | 108 | 21.0248 | 5.2461 | 15.4193 |
